# Supplementary material for: Estradiol elicits distinct firing patterns in arcuate nucleus kisspeptin neurons of females through altering ion channel conductances
Source: eLife. 2024 Dec 13;13:RP96691. doi: 10.7554/eLife.96691 (PMC11643640; doi:10.7554/eLife.96691)
Supplement: Figure 4—source data 1. [file elife-96691-fig4-data1.xlsx]

## Sheet: Abstract
Estradiol elicits distinct firing patterns in arcuate nucleus kisspeptin neurons of females through altering ion channel conductances
Jian Qiu1, Margaritis Voliotis2,3, Martha A. Bosch1, Xiao Feng Li4, Larry S. Zweifel5,6, Krasimira Tsaneva-Atanasova 2,3, Kevin T. O’Byrne4 , Oline K. Rønnekleiv 1,7 and Martin J. Kelly 1,7
1Department of Chemical Physiology and Biochemistry, Oregon Health & Science U., Portland, OR 97239, USA
2Department of Mathematics and Statistics, University of Exeter, Stocker Rd, Exeter, EX4 4PY, UK
3Living Systems Institute, University of Exeter, Stocker Rd, Exeter, EX4 4PY, UK
4Department of Women and Children’s Health, School of Life Course and Population Sciences, King’s College London, Guy’s Campus, London SE1 1UL, UK
5Department of Psychiatry and Behavioral Sciences, University of Washington, Seattle, WA 98195, USA
6Depatment of Pharmacology, University of Washington, Seattle, WA 98195, USA
7Division of Neuroscience, Oregon National Primate Research Center, Beaverton, OR 97006, USA
Abstract
Hypothalamic kisspeptin (Kiss1) neurons are vital for pubertal development and reproduction. Arcuate nucleus Kiss1 (Kiss1ARH) neurons are responsible for the pulsatile release of Gonadotropin-releasing Hormone (GnRH). In females, the behavior of Kiss1ARH neurons, expressing Kiss1, Neurokinin B (NKB), and Dynorphin (Dyn), varies throughout the ovarian cycle. Studies indicate that 17β-estradiol (E2…
Keywords: Kisspeptin; Arcuate nucleus; 17β-estradiol; Ion channels; Synchronous firing; Burst firing; Mathematical modeling

## Sheet: Figure 4 A-B
Figure 4 A-B
	Cav 3.1 (T-type)			Cav 2.3 (R-type)			Cav 1.2 (L-type)			Cav 2.2 (N-type)			Cav 2.1 (PQ-type)				HCN1
	OVX	OVX+E2		OVX	OVX+E2		OVX	OVX+E2		OVX	OVX+E2		OVX	OVX+E2			OVX	OVX+E2
	1.177	2.213		1.106	1.943		1.088	1.423		1.127	1.357		1.188	1.501			1.27	3.991
	1.077	3.428		0.957	1.321		0.796	1.4		0.997	1.319		0.869	1.888			1.042	4.192
	1.2	2.293		1.054	1.998		1.097	2.661		1.041	1.149		1.064	1.153			0.963	3.075
	1.054	2.62		1.343	1.135		0.905	1.375		0.989	1.445		0.95	1.843			1.161	4.386
	0.936	2.748		0.884	2.022		1.347	2.06		1.164	1.314		1.095	1.889			1.245	4.38
Mean	1.089	2.66		1.069	1.684		1.047	1.784		1.064	1.317		1.033	1.655			1.136	4.005
SEM	0.04735	0.2161		0.07856	0.1888		0.09417	0.254		0.03508	0.04807		0.05595	0.1449			0.05883	0.2435
