# Supplementary material for: Estradiol elicits distinct firing patterns in arcuate nucleus kisspeptin neurons of females through altering ion channel conductances
Source: eLife. 2024 Dec 13;13:RP96691. doi: 10.7554/eLife.96691 (PMC11643640; doi:10.7554/eLife.96691)
Supplement: Figure 7—source data 1. [file elife-96691-fig7-data1.xlsx]

## Sheet: Abstract
Estradiol elicits distinct firing patterns in arcuate nucleus kisspeptin neurons of females through altering ion channel conductances
Jian Qiu1, Margaritis Voliotis2,3, Martha A. Bosch1, Xiao Feng Li4, Larry S. Zweifel5,6, Krasimira Tsaneva-Atanasova 2,3, Kevin T. O’Byrne4 , Oline K. Rønnekleiv 1,7 and Martin J. Kelly 1,7
1Department of Chemical Physiology and Biochemistry, Oregon Health & Science U., Portland, OR 97239, USA
2Department of Mathematics and Statistics, University of Exeter, Stocker Rd, Exeter, EX4 4PY, UK
3Living Systems Institute, University of Exeter, Stocker Rd, Exeter, EX4 4PY, UK
4Department of Women and Children’s Health, School of Life Course and Population Sciences, King’s College London, Guy’s Campus, London SE1 1UL, UK
5Department of Psychiatry and Behavioral Sciences, University of Washington, Seattle, WA 98195, USA
6Depatment of Pharmacology, University of Washington, Seattle, WA 98195, USA
7Division of Neuroscience, Oregon National Primate Research Center, Beaverton, OR 97006, USA
Abstract
Hypothalamic kisspeptin (Kiss1) neurons are vital for pubertal development and reproduction. Arcuate nucleus Kiss1 (Kiss1ARH) neurons are responsible for the pulsatile release of Gonadotropin-releasing Hormone (GnRH). In females, the behavior of Kiss1ARH neurons, expressing Kiss1, Neurokinin B (NKB), and Dynorphin (Dyn), varies throughout the ovarian cycle. Studies indicate that 17β-estradiol (E2…
Keywords: Kisspeptin; Arcuate nucleus; 17β-estradiol; Ion channels; Synchronous firing; Burst firing; Mathematical modeling

## Sheet: Figure 7B
Figure 7B	OVX
		Control							Apamin
	-60	-0.87939	1.39434	-1.29006	-2.52075	1.25408			0.574212	0.994452	-1.25538	-1.72119	0.277519
	-50	0.979775	2.5519	1.38716	0.927734	1.71185			1.53792	2.24673	0.89472	0.946045	1.40285
	-40	8.86616	5.54052	1.6854	2.00195	3.22819			2.79075	3.66737	1.69927	2.28882	2.49004
	-30	4.44111	8.0135	4.41118	5.00488	5.97			4.48528	6.28241	4.66087	4.64478	4.80175
	-20	8.57705	13.4119	13.9063	9.64355	11.2677			7.76994	9.87612	11.1736	8.46558	8.95214
	-10	18.3346	22.0411	32.3001	18.4814	19.35			12.5323	14.7695	22.3056	15.7043	15.5373
	0	33.7781	35.2162	53.4682	32.4829	33.1545			20.756	20.9466	36.1703	24.939	24.3607
	10	52.3537	51.8957	77.3204	54.8401	51.9657			30.0959	28.8286	48.6409	35.083	34.0748
	20	72.3106	72.1951	100.639	84.6497	73.328			40.7088	38.0523	64.9123	45.6177	45.2919
	30	90.3642	94.0783	126.627	103.65	99.7639			51.663	47.7284	78.7284	57.6965	56.592
	40	110.63	114.225	151.575	127.576	123.439			62.5209	60.3617	93.682	69.6472	68.0962

## Sheet: Figure 7C
Figure 7C	OVX
	mV
	-60	-1.17252	0.815556	-1.42878	-1.65405	0.748634
	-50	-1.16449	0.98919	1.13747	-1.00098	1.31607
	-40	-0.91151	2.79394	1.04037	-1.14746	3.55721
	-30	-0.85931	2.46771	-1.47039	1.2085	4.74453
	-20	1.83507	4.67761	3.52339	2.7771	8.89301
	-10	6.88653	9.03425	11.5759	4.46777	15.1873
	0	17.4231	15.5377	19.3162	9.38721	25.32
	10	24.6188	24.2457	29.9558	21.0083	35.5339
	20	34.2158	36.0423	37.5019	40.9973	46.4058
	30	43.1703	48.3756	49.7783	47.4304	58.8465
	40	51.6149	57.7835	59.1001	60.321	72.0692

## Sheet: Figure 7E
Figure 7E	OVX+E2
	mV	Control								Apamin
	-60	1.99167	1.6098	1.93914	1.32594	1.21435	-0.20345			1.72665	-1.54877	1.25249	1.04904	-0.74387	0.623431
	-50	4.20821	1.93024	3.35058	2.80446	2.04086	0.726609			3.26056	0.854492	2.08537	2.21252	1.55131	2.03305
	-40	6.65765	3.13568	6.02086	4.61973	4.08173	2.32515			5.51726	2.35748	3.51588	3.61761	2.30789	3.55457
	-30	10.8096	5.85175	9.81013	7.71358	7.10805	9.74383			9.01072	4.79126	5.82377	6.40233	5.89371	7.57127
	-20	20.3343	14.8087	16.1743	14.1275	18.4059	27.5239			17.3709	10.5591	10.7638	12.4041	12.4486	16.0871
	-10	40.1226	37.3993	28.5784	28.8707	31.7001	50.9208			32.2041	20.2713	19.385	22.4876	26.6329	30.131
	0	72.6559	69.4351	49.6101	52.2903	56.1841	79.5346			54.5462	33.2947	32.1579	39.0053	46.7873	49.4472
	10	110.554	107.498	75.1178	79.3404	84.6481	110.67			81.0643	46.9894	44.2123	57.9262	68.3339	71.6146
	20	152.893	149.971	103.747	109.532	116.177	145.177			109.823	60.7987	60.2913	81.1831	92.6971	95.1814
	30	196.116	188.5	124.989	137.187	149.504	176.457			140.726	75.7446	75.8553	106.665	116.049	122.422
	40	240.438	224.136	151.183	162.259	181.166	213.289			171.991	91.8274	91.0632	130.787	136.007	146.903

## Sheet: Figure 7F
Figure 7F
	mV	OVX							OVX+E2
	-60	-1.17252	0.815556	-1.42878	-1.65405	0.748634			-1.18055	2.70081	-2.81016	1.21435	1.43051	1.48646
	-50	-1.16449	0.98919	1.13747	-1.00098	1.31607			1.54997	1.72424	1.96457	2.02179	1.61489	-0.29755
	-40	-0.91151	2.79394	1.04037	-1.14746	3.55721			2.75461	1.59454	3.0899	2.65122	2.95003	-1.05667
	-30	-0.85931	2.46771	-1.47039	1.2085	4.74453			3.01963	1.93787	4.80016	3.9355	3.51588	-1.99763
	-20	1.83507	4.67761	3.52339	2.7771	8.89301			5.54938	6.40869	7.07626	5.78562	7.32422	0.623067
	-10	6.88653	9.03425	11.5759	4.46777	15.1873			10.2635	18.3716	10.7956	14.1525	7.16527	4.21905
	0	17.4231	15.5377	19.3162	9.38721	25.32			21.1856	39.4363	19.1307	26.3596	11.8001	13.0768
	10	24.6188	24.2457	29.9558	21.0083	35.5339			32.8466	63.9877	31.2487	39.6474	19.1243	24.3403
	20	34.2158	36.0423	37.5019	40.9973	46.4058			48.0732	92.865	45.7954	56.5974	29.2778	36.2676
	30	43.1703	48.3756	49.7783	47.4304	58.8465			62.1595	115.707	50.9198	62.0206	37.4858	53.6868
	40	51.6149	57.7835	59.1001	60.321	72.0692			73.8847	134.621	63.8708	69.1922	48.3704	65.4284

## Sheet: Figure 7G
Figure 7G
	OVX	E2
	1.247	0.818
	1.131	1.487
	1.123	1.585
	0.651	0.782
	1.245	1.276
Mean	1.079	1.19
SEM	0.1104	0.1668

## Sheet: Figure 7H
Voltage	Control-Model	Control-Data	Model-Apamin	Data-Apamin	Model-Apamin sens cur	Data-Apamain sens cur
-60	3.8939	-0.2584	3.6413	0.1044	0.2525	-0.3628
-50	7.6268	1.6396	7.3716	1.5598	0.2552	0.0798
-40	8.8052	5.364	8.4532	2.7191	0.352	2.6449
-30	12.3377	5.6219	10.284	5.1429	2.0537	0.4791
-20	16.7866	11.9651	10.6749	9.6066	6.1117	2.3585
-10	18.4434	24.2253	11.4797	16.5358	6.9637	7.6895
0	22.4602	40.8209	13.1327	25.9576	9.3275	14.8632
10	37.2694	60.5233	19.483	35.8551	17.7864	24.6681
20	71.1008	81.7148	38.1733	47.8911	32.9275	33.8236
30	105.454	103.69	60.0121	59.3733	45.4422	44.3166
40	124.162	125.477	75.816	72.1882	48.346	53.2887
