# Supplementary material for: Estradiol elicits distinct firing patterns in arcuate nucleus kisspeptin neurons of females through altering ion channel conductances
Source: eLife. 2024 Dec 13;13:RP96691. doi: 10.7554/eLife.96691 (PMC11643640; doi:10.7554/eLife.96691)
Supplement: Figure 8—source data 1. [file elife-96691-fig8-data1.xlsx]

## Sheet: Abstract
Estradiol elicits distinct firing patterns in arcuate nucleus kisspeptin neurons of females through altering ion channel conductances
Jian Qiu1, Margaritis Voliotis2,3, Martha A. Bosch1, Xiao Feng Li4, Larry S. Zweifel5,6, Krasimira Tsaneva-Atanasova 2,3, Kevin T. O’Byrne4 , Oline K. Rønnekleiv 1,7 and Martin J. Kelly 1,7
1Department of Chemical Physiology and Biochemistry, Oregon Health & Science U., Portland, OR 97239, USA
2Department of Mathematics and Statistics, University of Exeter, Stocker Rd, Exeter, EX4 4PY, UK
3Living Systems Institute, University of Exeter, Stocker Rd, Exeter, EX4 4PY, UK
4Department of Women and Children’s Health, School of Life Course and Population Sciences, King’s College London, Guy’s Campus, London SE1 1UL, UK
5Department of Psychiatry and Behavioral Sciences, University of Washington, Seattle, WA 98195, USA
6Depatment of Pharmacology, University of Washington, Seattle, WA 98195, USA
7Division of Neuroscience, Oregon National Primate Research Center, Beaverton, OR 97006, USA
Abstract
Hypothalamic kisspeptin (Kiss1) neurons are vital for pubertal development and reproduction. Arcuate nucleus Kiss1 (Kiss1ARH) neurons are responsible for the pulsatile release of Gonadotropin-releasing Hormone (GnRH). In females, the behavior of Kiss1ARH neurons, expressing Kiss1, Neurokinin B (NKB), and Dynorphin (Dyn), varies throughout the ovarian cycle. Studies indicate that 17β-estradiol (E2…
Keywords: Kisspeptin; Arcuate nucleus; 17β-estradiol; Ion channels; Synchronous firing; Burst firing; Mathematical modeling

## Sheet: Figure 8B
																																Figure 8B	OVX
																																	mV	Control							IbTx
																																	-60	-1.69966	-2.2761	-1.05335	1.37993	-2.55585			-1.49197	-1.96457	-0.67434	1.20744	-2.84195
																																	-50	-1.14865	-0.84559	0.634963	2.93234	2.28882			-0.71208	0.591278	3.91314	2.91907	-2.28882
																																	-40	0.983344	2.37147	1.60956	5.34721	3.94821			1.1105	2.42869	1.71784	4.69042	2.40326
																																	-30	2.93308	6.0908	3.78516	9.47372	7.57217			4.07325	6.31968	3.98205	8.02745	5.0354
																																	-20	8.58731	11.9273	8.96331	16.4331	18.7492			9.92245	12.6012	9.50475	14.3499	17.2234
																																	-10	21.4259	20.1797	21.7265	30.2522	43.8881			22.388	20.2878	20.1958	25.1438	38.662
																																	0	38.787	29.9708	43.4629	53.9829	77.4765			37.3289	29.0998	37.1576	40.124	63.076
																																	10	59.0049	40.0416	69.7474	82.7292	111.351			53.1133	38.3758	56.7086	56.5703	94.3947
																																	20	78.5912	50.9008	97.1788	115.781	146.866			70.2328	48.1923	77.7805	78.4302	118.561
																																	30	97.6859	62.9616	123.547	151.818	183.201			85.8476	58.1805	99.7728	92.7801	146.675
																																	40	115.848	74.7999	150.142	187.345	216.77			100.522	68.7281	121.16	111.734	178.928

## Sheet: Figure 8C
Figure 8C	OVX
	mV	OVX
	-60	-0.856188	-1.37329	-0.979516	-0.619888	3.1662
	-50	-0.864665	-1.21435	-3.60304	0.772476	3.05176
	-40	-1.01725	0.845591	-1.08288	1.0109	3.33786
	-30	-1.58098	1.11262	-1.10749	1.98364	5.0354
	-20	-2.98818	-1.33514	-1.3979	1.95503	5.26428
	-10	-2.42869	-1.43687	2.56446	4.75407	9.74655
	0	3.34422	1.43051	8.07731	11.2104	18.8446
	10	7.56582	3.06447	14.4171	19.8317	20.8283
	20	11.3297	4.09444	21.0079	31.0373	31.1279
	30	15.3944	5.83649	25.0786	43.9835	39.1769
	40	17.874	8.30332	31.1919	55.0938	43.1442

## Sheet: Figure 8E
Figure 8E	OVX+E2
	mV	Control								IbTx
	-60	-2.59399	0.832876	1.42024	0.729031	0.247047	-0.79346			-2.32152	-0.68029	-1.6902	-1.22918	0.145322	-0.88501
	-50	-1.36239	2.14895	2.48836	1.77171	1.42415	-0.295			1.2425	0.762939	-1.60804	-0.85619	1.12624	-0.50863
	-40	3.49862	4.09444	3.35693	2.98394	3.16075	1.2207			-17.4059	1.73569	1.85453	1.37329	2.58673	0.793457
	-30	9.00269	6.03994	8.1928	6.19676	6.87372	5.60506			8.73021	2.7593	4.5659	3.9249	4.96274	4.08936
	-20	27.4767	10.6939	19.2143	13.0124	15.1934	15.9404			25.9181	5.1562	13.9207	16.9457	9.94001	11.6374
	-10	61.7654	20.3959	44.7552	31.7891	28.7156	32.3486			52.403	11.9972	29.6373	22.4219	16.1598	21.3623
	0	106.495	38.2169	81.7871	60.7808	45.1224	53.5482			84.2067	19.8301	49.5089	35.8751	23.949	32.7962
	10	153.187	60.7427	123.432	96.1389	62.6192	79.7119			116.85	27.9299	71.6107	53.0328	31.702	44.7795
	20	199.291	85.3538	169.091	137.278	82.2013	105.754			146.027	37.2187	108.044	70.8177	40.0071	57.1899
	30	248.795	113.08	204.256	178.316	101.115	132.914			174.669	47.5883	121.495	88.3145	49.9035	72.8048
	40	297.034	141.125	232.603	222.88	122.027	157.786			208.806	57.7927	143.761	103.514	58.9789	84.5439

## Sheet: Figure 8F
Figure 8F
	mV	OVX							OVX+E2
	-60	-0.856188	-1.37329	-0.979516	-0.619888	3.1662			-1.54768	1.4178	2.60573	1.66999	0.101725	0.091553
	-50	-0.864665	-1.21435	-3.60304	0.772476	3.05176			1.76566	1.92006	2.86396	2.50075	0.29791	0.213623
	-40	-1.01725	0.845591	-1.08288	1.0109	3.33786			8.82281	3.01361	2.75832	3.06871	0.574021	0.427246
	-30	-1.58098	1.11262	-1.10749	1.98364	5.0354			2.07084	4.00543	4.91803	4.15378	1.91098	1.51571
	-20	-2.98818	-1.33514	-1.3979	1.95503	5.26428			3.66211	7.12077	7.79372	6.52737	5.25338	4.30298
	-10	-2.42869	-1.43687	2.56446	4.75407	9.74655			11.2806	10.376	17.395	14.9875	12.5558	10.9863
	0	3.34422	1.43051	8.07731	11.2104	18.8446			25.2533	37.1615	33.898	31.6196	21.1734	20.752
	10	7.56582	3.06447	14.4171	19.8317	20.8283			40.1742	34.2751	53.7931	57.3137	30.9172	34.9325
	20	11.3297	4.09444	21.0079	31.0373	31.1279			57.5038	49.928	74.5451	81.0835	42.1942	48.5636
	30	15.3944	5.83649	25.0786	43.9835	39.1769			78.2013	66.3885	86.6934	105.862	51.2114	60.1095
	40	17.874	8.30332	31.1919	55.0938	43.1442			90.4955	85.0296	92.3744	135.54	63.0479	73.2422

## Sheet: Figure 8G
Figure 8G
	OVX	E2
	1.11	1.645
	0.904	1.283
	1.169	1.945
	1.094	1.212
	1.001	1.745
Mean	1.056	1.566
SEM	0.04651	0.1392

## Sheet: Figure 8H
Voltage	Model-control	Data-control	Model-IbTx	Data-IbTx	Model-IbTx sens	Data-IbTx sens
-60	4.0852	0.097	4.085	-1.4803	0.0002	1.5773
-50	7.7047	1.2617	7.7037	-0.1147	0.001	1.3764
-40	8.5567	3.4835	8.5535	-3.1106	0.0032	6.5941
-30	13.1269	7.358	13.0669	4.9951	0.06	2.363
-20	22.1744	17.5993	21.6654	15.4852	0.5089	2.1141
-10	28.0162	39.6764	26.3018	29.1149	1.7145	10.5615
0	38.4222	71.8201	32.4602	47.3552	5.962	24.4649
10	69.6956	108.375	46.3819	67.3557	23.3136	41.0194
20	130.734	147.753	68.1564	90.5268	62.578	57.2266
30	184.128	186.112	87.4458	108.017	96.6822	78.0949
40	214.986	223.41	98.2391	128.468	116.747	94.942
