# Supplementary material for: Estradiol elicits distinct firing patterns in arcuate nucleus kisspeptin neurons of females through altering ion channel conductances
Source: eLife. 2024 Dec 13;13:RP96691. doi: 10.7554/eLife.96691 (PMC11643640; doi:10.7554/eLife.96691)
Supplement: Figure 12—source data 1. [file elife-96691-fig12-data1.xlsx]

## Sheet: Abstract
Estradiol elicits distinct firing patterns in arcuate nucleus kisspeptin neurons of females through altering ion channel conductances
Jian Qiu1, Margaritis Voliotis2,3, Martha A. Bosch1, Xiao Feng Li4, Larry S. Zweifel5,6, Krasimira Tsaneva-Atanasova 2,3, Kevin T. O’Byrne4 , Oline K. Rønnekleiv 1,7 and Martin J. Kelly 1,7
1Department of Chemical Physiology and Biochemistry, Oregon Health & Science U., Portland, OR 97239, USA
2Department of Mathematics and Statistics, University of Exeter, Stocker Rd, Exeter, EX4 4PY, UK
3Living Systems Institute, University of Exeter, Stocker Rd, Exeter, EX4 4PY, UK
4Department of Women and Children’s Health, School of Life Course and Population Sciences, King’s College London, Guy’s Campus, London SE1 1UL, UK
5Department of Psychiatry and Behavioral Sciences, University of Washington, Seattle, WA 98195, USA
6Depatment of Pharmacology, University of Washington, Seattle, WA 98195, USA
7Division of Neuroscience, Oregon National Primate Research Center, Beaverton, OR 97006, USA
Abstract
Hypothalamic kisspeptin (Kiss1) neurons are vital for pubertal development and reproduction. Arcuate nucleus Kiss1 (Kiss1ARH) neurons are responsible for the pulsatile release of Gonadotropin-releasing Hormone (GnRH). In females, the behavior of Kiss1ARH neurons, expressing Kiss1, Neurokinin B (NKB), and Dynorphin (Dyn), varies throughout the ovarian cycle. Studies indicate that 17β-estradiol (E2…
Keywords: Kisspeptin; Arcuate nucleus; 17β-estradiol; Ion channels; Synchronous firing; Burst firing; Mathematical modeling

## Sheet: Figure 12C
Figure 12C
	Cntrl	Trpc5Mut
	17.27	7.7
	16.17	4.9
	15.23	1.3
	16.11	5
	26	19.2
	15.5	0.5
	27.68	10.02
	19.81	8.1
	35.92	6.44
	24.5	12.74
	18.31
	32.56
	19.84
	18.22
	39.89
	27.83
	23.8
	18.22
	25.4
Mean	23.07	7.59
SEM	1.656	1.74

## Sheet: Figure 12D
Figure 12D
	Cntrl	Trpc5Mut
	-71	-66
	-73	-72
	-65	-79
	-69	-67
	-66	-70
	-77	-62
	-62	-76
	-64	-75
	-50	-71
	-62	-50
	-71	-73
	-61	-77
	-70	-63
	-70	-79
	-46	-69
	-62	-73
	-67	-76
	-73	-67
	-59	-76
	-70	-62
	-62	-68
	-76	-66
	-56	-58
	-51	-78
	-47	-71
	-68	-73
	-71	-77
	-71	-76
	-69	-66
	-71	-66
	-74	-77
	-52	-87
	-70	-75
	-76	-73
	-53	-79
	-65	-77
	-52	-59
		-73
Mean	-64.65	-71.11
SEM	1.417	1.168

## Sheet: Figure 12E
Figure 12E
	Cntrl	Trpc5Mut
	36.8	38.34
	33.64	37.24
	23.44	37.28
	31.56	30.1
	37.42	40.72
	33.7	41.68
	34.36	40.84
	36.14	26.98
	31.18	33.7
	37.56	27.52
	25.4	25.94
	43.46	34.72
	38.7	29.78
	25.02	33.44
	29.06	41.14
	38.94	36.92
	22.76	40.58
	35.7	39
	30.4	40.16
	27.04	30.64
	38.02	42.12
	30.64	36.74
	25.32	36.62
	24.16	38.88
	25.14	28.2
	42.42	38.52
	25.58	45.1
	19.54	29.06
	19.4	31.74
	28.26	42.84
	33.26	28.32
		37.3
		24.04
Mean	31.1	35.34
SEM	1.174	0.9878

## Sheet: Figure 12F
Figure 12F
	mV	Cntrl
	0	0	0	0	0	0	0	0	0	0	0	0	0	0	0	0	0	0	0	0	0	0	0	0	0	0	0
	15	0	0	2	2	11	10	28	0	7	10	0	21	7	0	20	22	0	11	23	0	0	23	18	18	13	2
	30	11	7	27	17	37	27	46	12	23	30	6	43	21	3	35	43	13	28	38	0	0	49	36	44	39	24
	45	28	39	48	28	69	44	63	23	39	53	31	58	40	16	46	57	30	43	50	1	8	71	52	67	59	37
	60	47	55	64	38	89	59	74	31	53	70	52	73	54	32	54	67	52	59	58	6	32	83	64	81	74	54
	75	63	73	76	45	109	74	85	38	60	89	65	81	66	45	62	72	66	70	69	14	46	93	79	95	90	65
	90	78	92	85	53	126	84	95	46	73	100	81	87	71	57	68	77	72	78	79	19	61	102	88	106	101	73
	105	90	105	92	59	137	94	98	51	82	110	93	93	77	65	75	80	80	84	86	21	74	109	96	115	118	86
	120	97	119	101	67	146	106	57	28	91	120	105	97	79	69	79	77	90	91	92	27	85	115	104	127	124	93
	mV	Trpc5Mut
	0	0	0	0	0	0	0	0	0	0	0	0	0	0	0	0	0	0	0	0	0	0	0	0	0	0	0	0	0
	15	0	0	10	0	4	20	0	0	0	0	4	0	2	0	0	0	0	0	0	1	6	0	1	7	0	0	0	0
	30	0	6	31	1	22	52	11	6	8	13	26	0	2	4	0	0	0	0	0	16	24	0	17	32	1	1	1	3
	45	1	21	43	11	39	77	27	35	21	29	46	0	17	16	0	0	4	0	0	32	40	0	29	52	13	0	7	14
	60	4	34	51	31	56	97	43	59	36	38	64	0	38	30	0	0	17	0	0	44	53	0	43	66	29	5	39	30
	75	12	44	61	49	72	115	60	74	50	49	80	0	50	40	0	3	27	2	9	54	62	2	53	80	39	7	59	40
	90	22	53	67	65	85	128	75	94	59	59	97	0	68	52	1	17	41	9	23	63	73	7	63	90	50	12	72	48
	105	31	60	73	80	99	137	91	109	68	69	113	1	86	64	2	81	48	30	24	74	81	35	71	100	57	16	86	56
	120	38	67	81	89	109	148	101	122	78	79	119	4	89	76	8	47	57	35	47	85	90	35	79	108	65	19	97	63

## Sheet: Figure 12H
Figure 12H
Current	Firing control	firing TRPC5 mut
0	0	0
15	11.7188	0
30	15.873	11.9048
45	19.0476	14.4231
60	21.8978	17.7778
75	24.5902	20.5761
90	27.2109	23.3645
105	30.0752	25.7511
