# Supplementary material for: Estradiol elicits distinct firing patterns in arcuate nucleus kisspeptin neurons of females through altering ion channel conductances
Source: eLife. 2024 Dec 13;13:RP96691. doi: 10.7554/eLife.96691 (PMC11643640; doi:10.7554/eLife.96691)
Supplement: Figure 13—source data 1. [file elife-96691-fig13-data1.xlsx]

## Sheet: Abstract
Estradiol elicits distinct firing patterns in arcuate nucleus kisspeptin neurons of females through altering ion channel conductances
Jian Qiu1, Margaritis Voliotis2,3, Martha A. Bosch1, Xiao Feng Li4, Larry S. Zweifel5,6, Krasimira Tsaneva-Atanasova 2,3, Kevin T. O’Byrne4 , Oline K. Rønnekleiv 1,7 and Martin J. Kelly 1,7
1Department of Chemical Physiology and Biochemistry, Oregon Health & Science U., Portland, OR 97239, USA
2Department of Mathematics and Statistics, University of Exeter, Stocker Rd, Exeter, EX4 4PY, UK
3Living Systems Institute, University of Exeter, Stocker Rd, Exeter, EX4 4PY, UK
4Department of Women and Children’s Health, School of Life Course and Population Sciences, King’s College London, Guy’s Campus, London SE1 1UL, UK
5Department of Psychiatry and Behavioral Sciences, University of Washington, Seattle, WA 98195, USA
6Depatment of Pharmacology, University of Washington, Seattle, WA 98195, USA
7Division of Neuroscience, Oregon National Primate Research Center, Beaverton, OR 97006, USA
Abstract
Hypothalamic kisspeptin (Kiss1) neurons are vital for pubertal development and reproduction. Arcuate nucleus Kiss1 (Kiss1ARH) neurons are responsible for the pulsatile release of Gonadotropin-releasing Hormone (GnRH). In females, the behavior of Kiss1ARH neurons, expressing Kiss1, Neurokinin B (NKB), and Dynorphin (Dyn), varies throughout the ovarian cycle. Studies indicate that 17β-estradiol (E2…
Keywords: Kisspeptin; Arcuate nucleus; 17β-estradiol; Ion channels; Synchronous firing; Burst firing; Mathematical modeling

## Sheet: Figure 13A
Figure 13 A1										Figure 13 A2
Time	Voltage									Time	Voltage
0	-62.007									0	-69.521
0.001	-62.007									0.001	-69.521
0.002	-62.007									0.002	-69.521
0.003	-62.006									0.003	-69.521
0.004	-62.006									0.004	-69.521
0.005	-62.006									0.005	-69.521
0.006	-62.006									0.006	-69.521
0.007	-62.005									0.007	-69.521
0.008	-62.005									0.008	-69.521
0.009	-62.005									0.009	-69.521
0.01	-62.004									0.01	-69.521
0.011	-62.004									0.011	-69.521
0.012	-62.004									0.012	-69.521
0.013	-62.004									0.013	-69.521
0.014	-62.003									0.014	-69.521
0.015	-62.003									0.015	-69.521
0.016	-62.003									0.016	-69.521
0.017	-62.003									0.017	-69.521
0.018	-62.002									0.018	-69.521
0.019	-62.002									0.019	-69.521
0.02	-62.002									0.02	-69.521
0.021	-62.002									0.021	-69.521
0.022	-62.001									0.022	-69.521
0.023	-62.001									0.023	-69.521
0.024	-62.001									0.024	-69.521
0.025	-62.001									0.025	-69.521
0.026	-62									0.026	-69.521
0.027	-62									0.027	-69.521
0.028	-62									0.028	-69.52
0.029	-62									0.029	-69.52
0.03	-61.999									0.03	-69.52
0.031	-61.999									0.031	-69.52
0.032	-61.999									0.032	-69.52
0.033	-61.999									0.033	-69.52
0.034	-61.998									0.034	-69.52
0.035	-61.998									0.035	-69.52
0.036	-61.998									0.036	-69.52
0.037	-61.998									0.037	-69.52
0.038	-61.997									0.038	-69.52
0.039	-61.997									0.039	-69.52
0.04	-61.997									0.04	-69.52
0.041	-61.997									0.041	-69.52
0.042	-61.996									0.042	-69.52
0.043	-61.996									0.043	-69.52
0.044	-61.996									0.044	-69.52
0.045	-61.996									0.045	-69.52
0.046	-61.995									0.046	-69.52
0.047	-61.995									0.047	-69.52
0.048	-61.995									0.048	-69.52
0.049	-61.995									0.049	-69.52
0.05	-61.994									0.05	-69.52
0.051	-61.994									0.051	-69.52
0.052	-61.994									0.052	-69.52
0.053	-61.994									0.053	-69.52
0.054	-61.994									0.054	-69.52
0.055	-61.993									0.055	-69.52
0.056	-61.993									0.056	-69.52
0.057	-61.993									0.057	-69.52
0.058	-61.993									0.058	-69.52
0.059	-61.992									0.059	-69.52
0.06	-61.992									0.06	-69.52
0.061	-61.992									0.061	-69.52
0.062	-61.992									0.062	-69.52
0.063	-61.991									0.063	-69.52
0.064	-61.991									0.064	-69.52
0.065	-61.991									0.065	-69.52
0.066	-61.991									0.066	-69.52
0.067	-61.99									0.067	-69.52
0.068	-61.99									0.068	-69.52
0.069	-61.99									0.069	-69.52
0.07	-61.99									0.07	-69.52
0.071	-61.99									0.071	-69.52
0.072	-61.989									0.072	-69.52
0.073	-61.989									0.073	-69.52
0.074	-61.989									0.074	-69.52
0.075	-61.989									0.075	-69.52
0.076	-61.988									0.076	-69.52
0.077	-61.988									0.077	-69.52
0.078	-61.988									0.078	-69.52
0.079	-61.988									0.079	-69.52
0.08	-61.987									0.08	-69.52
0.081	-61.987									0.081	-69.52
0.082	-61.987									0.082	-69.52
0.083	-61.987									0.083	-69.52
0.084	-61.987									0.084	-69.52
0.085	-61.986									0.085	-69.52
0.086	-61.986									0.086	-69.52
0.087	-61.986									0.087	-69.52
0.088	-61.986									0.088	-69.52
0.089	-61.985									0.089	-69.52
0.09	-61.985									0.09	-69.52
0.091	-61.985									0.091	-69.52
0.092	-61.985									0.092	-69.52
0.093	-61.985									0.093	-69.52
0.094	-61.984									0.094	-69.52
0.095	-61.984									0.095	-69.52
0.096	-61.984									0.096	-69.52
0.097	-61.984									0.097	-69.52
0.098	-61.983									0.098	-69.52
0.099	-61.983									0.099	-69.52
0.1	-61.983									0.1	-69.52
0.101	-61.983									0.101	-69.52
0.102	-61.983									0.102	-69.52
0.103	-61.982									0.103	-69.52
0.104	-61.982									0.104	-69.52
0.105	-61.982									0.105	-69.52
0.106	-61.982									0.106	-69.52
0.107	-61.982									0.107	-69.52
0.108	-61.981									0.108	-69.52
0.109	-61.981									0.109	-69.52
0.11	-61.981									0.11	-69.52
0.111	-61.981									0.111	-69.52
0.112	-61.98									0.112	-69.52
0.113	-61.98									0.113	-69.52
0.114	-61.98									0.114	-69.52
0.115	-61.98									0.115	-69.52
0.116	-61.98									0.116	-69.52
0.117	-61.979									0.117	-69.52
0.118	-61.979									0.118	-69.52
0.119	-61.979									0.119	-69.52
0.12	-61.979									0.12	-69.52
0.121	-61.979									0.121	-69.52
0.122	-61.978									0.122	-69.52
0.123	-61.978									0.123	-69.52
0.124	-61.978									0.124	-69.52
0.125	-61.978									0.125	-69.519
0.126	-61.977									0.126	-69.519
0.127	-61.977									0.127	-69.519
0.128	-61.977									0.128	-69.519
0.129	-61.977									0.129	-69.519
0.13	-61.977									0.13	-69.519
0.131	-61.976									0.131	-69.519
0.132	-61.976									0.132	-69.519
0.133	-61.976									0.133	-69.519
0.134	-61.976									0.134	-69.519
0.135	-61.976									0.135	-69.519
0.136	-61.975									0.136	-69.519
0.137	-61.975									0.137	-69.519
0.138	-61.975									0.138	-69.519
0.139	-61.975									0.139	-69.519
0.14	-61.975									0.14	-69.519
0.141	-61.974									0.141	-69.519
0.142	-61.974									0.142	-69.519
0.143	-61.974									0.143	-69.519
0.144	-61.974									0.144	-69.519
0.145	-61.974									0.145	-69.519
0.146	-61.973									0.146	-69.519
0.147	-61.973									0.147	-69.519
0.148	-61.973									0.148	-69.519
0.149	-61.973									0.149	-69.519
0.15	-61.973									0.15	-69.519
0.151	-61.972									0.151	-69.519
0.152	-61.972									0.152	-69.519
0.153	-61.972									0.153	-69.519
0.154	-61.972									0.154	-69.519
0.155	-61.972									0.155	-69.519
0.156	-61.971									0.156	-69.519
0.157	-61.971									0.157	-69.519
0.158	-61.971									0.158	-69.519
0.159	-61.971									0.159	-69.519
0.16	-61.971									0.16	-69.519
0.161	-61.97									0.161	-69.519
0.162	-61.97									0.162	-69.519
0.163	-61.97									0.163	-69.519
0.164	-61.97									0.164	-69.519
0.165	-61.97									0.165	-69.519
0.166	-61.97									0.166	-69.519
0.167	-61.969									0.167	-69.519
0.168	-61.969									0.168	-69.519
0.169	-61.969									0.169	-69.519
0.17	-61.969									0.17	-69.519
0.171	-61.969									0.171	-69.519
0.172	-61.968									0.172	-69.519
0.173	-61.968									0.173	-69.519
0.174	-61.968									0.174	-69.519
0.175	-61.968									0.175	-69.519
0.176	-61.968									0.176	-69.519
0.177	-61.967									0.177	-69.519
0.178	-61.967									0.178	-69.519
0.179	-61.967									0.179	-69.519
0.18	-61.967									0.18	-69.519
0.181	-61.967									0.181	-69.519
0.182	-61.966									0.182	-69.519
0.183	-61.966									0.183	-69.519
0.184	-61.966									0.184	-69.519
0.185	-61.966									0.185	-69.519
0.186	-61.966									0.186	-69.519
0.187	-61.966									0.187	-69.519
0.188	-61.965									0.188	-69.519
0.189	-61.965									0.189	-69.519
0.19	-61.965									0.19	-69.519
0.191	-61.965									0.191	-69.519
0.192	-61.965									0.192	-69.519
0.193	-61.964									0.193	-69.519
0.194	-61.964									0.194	-69.519
0.195	-61.964									0.195	-69.519
0.196	-61.964									0.196	-69.519
0.197	-61.964									0.197	-69.519
0.198	-61.964									0.198	-69.519
0.199	-61.963									0.199	-69.519
0.2	-61.963									0.2	-69.519
0.201	-61.963									0.201	-69.519
0.202	-61.963									0.202	-69.519
0.203	-61.963									0.203	-69.519
0.204	-61.962									0.204	-69.519
0.205	-61.962									0.205	-69.519
0.206	-61.962									0.206	-69.519
0.207	-61.962									0.207	-69.519
0.208	-61.962									0.208	-69.519
0.209	-61.962									0.209	-69.519
0.21	-61.961									0.21	-69.519
0.211	-61.961									0.211	-69.519
0.212	-61.961									0.212	-69.519
0.213	-61.961									0.213	-69.519
0.214	-61.961									0.214	-69.519
0.215	-61.961									0.215	-69.519
0.216	-61.96									0.216	-69.519
0.217	-61.96									0.217	-69.519
0.218	-61.96									0.218	-69.519
0.219	-61.96									0.219	-69.519
0.22	-61.96									0.22	-69.519
0.221	-61.96									0.221	-69.519
0.222	-61.959									0.222	-69.519
0.223	-61.959									0.223	-69.519
0.224	-61.959									0.224	-69.519
0.225	-61.959									0.225	-69.519
0.226	-61.959									0.226	-69.519
0.227	-61.958									0.227	-69.519
0.228	-61.958									0.228	-69.519
0.229	-61.958									0.229	-69.519
0.23	-61.958									0.23	-69.519
0.231	-61.958									0.231	-69.519
0.232	-61.958									0.232	-69.519
0.233	-61.957									0.233	-69.519
0.234	-61.957									0.234	-69.519
0.235	-61.957									0.235	-69.519
0.236	-61.957									0.236	-69.519
0.237	-61.957									0.237	-69.519
0.238	-61.957									0.238	-69.519
0.239	-61.956									0.239	-69.519
0.24	-61.956									0.24	-69.519
0.241	-61.956									0.241	-69.519
0.242	-61.956									0.242	-69.519
0.243	-61.956									0.243	-69.519
0.244	-61.956									0.244	-69.519
0.245	-61.955									0.245	-69.519
0.246	-61.955									0.246	-69.519
0.247	-61.955									0.247	-69.519
0.248	-61.955									0.248	-69.519
0.249	-61.955									0.249	-69.519
0.25	-61.955									0.25	-69.519
0.251	-61.954									0.251	-69.519
0.252	-61.954									0.252	-69.519
0.253	-61.954									0.253	-69.519
0.254	-61.954									0.254	-69.519
0.255	-61.954									0.255	-69.519
0.256	-61.954									0.256	-69.519
0.257	-61.954									0.257	-69.519
0.258	-61.953									0.258	-69.519
0.259	-61.953									0.259	-69.519
0.26	-61.953									0.26	-69.519
0.261	-61.953									0.261	-69.519
0.262	-61.953									0.262	-69.519
0.263	-61.953									0.263	-69.519
0.264	-61.952									0.264	-69.519
0.265	-61.952									0.265	-69.519
0.266	-61.952									0.266	-69.519
0.267	-61.952									0.267	-69.519
0.268	-61.952									0.268	-69.519
0.269	-61.952									0.269	-69.519
0.27	-61.951									0.27	-69.519
0.271	-61.951									0.271	-69.519
0.272	-61.951									0.272	-69.519
0.273	-61.951									0.273	-69.519
0.274	-61.951									0.274	-69.519
0.275	-61.951									0.275	-69.519
0.276	-61.951									0.276	-69.519
0.277	-61.95									0.277	-69.519
0.278	-61.95									0.278	-69.519
0.279	-61.95									0.279	-69.519
0.28	-61.95									0.28	-69.519
0.281	-61.95									0.281	-69.519
0.282	-61.95									0.282	-69.519
0.283	-61.949									0.283	-69.519
0.284	-61.949									0.284	-69.519
0.285	-61.949									0.285	-69.519
0.286	-61.949									0.286	-69.519
0.287	-61.949									0.287	-69.518
0.288	-61.949									0.288	-69.518
0.289	-61.949									0.289	-69.518
0.29	-61.948									0.29	-69.518
0.291	-61.948									0.291	-69.518
0.292	-61.948									0.292	-69.518
0.293	-61.948									0.293	-69.518
0.294	-61.948									0.294	-69.518
0.295	-61.948									0.295	-69.518
0.296	-61.947									0.296	-69.518
0.297	-61.947									0.297	-69.518
0.298	-61.947									0.298	-69.518
0.299	-61.947									0.299	-69.518
0.3	-61.947									0.3	-69.518
0.301	-61.947									0.301	-69.518
0.302	-61.947									0.302	-69.518
0.303	-61.946									0.303	-69.518
0.304	-61.946									0.304	-69.518
0.305	-61.946									0.305	-69.518
0.306	-61.946									0.306	-69.518
0.307	-61.946									0.307	-69.518
0.308	-61.946									0.308	-69.518
0.309	-61.946									0.309	-69.518
0.31	-61.945									0.31	-69.518
0.311	-61.945									0.311	-69.518
0.312	-61.945									0.312	-69.518
0.313	-61.945									0.313	-69.518
0.314	-61.945									0.314	-69.518
0.315	-61.945									0.315	-69.518
0.316	-61.945									0.316	-69.518
0.317	-61.944									0.317	-69.518
0.318	-61.944									0.318	-69.518
0.319	-61.944									0.319	-69.518
0.32	-61.944									0.32	-69.518
0.321	-61.944									0.321	-69.518
0.322	-61.944									0.322	-69.518
0.323	-61.944									0.323	-69.518
0.324	-61.943									0.324	-69.518
0.325	-61.943									0.325	-69.518
0.326	-61.943									0.326	-69.518
0.327	-61.943									0.327	-69.518
0.328	-61.943									0.328	-69.518
0.329	-61.943									0.329	-69.518
0.33	-61.943									0.33	-69.518
0.331	-61.942									0.331	-69.518
0.332	-61.942									0.332	-69.518
0.333	-61.942									0.333	-69.518
0.334	-61.942									0.334	-69.518
0.335	-61.942									0.335	-69.518
0.336	-61.942									0.336	-69.518
0.337	-61.942									0.337	-69.518
0.338	-61.941									0.338	-69.518
0.339	-61.941									0.339	-69.518
0.34	-61.941									0.34	-69.518
0.341	-61.941									0.341	-69.518
0.342	-61.941									0.342	-69.518
0.343	-61.941									0.343	-69.518
0.344	-61.941									0.344	-69.518
0.345	-61.94									0.345	-69.518
0.346	-61.94									0.346	-69.518
0.347	-61.94									0.347	-69.518
0.348	-61.94									0.348	-69.518
0.349	-61.94									0.349	-69.518
0.35	-61.94									0.35	-69.518
0.351	-61.94									0.351	-69.518
0.352	-61.94									0.352	-69.518
0.353	-61.939									0.353	-69.518
0.354	-61.939									0.354	-69.518
0.355	-61.939									0.355	-69.518
0.356	-61.939									0.356	-69.518
0.357	-61.939									0.357	-69.518
0.358	-61.939									0.358	-69.518
0.359	-61.939									0.359	-69.518
0.36	-61.938									0.36	-69.518
0.361	-61.938									0.361	-69.518
0.362	-61.938									0.362	-69.518
0.363	-61.938									0.363	-69.518
0.364	-61.938									0.364	-69.518
0.365	-61.938									0.365	-69.518
0.366	-61.938									0.366	-69.518
0.367	-61.938									0.367	-69.518
0.368	-61.937									0.368	-69.518
0.369	-61.937									0.369	-69.518
0.37	-61.937									0.37	-69.518
0.371	-61.937									0.371	-69.518
0.372	-61.937									0.372	-69.518
0.373	-61.937									0.373	-69.518
0.374	-61.937									0.374	-69.518
0.375	-61.936									0.375	-69.518
0.376	-61.936									0.376	-69.518
0.377	-61.936									0.377	-69.518
0.378	-61.936									0.378	-69.518
0.379	-61.936									0.379	-69.518
0.38	-61.936									0.38	-69.518
0.381	-61.936									0.381	-69.518
0.382	-61.936									0.382	-69.518
0.383	-61.935									0.383	-69.518
0.384	-61.935									0.384	-69.518
0.385	-61.935									0.385	-69.518
0.386	-61.935									0.386	-69.518
0.387	-61.935									0.387	-69.518
0.388	-61.935									0.388	-69.518
0.389	-61.935									0.389	-69.518
0.39	-61.935									0.39	-69.518
0.391	-61.934									0.391	-69.518
0.392	-61.934									0.392	-69.518
0.393	-61.934									0.393	-69.518
0.394	-61.934									0.394	-69.518
0.395	-61.934									0.395	-69.518
0.396	-61.934									0.396	-69.518
0.397	-61.934									0.397	-69.518
0.398	-61.934									0.398	-69.518
0.399	-61.933									0.399	-69.518
0.4	-61.933									0.4	-69.518
0.401	-61.933									0.401	-69.518
0.402	-61.933									0.402	-69.518
0.403	-61.933									0.403	-69.518
0.404	-61.933									0.404	-69.518
0.405	-61.933									0.405	-69.518
0.406	-61.933									0.406	-69.518
0.407	-61.932									0.407	-69.518
0.408	-61.932									0.408	-69.518
0.409	-61.932									0.409	-69.518
0.41	-61.932									0.41	-69.518
0.411	-61.932									0.411	-69.518
0.412	-61.932									0.412	-69.518
0.413	-61.932									0.413	-69.518
0.414	-61.932									0.414	-69.518
0.415	-61.931									0.415	-69.518
0.416	-61.931									0.416	-69.518
0.417	-61.931									0.417	-69.518
0.418	-61.931									0.418	-69.518
0.419	-61.931									0.419	-69.518
0.42	-61.931									0.42	-69.518
0.421	-61.931									0.421	-69.518
0.422	-61.931									0.422	-69.518
0.423	-61.931									0.423	-69.518
0.424	-61.93									0.424	-69.518
0.425	-61.93									0.425	-69.518
0.426	-61.93									0.426	-69.518
0.427	-61.93									0.427	-69.518
0.428	-61.93									0.428	-69.518
0.429	-61.93									0.429	-69.518
0.43	-61.93									0.43	-69.518
0.431	-61.93									0.431	-69.518
0.432	-61.929									0.432	-69.518
0.433	-61.929									0.433	-69.518
0.434	-61.929									0.434	-69.518
0.435	-61.929									0.435	-69.518
0.436	-61.929									0.436	-69.518
0.437	-61.929									0.437	-69.518
0.438	-61.929									0.438	-69.518
0.439	-61.929									0.439	-69.518
0.44	-61.929									0.44	-69.518
0.441	-61.928									0.441	-69.518
0.442	-61.928									0.442	-69.518
0.443	-61.928									0.443	-69.518
0.444	-61.928									0.444	-69.518
0.445	-61.928									0.445	-69.518
0.446	-61.928									0.446	-69.518
0.447	-61.928									0.447	-69.518
0.448	-61.928									0.448	-69.518
0.449	-61.928									0.449	-69.518
0.45	-61.927									0.45	-69.518
0.451	-61.927									0.451	-69.518
0.452	-61.927									0.452	-69.518
0.453	-61.927									0.453	-69.518
0.454	-61.927									0.454	-69.518
0.455	-61.927									0.455	-69.518
0.456	-61.927									0.456	-69.518
0.457	-61.927									0.457	-69.518
0.458	-61.927									0.458	-69.518
0.459	-61.926									0.459	-69.518
0.46	-61.926									0.46	-69.518
0.461	-61.926									0.461	-69.518
0.462	-61.926									0.462	-69.518
0.463	-61.926									0.463	-69.518
0.464	-61.926									0.464	-69.518
0.465	-61.926									0.465	-69.518
0.466	-61.926									0.466	-69.518
0.467	-61.926									0.467	-69.518
0.468	-61.925									0.468	-69.518
0.469	-61.925									0.469	-69.518
0.47	-61.925									0.47	-69.518
0.471	-61.925									0.471	-69.518
0.472	-61.925									0.472	-69.518
0.473	-61.925									0.473	-69.518
0.474	-61.925									0.474	-69.518
0.475	-61.925									0.475	-69.518
0.476	-61.925									0.476	-69.518
0.477	-61.924									0.477	-69.518
0.478	-61.924									0.478	-69.518
0.479	-61.924									0.479	-69.518
0.48	-61.924									0.48	-69.518
0.481	-61.924									0.481	-69.518
0.482	-61.924									0.482	-69.518
0.483	-61.924									0.483	-69.518
0.484	-61.924									0.484	-69.518
0.485	-61.924									0.485	-69.518
0.486	-61.923									0.486	-69.518
0.487	-61.923									0.487	-69.518
0.488	-61.923									0.488	-69.518
0.489	-61.923									0.489	-69.518
0.49	-61.923									0.49	-69.518
0.491	-61.923									0.491	-69.518
0.492	-61.923									0.492	-69.518
0.493	-61.923									0.493	-69.518
0.494	-61.923									0.494	-69.518
0.495	-61.923									0.495	-69.518
0.496	-61.922									0.496	-69.518
0.497	-61.922									0.497	-69.518
0.498	-61.922									0.498	-69.518
0.499	-61.922									0.499	-69.518
0.5	-61.922									0.5	-69.518
0.501	-61.922									0.501	-69.518
0.502	-61.922									0.502	-69.518
0.503	-61.922									0.503	-69.518
0.504	-61.922									0.504	-69.518
0.505	-61.922									0.505	-69.518
0.506	-61.921									0.506	-69.518
0.507	-61.921									0.507	-69.518
0.508	-61.921									0.508	-69.518
0.509	-61.921									0.509	-69.518
0.51	-61.921									0.51	-69.518
0.511	-61.921									0.511	-69.518
0.512	-61.921									0.512	-69.518
0.513	-61.921									0.513	-69.518
0.514	-61.921									0.514	-69.518
0.515	-61.92									0.515	-69.518
0.516	-61.92									0.516	-69.518
0.517	-61.92									0.517	-69.518
0.518	-61.92									0.518	-69.518
0.519	-61.92									0.519	-69.518
0.52	-61.92									0.52	-69.518
0.521	-61.92									0.521	-69.518
0.522	-61.92									0.522	-69.518
0.523	-61.92									0.523	-69.518
0.524	-61.92									0.524	-69.518
0.525	-61.919									0.525	-69.518
0.526	-61.919									0.526	-69.518
0.527	-61.919									0.527	-69.518
0.528	-61.919									0.528	-69.518
0.529	-61.919									0.529	-69.518
0.53	-61.919									0.53	-69.518
0.531	-61.919									0.531	-69.518
0.532	-61.919									0.532	-69.518
0.533	-61.919									0.533	-69.518
0.534	-61.919									0.534	-69.518
0.535	-61.919									0.535	-69.518
0.536	-61.918									0.536	-69.518
0.537	-61.918									0.537	-69.518
0.538	-61.918									0.538	-69.518
0.539	-61.918									0.539	-69.518
0.54	-61.918									0.54	-69.518
0.541	-61.918									0.541	-69.518
0.542	-61.918									0.542	-69.518
0.543	-61.918									0.543	-69.518
0.544	-61.918									0.544	-69.518
0.545	-61.918									0.545	-69.518
0.546	-61.917									0.546	-69.518
0.547	-61.917									0.547	-69.518
0.548	-61.917									0.548	-69.518
0.549	-61.917									0.549	-69.518
0.55	-61.917									0.55	-69.518
0.551	-61.917									0.551	-69.518
0.552	-61.917									0.552	-69.518
0.553	-61.917									0.553	-69.518
0.554	-61.917									0.554	-69.518
0.555	-61.917									0.555	-69.518
0.556	-61.917									0.556	-69.518
0.557	-61.916									0.557	-69.518
0.558	-61.916									0.558	-69.518
0.559	-61.916									0.559	-69.518
0.56	-61.916									0.56	-69.518
0.561	-61.916									0.561	-69.518
0.562	-61.916									0.562	-69.518
0.563	-61.916									0.563	-69.518
0.564	-61.916									0.564	-69.518
0.565	-61.916									0.565	-69.518
0.566	-61.916									0.566	-69.518
0.567	-61.915									0.567	-69.518
0.568	-61.915									0.568	-69.518
0.569	-61.915									0.569	-69.518
0.57	-61.915									0.57	-69.518
0.571	-61.915									0.571	-69.518
0.572	-61.915									0.572	-69.518
0.573	-61.915									0.573	-69.518
0.574	-61.915									0.574	-69.518
0.575	-61.915									0.575	-69.518
0.576	-61.915									0.576	-69.518
0.577	-61.915									0.577	-69.518
0.578	-61.914									0.578	-69.518
0.579	-61.914									0.579	-69.518
0.58	-61.914									0.58	-69.518
0.581	-61.914									0.581	-69.518
0.582	-61.914									0.582	-69.518
0.583	-61.914									0.583	-69.518
0.584	-61.914									0.584	-69.518
0.585	-61.914									0.585	-69.518
0.586	-61.914									0.586	-69.518
0.587	-61.914									0.587	-69.518
0.588	-61.914									0.588	-69.518
0.589	-61.914									0.589	-69.518
0.59	-61.913									0.59	-69.518
0.591	-61.913									0.591	-69.518
0.592	-61.913									0.592	-69.518
0.593	-61.913									0.593	-69.518
0.594	-61.913									0.594	-69.518
0.595	-61.913									0.595	-69.518
0.596	-61.913									0.596	-69.518
0.597	-61.913									0.597	-69.518
0.598	-61.913									0.598	-69.518
0.599	-61.913									0.599	-69.518
0.6	-61.913									0.6	-69.518
0.601	-61.912									0.601	-69.518
0.602	-61.912									0.602	-69.518
0.603	-61.912									0.603	-69.518
0.604	-61.912									0.604	-69.518
0.605	-61.912									0.605	-69.518
0.606	-61.912									0.606	-69.518
0.607	-61.912									0.607	-69.518
0.608	-61.912									0.608	-69.518
0.609	-61.912									0.609	-69.518
0.61	-61.912									0.61	-69.518
0.611	-61.912									0.611	-69.518
0.612	-61.912									0.612	-69.518
0.613	-61.911									0.613	-69.518
0.614	-61.911									0.614	-69.518
0.615	-61.911									0.615	-69.518
0.616	-61.911									0.616	-69.518
0.617	-61.911									0.617	-69.518
0.618	-61.911									0.618	-69.518
0.619	-61.911									0.619	-69.518
0.62	-61.911									0.62	-69.518
0.621	-61.911									0.621	-69.518
0.622	-61.911									0.622	-69.518
0.623	-61.911									0.623	-69.518
0.624	-61.911									0.624	-69.518
0.625	-61.91									0.625	-69.518
0.626	-61.91									0.626	-69.518
0.627	-61.91									0.627	-69.518
0.628	-61.91									0.628	-69.518
0.629	-61.91									0.629	-69.518
0.63	-61.91									0.63	-69.518
0.631	-61.91									0.631	-69.518
0.632	-61.91									0.632	-69.518
0.633	-61.91									0.633	-69.518
0.634	-61.91									0.634	-69.518
0.635	-61.91									0.635	-69.518
0.636	-61.91									0.636	-69.518
0.637	-61.909									0.637	-69.518
0.638	-61.909									0.638	-69.518
0.639	-61.909									0.639	-69.518
0.64	-61.909									0.64	-69.518
0.641	-61.909									0.641	-69.518
0.642	-61.909									0.642	-69.518
0.643	-61.909									0.643	-69.518
0.644	-61.909									0.644	-69.518
0.645	-61.909									0.645	-69.518
0.646	-61.909									0.646	-69.518
0.647	-61.909									0.647	-69.518
0.648	-61.909									0.648	-69.518
0.649	-61.908									0.649	-69.518
0.65	-61.908									0.65	-69.518
0.651	-61.908									0.651	-69.518
0.652	-61.908									0.652	-69.518
0.653	-61.908									0.653	-69.518
0.654	-61.908									0.654	-69.518
0.655	-61.908									0.655	-69.518
0.656	-61.908									0.656	-69.518
0.657	-61.908									0.657	-69.518
0.658	-61.908									0.658	-69.518
0.659	-61.908									0.659	-69.518
0.66	-61.908									0.66	-69.518
0.661	-61.908									0.661	-69.518
0.662	-61.907									0.662	-69.518
0.663	-61.907									0.663	-69.518
0.664	-61.907									0.664	-69.518
0.665	-61.907									0.665	-69.518
0.666	-61.907									0.666	-69.518
0.667	-61.907									0.667	-69.518
0.668	-61.907									0.668	-69.518
0.669	-61.907									0.669	-69.518
0.67	-61.907									0.67	-69.518
0.671	-61.907									0.671	-69.518
0.672	-61.907									0.672	-69.518
0.673	-61.907									0.673	-69.518
0.674	-61.907									0.674	-69.518
0.675	-61.906									0.675	-69.518
0.676	-61.906									0.676	-69.518
0.677	-61.906									0.677	-69.518
0.678	-61.906									0.678	-69.518
0.679	-61.906									0.679	-69.518
0.68	-61.906									0.68	-69.518
0.681	-61.906									0.681	-69.518
0.682	-61.906									0.682	-69.518
0.683	-61.906									0.683	-69.518
0.684	-61.906									0.684	-69.518
0.685	-61.906									0.685	-69.518
0.686	-61.906									0.686	-69.518
0.687	-61.906									0.687	-69.518
0.688	-61.905									0.688	-69.518
0.689	-61.905									0.689	-69.518
0.69	-61.905									0.69	-69.518
0.691	-61.905									0.691	-69.518
0.692	-61.905									0.692	-69.518
0.693	-61.905									0.693	-69.518
0.694	-61.905									0.694	-69.518
0.695	-61.905									0.695	-69.518
0.696	-61.905									0.696	-69.518
0.697	-61.905									0.697	-69.518
0.698	-61.905									0.698	-69.518
0.699	-61.905									0.699	-69.518
0.7	-61.905									0.7	-69.518
0.701	-61.905									0.701	-69.518
0.702	-61.904									0.702	-69.518
0.703	-61.904									0.703	-69.518
0.704	-61.904									0.704	-69.518
0.705	-61.904									0.705	-69.518
0.706	-61.904									0.706	-69.518
0.707	-61.904									0.707	-69.518
0.708	-61.904									0.708	-69.518
0.709	-61.904									0.709	-69.518
0.71	-61.904									0.71	-69.518
0.711	-61.904									0.711	-69.518
0.712	-61.904									0.712	-69.518
0.713	-61.904									0.713	-69.518
0.714	-61.904									0.714	-69.518
0.715	-61.904									0.715	-69.518
0.716	-61.903									0.716	-69.518
0.717	-61.903									0.717	-69.518
0.718	-61.903									0.718	-69.518
0.719	-61.903									0.719	-69.518
0.72	-61.903									0.72	-69.518
0.721	-61.903									0.721	-69.518
0.722	-61.903									0.722	-69.518
0.723	-61.903									0.723	-69.518
0.724	-61.903									0.724	-69.518
0.725	-61.903									0.725	-69.518
0.726	-61.903									0.726	-69.518
0.727	-61.903									0.727	-69.518
0.728	-61.903									0.728	-69.518
0.729	-61.903									0.729	-69.518
0.73	-61.902									0.73	-69.518
0.731	-61.902									0.731	-69.518
0.732	-61.902									0.732	-69.518
0.733	-61.902									0.733	-69.518
0.734	-61.902									0.734	-69.518
0.735	-61.902									0.735	-69.518
0.736	-61.902									0.736	-69.518
0.737	-61.902									0.737	-69.518
0.738	-61.902									0.738	-69.518
0.739	-61.902									0.739	-69.518
0.74	-61.902									0.74	-69.518
0.741	-61.902									0.741	-69.518
0.742	-61.902									0.742	-69.518
0.743	-61.902									0.743	-69.518
0.744	-61.901									0.744	-69.518
0.745	-61.901									0.745	-69.518
0.746	-61.901									0.746	-69.518
0.747	-61.901									0.747	-69.518
0.748	-61.901									0.748	-69.518
0.749	-61.901									0.749	-69.518
0.75	-61.901									0.75	-69.518
0.751	-61.901									0.751	-69.518
0.752	-61.901									0.752	-69.518
0.753	-61.901									0.753	-69.518
0.754	-61.901									0.754	-69.518
0.755	-61.901									0.755	-69.518
0.756	-61.901									0.756	-69.518
0.757	-61.901									0.757	-69.518
0.758	-61.901									0.758	-69.518
0.759	-61.9									0.759	-69.518
0.76	-61.9									0.76	-69.518
0.761	-61.9									0.761	-69.518
0.762	-61.9									0.762	-69.518
0.763	-61.9									0.763	-69.518
0.764	-61.9									0.764	-69.518
0.765	-61.9									0.765	-69.518
0.766	-61.9									0.766	-69.518
0.767	-61.9									0.767	-69.518
0.768	-61.9									0.768	-69.518
0.769	-61.9									0.769	-69.518
0.77	-61.9									0.77	-69.518
0.771	-61.9									0.771	-69.518
0.772	-61.9									0.772	-69.518
0.773	-61.9									0.773	-69.518
0.774	-61.9									0.774	-69.518
0.775	-61.899									0.775	-69.518
0.776	-61.899									0.776	-69.518
0.777	-61.899									0.777	-69.518
0.778	-61.899									0.778	-69.518
0.779	-61.899									0.779	-69.518
0.78	-61.899									0.78	-69.518
0.781	-61.899									0.781	-69.518
0.782	-61.899									0.782	-69.518
0.783	-61.899									0.783	-69.518
0.784	-61.899									0.784	-69.518
0.785	-61.899									0.785	-69.518
0.786	-61.899									0.786	-69.518
0.787	-61.899									0.787	-69.518
0.788	-61.899									0.788	-69.518
0.789	-61.899									0.789	-69.518
0.79	-61.898									0.79	-69.518
0.791	-61.898									0.791	-69.518
0.792	-61.898									0.792	-69.518
0.793	-61.898									0.793	-69.518
0.794	-61.898									0.794	-69.518
0.795	-61.898									0.795	-69.518
0.796	-61.898									0.796	-69.518
0.797	-61.898									0.797	-69.518
0.798	-61.898									0.798	-69.518
0.799	-61.898									0.799	-69.518
0.8	-61.898									0.8	-69.518
0.801	-61.898									0.801	-69.518
0.802	-61.898									0.802	-69.518
0.803	-61.898									0.803	-69.518
0.804	-61.898									0.804	-69.518
0.805	-61.898									0.805	-69.518
0.806	-61.897									0.806	-69.518
0.807	-61.897									0.807	-69.518
0.808	-61.897									0.808	-69.518
0.809	-61.897									0.809	-69.518
0.81	-61.897									0.81	-69.518
0.811	-61.897									0.811	-69.518
0.812	-61.897									0.812	-69.518
0.813	-61.897									0.813	-69.518
0.814	-61.897									0.814	-69.518
0.815	-61.897									0.815	-69.518
0.816	-61.897									0.816	-69.518
0.817	-61.897									0.817	-69.518
0.818	-61.897									0.818	-69.518
0.819	-61.897									0.819	-69.518
0.82	-61.897									0.82	-69.518
0.821	-61.897									0.821	-69.518
0.822	-61.897									0.822	-69.518
0.823	-61.896									0.823	-69.518
0.824	-61.896									0.824	-69.518
0.825	-61.896									0.825	-69.518
0.826	-61.896									0.826	-69.518
0.827	-61.896									0.827	-69.518
0.828	-61.896									0.828	-69.518
0.829	-61.896									0.829	-69.518
0.83	-61.896									0.83	-69.518
0.831	-61.896									0.831	-69.518
0.832	-61.896									0.832	-69.518
0.833	-61.896									0.833	-69.518
0.834	-61.896									0.834	-69.518
0.835	-61.896									0.835	-69.518
0.836	-61.896									0.836	-69.518
0.837	-61.896									0.837	-69.518
0.838	-61.896									0.838	-69.518
0.839	-61.896									0.839	-69.518
0.84	-61.895									0.84	-69.518
0.841	-61.895									0.841	-69.518
0.842	-61.895									0.842	-69.518
0.843	-61.895									0.843	-69.518
0.844	-61.895									0.844	-69.518
0.845	-61.895									0.845	-69.518
0.846	-61.895									0.846	-69.518
0.847	-61.895									0.847	-69.518
0.848	-61.895									0.848	-69.518
0.849	-61.895									0.849	-69.518
0.85	-61.895									0.85	-69.518
0.851	-61.895									0.851	-69.518
0.852	-61.895									0.852	-69.518
0.853	-61.895									0.853	-69.518
0.854	-61.895									0.854	-69.518
0.855	-61.895									0.855	-69.518
0.856	-61.895									0.856	-69.518
0.857	-61.894									0.857	-69.518
0.858	-61.894									0.858	-69.518
0.859	-61.894									0.859	-69.518
0.86	-61.894									0.86	-69.518
0.861	-61.894									0.861	-69.518
0.862	-61.894									0.862	-69.518
0.863	-61.894									0.863	-69.518
0.864	-61.894									0.864	-69.518
0.865	-61.894									0.865	-69.518
0.866	-61.894									0.866	-69.518
0.867	-61.894									0.867	-69.518
0.868	-61.894									0.868	-69.518
0.869	-61.894									0.869	-69.518
0.87	-61.894									0.87	-69.518
0.871	-61.894									0.871	-69.518
0.872	-61.894									0.872	-69.518
0.873	-61.894									0.873	-69.518
0.874	-61.894									0.874	-69.518
0.875	-61.893									0.875	-69.518
0.876	-61.893									0.876	-69.518
0.877	-61.893									0.877	-69.518
0.878	-61.893									0.878	-69.518
0.879	-61.893									0.879	-69.518
0.88	-61.893									0.88	-69.518
0.881	-61.893									0.881	-69.518
0.882	-61.893									0.882	-69.518
0.883	-61.893									0.883	-69.518
0.884	-61.893									0.884	-69.518
0.885	-61.893									0.885	-69.518
0.886	-61.893									0.886	-69.518
0.887	-61.893									0.887	-69.518
0.888	-61.893									0.888	-69.518
0.889	-61.893									0.889	-69.518
0.89	-61.893									0.89	-69.518
0.891	-61.893									0.891	-69.518
0.892	-61.893									0.892	-69.518
0.893	-61.892									0.893	-69.518
0.894	-61.892									0.894	-69.518
0.895	-61.892									0.895	-69.518
0.896	-61.892									0.896	-69.518
0.897	-61.892									0.897	-69.518
0.898	-61.892									0.898	-69.518
0.899	-61.892									0.899	-69.518
0.9	-61.892									0.9	-69.518
0.901	-61.892									0.901	-69.518
0.902	-61.892									0.902	-69.518
0.903	-61.892									0.903	-69.518
0.904	-61.892									0.904	-69.518
0.905	-61.892									0.905	-69.518
0.906	-61.892									0.906	-69.518
0.907	-61.892									0.907	-69.518
0.908	-61.892									0.908	-69.518
0.909	-61.892									0.909	-69.518
0.91	-61.892									0.91	-69.518
0.911	-61.892									0.911	-69.518
0.912	-61.891									0.912	-69.518
0.913	-61.891									0.913	-69.518
0.914	-61.891									0.914	-69.518
0.915	-61.891									0.915	-69.518
0.916	-61.891									0.916	-69.518
0.917	-61.891									0.917	-69.518
0.918	-61.891									0.918	-69.518
0.919	-61.891									0.919	-69.518
0.92	-61.891									0.92	-69.518
0.921	-61.891									0.921	-69.518
0.922	-61.891									0.922	-69.518
0.923	-61.891									0.923	-69.518
0.924	-61.891									0.924	-69.518
0.925	-61.891									0.925	-69.518
0.926	-61.891									0.926	-69.518
0.927	-61.891									0.927	-69.518
0.928	-61.891									0.928	-69.518
0.929	-61.891									0.929	-69.518
0.93	-61.891									0.93	-69.518
0.931	-61.891									0.931	-69.518
0.932	-61.89									0.932	-69.518
0.933	-61.89									0.933	-69.518
0.934	-61.89									0.934	-69.518
0.935	-61.89									0.935	-69.518
0.936	-61.89									0.936	-69.518
0.937	-61.89									0.937	-69.518
0.938	-61.89									0.938	-69.518
0.939	-61.89									0.939	-69.518
0.94	-61.89									0.94	-69.518
0.941	-61.89									0.941	-69.518
0.942	-61.89									0.942	-69.518
0.943	-61.89									0.943	-69.518
0.944	-61.89									0.944	-69.518
0.945	-61.89									0.945	-69.518
0.946	-61.89									0.946	-69.518
0.947	-61.89									0.947	-69.517
0.948	-61.89									0.948	-69.517
0.949	-61.89									0.949	-69.517
0.95	-61.89									0.95	-69.517
0.951	-61.89									0.951	-69.517
0.952	-61.889									0.952	-69.517
0.953	-61.889									0.953	-69.517
0.954	-61.889									0.954	-69.517
0.955	-61.889									0.955	-69.517
0.956	-61.889									0.956	-69.517
0.957	-61.889									0.957	-69.517
0.958	-61.889									0.958	-69.517
0.959	-61.889									0.959	-69.517
0.96	-61.889									0.96	-69.517
0.961	-61.889									0.961	-69.517
0.962	-61.889									0.962	-69.517
0.963	-61.889									0.963	-69.517
0.964	-61.889									0.964	-69.517
0.965	-61.889									0.965	-69.517
0.966	-61.889									0.966	-69.517
0.967	-61.889									0.967	-69.517
0.968	-61.889									0.968	-69.517
0.969	-61.889									0.969	-69.517
0.97	-61.889									0.97	-69.517
0.971	-61.889									0.971	-69.517
0.972	-61.888									0.972	-69.517
0.973	-61.888									0.973	-69.517
0.974	-61.888									0.974	-69.517
0.975	-61.888									0.975	-69.517
0.976	-61.888									0.976	-69.517
0.977	-61.888									0.977	-69.517
0.978	-61.888									0.978	-69.517
0.979	-61.888									0.979	-69.517
0.98	-61.888									0.98	-69.517
0.981	-61.888									0.981	-69.517
0.982	-61.888									0.982	-69.517
0.983	-61.888									0.983	-69.517
0.984	-61.888									0.984	-69.517
0.985	-61.888									0.985	-69.517
0.986	-61.888									0.986	-69.517
0.987	-61.888									0.987	-69.517
0.988	-61.888									0.988	-69.517
0.989	-61.888									0.989	-69.517
0.99	-61.888									0.99	-69.517
0.991	-61.888									0.991	-69.517
0.992	-61.888									0.992	-69.517
0.993	-61.888									0.993	-69.517
0.994	-61.887									0.994	-69.517
0.995	-61.887									0.995	-69.517
0.996	-61.887									0.996	-69.517
0.997	-61.887									0.997	-69.517
0.998	-61.887									0.998	-69.517
0.999	-61.887									0.999	-69.517
1	-61.887									1	-69.517
1.001	-61.887									1.001	-69.517
1.002	-61.887									1.002	-69.517
1.003	-61.887									1.003	-69.517
1.004	-61.887									1.004	-69.517
1.005	-61.887									1.005	-69.517
1.006	-61.887									1.006	-69.517
1.007	-61.887									1.007	-69.517
1.008	-61.887									1.008	-69.517
1.009	-61.887									1.009	-69.517
1.01	-61.887									1.01	-69.517
1.011	-61.887									1.011	-69.517
1.012	-61.887									1.012	-69.517
1.013	-61.887									1.013	-69.517
1.014	-61.887									1.014	-69.517
1.015	-61.887									1.015	-69.517
1.016	-61.886									1.016	-69.517
1.017	-61.886									1.017	-69.517
1.018	-61.886									1.018	-69.517
1.019	-61.886									1.019	-69.517
1.02	-61.886									1.02	-69.517
1.021	-61.886									1.021	-69.517
1.022	-61.886									1.022	-69.517
1.023	-61.886									1.023	-69.517
1.024	-61.886									1.024	-69.517
1.025	-61.886									1.025	-69.517
1.026	-61.886									1.026	-69.517
1.027	-61.886									1.027	-69.517
1.028	-61.886									1.028	-69.517
1.029	-61.886									1.029	-69.517
1.03	-61.886									1.03	-69.517
1.031	-61.886									1.031	-69.517
1.032	-61.886									1.032	-69.517
1.033	-61.886									1.033	-69.517
1.034	-61.886									1.034	-69.517
1.035	-61.886									1.035	-69.517
1.036	-61.886									1.036	-69.517
1.037	-61.886									1.037	-69.517
1.038	-61.886									1.038	-69.517
1.039	-61.885									1.039	-69.517
1.04	-61.885									1.04	-69.517
1.041	-61.885									1.041	-69.517
1.042	-61.885									1.042	-69.517
1.043	-61.885									1.043	-69.517
1.044	-61.885									1.044	-69.517
1.045	-61.885									1.045	-69.517
1.046	-61.885									1.046	-69.517
1.047	-61.885									1.047	-69.517
1.048	-61.885									1.048	-69.517
1.049	-61.885									1.049	-69.517
1.05	-61.885									1.05	-69.517
1.051	-61.885									1.051	-69.517
1.052	-61.885									1.052	-69.517
1.053	-61.885									1.053	-69.517
1.054	-61.885									1.054	-69.517
1.055	-61.885									1.055	-69.517
1.056	-61.885									1.056	-69.517
1.057	-61.885									1.057	-69.517
1.058	-61.885									1.058	-69.517
1.059	-61.885									1.059	-69.517
1.06	-61.885									1.06	-69.517
1.061	-61.885									1.061	-69.517
1.062	-61.884									1.062	-69.517
1.063	-61.884									1.063	-69.517
1.064	-61.884									1.064	-69.517
1.065	-61.884									1.065	-69.517
1.066	-61.884									1.066	-69.517
1.067	-61.884									1.067	-69.517
1.068	-61.884									1.068	-69.517
1.069	-61.884									1.069	-69.517
1.07	-61.884									1.07	-69.517
1.071	-61.884									1.071	-69.517
1.072	-61.884									1.072	-69.517
1.073	-61.884									1.073	-69.517
1.074	-61.884									1.074	-69.517
1.075	-61.884									1.075	-69.517
1.076	-61.884									1.076	-69.517
1.077	-61.884									1.077	-69.517
1.078	-61.884									1.078	-69.517
1.079	-61.884									1.079	-69.517
1.08	-61.884									1.08	-69.517
1.081	-61.884									1.081	-69.517
1.082	-61.884									1.082	-69.517
1.083	-61.884									1.083	-69.517
1.084	-61.884									1.084	-69.517
1.085	-61.884									1.085	-69.517
1.086	-61.884									1.086	-69.517
1.087	-61.883									1.087	-69.517
1.088	-61.883									1.088	-69.517
1.089	-61.883									1.089	-69.517
1.09	-61.883									1.09	-69.517
1.091	-61.883									1.091	-69.517
1.092	-61.883									1.092	-69.517
1.093	-61.883									1.093	-69.517
1.094	-61.883									1.094	-69.517
1.095	-61.883									1.095	-69.517
1.096	-61.883									1.096	-69.517
1.097	-61.883									1.097	-69.517
1.098	-61.883									1.098	-69.517
1.099	-61.883									1.099	-69.517
1.1	-61.883									1.1	-69.517
1.101	-61.883									1.101	-69.517
1.102	-61.883									1.102	-69.517
1.103	-61.883									1.103	-69.517
1.104	-61.883									1.104	-69.517
1.105	-61.883									1.105	-69.517
1.106	-61.883									1.106	-69.517
1.107	-61.883									1.107	-69.517
1.108	-61.883									1.108	-69.517
1.109	-61.883									1.109	-69.517
1.11	-61.883									1.11	-69.517
1.111	-61.883									1.111	-69.517
1.112	-61.882									1.112	-69.517
1.113	-61.882									1.113	-69.517
1.114	-61.882									1.114	-69.517
1.115	-61.882									1.115	-69.517
1.116	-61.882									1.116	-69.517
1.117	-61.882									1.117	-69.517
1.118	-61.882									1.118	-69.517
1.119	-61.882									1.119	-69.517
1.12	-61.882									1.12	-69.517
1.121	-61.882									1.121	-69.517
1.122	-61.882									1.122	-69.517
1.123	-61.882									1.123	-69.517
1.124	-61.882									1.124	-69.517
1.125	-61.882									1.125	-69.517
1.126	-61.882									1.126	-69.517
1.127	-61.882									1.127	-69.517
1.128	-61.882									1.128	-69.517
1.129	-61.882									1.129	-69.517
1.13	-61.882									1.13	-69.517
1.131	-61.882									1.131	-69.517
1.132	-61.882									1.132	-69.517
1.133	-61.882									1.133	-69.517
1.134	-61.882									1.134	-69.517
1.135	-61.882									1.135	-69.517
1.136	-61.882									1.136	-69.517
1.137	-61.882									1.137	-69.517
1.138	-61.881									1.138	-69.517
1.139	-61.881									1.139	-69.517
1.14	-61.881									1.14	-69.517
1.141	-61.881									1.141	-69.517
1.142	-61.881									1.142	-69.517
1.143	-61.881									1.143	-69.517
1.144	-61.881									1.144	-69.517
1.145	-61.881									1.145	-69.517
1.146	-61.881									1.146	-69.517
1.147	-61.881									1.147	-69.517
1.148	-61.881									1.148	-69.517
1.149	-61.881									1.149	-69.517
1.15	-61.881									1.15	-69.517
1.151	-61.881									1.151	-69.517
1.152	-61.881									1.152	-69.517
1.153	-61.881									1.153	-69.517
1.154	-61.881									1.154	-69.517
1.155	-61.881									1.155	-69.517
1.156	-61.881									1.156	-69.517
1.157	-61.881									1.157	-69.517
1.158	-61.881									1.158	-69.517
1.159	-61.881									1.159	-69.517
1.16	-61.881									1.16	-69.517
1.161	-61.881									1.161	-69.517
1.162	-61.881									1.162	-69.517
1.163	-61.881									1.163	-69.517
1.164	-61.881									1.164	-69.517
1.165	-61.881									1.165	-69.517
1.166	-61.88									1.166	-69.517
1.167	-61.88									1.167	-69.517
1.168	-61.88									1.168	-69.517
1.169	-61.88									1.169	-69.517
1.17	-61.88									1.17	-69.517
1.171	-61.88									1.171	-69.517
1.172	-61.88									1.172	-69.517
1.173	-61.88									1.173	-69.517
1.174	-61.88									1.174	-69.517
1.175	-61.88									1.175	-69.517
1.176	-61.88									1.176	-69.517
1.177	-61.88									1.177	-69.517
1.178	-61.88									1.178	-69.517
1.179	-61.88									1.179	-69.517
1.18	-61.88									1.18	-69.517
1.181	-61.88									1.181	-69.517
1.182	-61.88									1.182	-69.517
1.183	-61.88									1.183	-69.517
1.184	-61.88									1.184	-69.517
1.185	-61.88									1.185	-69.517
1.186	-61.88									1.186	-69.517
1.187	-61.88									1.187	-69.517
1.188	-61.88									1.188	-69.517
1.189	-61.88									1.189	-69.517
1.19	-61.88									1.19	-69.517
1.191	-61.88									1.191	-69.517
1.192	-61.88									1.192	-69.517
1.193	-61.88									1.193	-69.517
1.194	-61.879									1.194	-69.517
1.195	-61.879									1.195	-69.517
1.196	-61.879									1.196	-69.517
1.197	-61.879									1.197	-69.517
1.198	-61.879									1.198	-69.517
1.199	-61.879									1.199	-69.517
1.2	-61.879									1.2	-69.517
1.201	-61.879									1.201	-69.517
1.202	-61.879									1.202	-69.517
1.203	-61.879									1.203	-69.517
1.204	-61.879									1.204	-69.517
1.205	-61.879									1.205	-69.517
1.206	-61.879									1.206	-69.517
1.207	-61.879									1.207	-69.517
1.208	-61.879									1.208	-69.517
1.209	-61.879									1.209	-69.517
1.21	-61.879									1.21	-69.517
1.211	-61.879									1.211	-69.517
1.212	-61.879									1.212	-69.517
1.213	-61.879									1.213	-69.517
1.214	-61.879									1.214	-69.517
1.215	-61.879									1.215	-69.517
1.216	-61.879									1.216	-69.517
1.217	-61.879									1.217	-69.517
1.218	-61.879									1.218	-69.517
1.219	-61.879									1.219	-69.517
1.22	-61.879									1.22	-69.517
1.221	-61.879									1.221	-69.517
1.222	-61.879									1.222	-69.517
1.223	-61.879									1.223	-69.517
1.224	-61.878									1.224	-69.517
1.225	-61.878									1.225	-69.517
1.226	-61.878									1.226	-69.517
1.227	-61.878									1.227	-69.517
1.228	-61.878									1.228	-69.517
1.229	-61.878									1.229	-69.517
1.23	-61.878									1.23	-69.517
1.231	-61.878									1.231	-69.517
1.232	-61.878									1.232	-69.517
1.233	-61.878									1.233	-69.517
1.234	-61.878									1.234	-69.517
1.235	-61.878									1.235	-69.517
1.236	-61.878									1.236	-69.517
1.237	-61.878									1.237	-69.517
1.238	-61.878									1.238	-69.517
1.239	-61.878									1.239	-69.517
1.24	-61.878									1.24	-69.517
1.241	-61.878									1.241	-69.517
1.242	-61.878									1.242	-69.517
1.243	-61.878									1.243	-69.517
1.244	-61.878									1.244	-69.517
1.245	-61.878									1.245	-69.517
1.246	-61.878									1.246	-69.517
1.247	-61.878									1.247	-69.517
1.248	-61.878									1.248	-69.517
1.249	-61.878									1.249	-69.517
1.25	-61.878									1.25	-69.517
1.251	-61.878									1.251	-69.517
1.252	-61.878									1.252	-69.517
1.253	-61.878									1.253	-69.517
1.254	-61.877									1.254	-69.517
1.255	-61.877									1.255	-69.517
1.256	-61.877									1.256	-69.517
1.257	-61.877									1.257	-69.517
1.258	-61.877									1.258	-69.517
1.259	-61.877									1.259	-69.517
1.26	-61.877									1.26	-69.517
1.261	-61.877									1.261	-69.517
1.262	-61.877									1.262	-69.517
1.263	-61.877									1.263	-69.517
1.264	-61.877									1.264	-69.517
1.265	-61.877									1.265	-69.517
1.266	-61.877									1.266	-69.517
1.267	-61.877									1.267	-69.517
1.268	-61.877									1.268	-69.517
1.269	-61.877									1.269	-69.517
1.27	-61.877									1.27	-69.517
1.271	-61.877									1.271	-69.517
1.272	-61.877									1.272	-69.517
1.273	-61.877									1.273	-69.517
1.274	-61.877									1.274	-69.517
1.275	-61.877									1.275	-69.517
1.276	-61.877									1.276	-69.517
1.277	-61.877									1.277	-69.517
1.278	-61.877									1.278	-69.517
1.279	-61.877									1.279	-69.517
1.28	-61.877									1.28	-69.517
1.281	-61.877									1.281	-69.517
1.282	-61.877									1.282	-69.517
1.283	-61.877									1.283	-69.517
1.284	-61.877									1.284	-69.517
1.285	-61.877									1.285	-69.517
1.286	-61.876									1.286	-69.517
1.287	-61.876									1.287	-69.517
1.288	-61.876									1.288	-69.517
1.289	-61.876									1.289	-69.517
1.29	-61.876									1.29	-69.517
1.291	-61.876									1.291	-69.517
1.292	-61.876									1.292	-69.517
1.293	-61.876									1.293	-69.517
1.294	-61.876									1.294	-69.517
1.295	-61.876									1.295	-69.517
1.296	-61.876									1.296	-69.517
1.297	-61.876									1.297	-69.517
1.298	-61.876									1.298	-69.517
1.299	-61.876									1.299	-69.517
1.3	-61.876									1.3	-69.517
1.301	-61.876									1.301	-69.517
1.302	-61.876									1.302	-69.517
1.303	-61.876									1.303	-69.517
1.304	-61.876									1.304	-69.517
1.305	-61.876									1.305	-69.517
1.306	-61.876									1.306	-69.517
1.307	-61.876									1.307	-69.517
1.308	-61.876									1.308	-69.517
1.309	-61.876									1.309	-69.517
1.31	-61.876									1.31	-69.517
1.311	-61.876									1.311	-69.517
1.312	-61.876									1.312	-69.517
1.313	-61.876									1.313	-69.517
1.314	-61.876									1.314	-69.517
1.315	-61.876									1.315	-69.517
1.316	-61.876									1.316	-69.517
1.317	-61.876									1.317	-69.517
1.318	-61.876									1.318	-69.517
1.319	-61.876									1.319	-69.517
1.32	-61.875									1.32	-69.517
1.321	-61.875									1.321	-69.517
1.322	-61.875									1.322	-69.517
1.323	-61.875									1.323	-69.517
1.324	-61.875									1.324	-69.517
1.325	-61.875									1.325	-69.517
1.326	-61.875									1.326	-69.517
1.327	-61.875									1.327	-69.517
1.328	-61.875									1.328	-69.517
1.329	-61.875									1.329	-69.517
1.33	-61.875									1.33	-69.517
1.331	-61.875									1.331	-69.517
1.332	-61.875									1.332	-69.517
1.333	-61.875									1.333	-69.517
1.334	-61.875									1.334	-69.517
1.335	-61.875									1.335	-69.517
1.336	-61.875									1.336	-69.517
1.337	-61.875									1.337	-69.517
1.338	-61.875									1.338	-69.517
1.339	-61.875									1.339	-69.517
1.34	-61.875									1.34	-69.517
1.341	-61.875									1.341	-69.517
1.342	-61.875									1.342	-69.517
1.343	-61.875									1.343	-69.517
1.344	-61.875									1.344	-69.517
1.345	-61.875									1.345	-69.517
1.346	-61.875									1.346	-69.517
1.347	-61.875									1.347	-69.517
1.348	-61.875									1.348	-69.517
1.349	-61.875									1.349	-69.517
1.35	-61.875									1.35	-69.517
1.351	-61.875									1.351	-69.517
1.352	-61.875									1.352	-69.517
1.353	-61.875									1.353	-69.517
1.354	-61.875									1.354	-69.517
1.355	-61.874									1.355	-69.517
1.356	-61.874									1.356	-69.517
1.357	-61.874									1.357	-69.517
1.358	-61.874									1.358	-69.517
1.359	-61.874									1.359	-69.517
1.36	-61.874									1.36	-69.517
1.361	-61.874									1.361	-69.517
1.362	-61.874									1.362	-69.517
1.363	-61.874									1.363	-69.517
1.364	-61.874									1.364	-69.517
1.365	-61.874									1.365	-69.517
1.366	-61.874									1.366	-69.517
1.367	-61.874									1.367	-69.517
1.368	-61.874									1.368	-69.517
1.369	-61.874									1.369	-69.517
1.37	-61.874									1.37	-69.517
1.371	-61.874									1.371	-69.517
1.372	-61.874									1.372	-69.517
1.373	-61.874									1.373	-69.517
1.374	-61.874									1.374	-69.517
1.375	-61.874									1.375	-69.517
1.376	-61.874									1.376	-69.517
1.377	-61.874									1.377	-69.517
1.378	-61.874									1.378	-69.517
1.379	-61.874									1.379	-69.517
1.38	-61.874									1.38	-69.517
1.381	-61.874									1.381	-69.517
1.382	-61.874									1.382	-69.517
1.383	-61.874									1.383	-69.517
1.384	-61.874									1.384	-69.517
1.385	-61.874									1.385	-69.517
1.386	-61.874									1.386	-69.517
1.387	-61.874									1.387	-69.517
1.388	-61.874									1.388	-69.517
1.389	-61.874									1.389	-69.517
1.39	-61.874									1.39	-69.517
1.391	-61.873									1.391	-69.517
1.392	-61.873									1.392	-69.517
1.393	-61.873									1.393	-69.517
1.394	-61.873									1.394	-69.517
1.395	-61.873									1.395	-69.517
1.396	-61.873									1.396	-69.517
1.397	-61.873									1.397	-69.517
1.398	-61.873									1.398	-69.517
1.399	-61.873									1.399	-69.517
1.4	-61.873									1.4	-69.517
1.401	-61.873									1.401	-69.517
1.402	-61.873									1.402	-69.517
1.403	-61.873									1.403	-69.517
1.404	-61.873									1.404	-69.517
1.405	-61.873									1.405	-69.517
1.406	-61.873									1.406	-69.517
1.407	-61.873									1.407	-69.517
1.408	-61.873									1.408	-69.517
1.409	-61.873									1.409	-69.517
1.41	-61.873									1.41	-69.517
1.411	-61.873									1.411	-69.517
1.412	-61.873									1.412	-69.517
1.413	-61.873									1.413	-69.517
1.414	-61.873									1.414	-69.517
1.415	-61.873									1.415	-69.517
1.416	-61.873									1.416	-69.517
1.417	-61.873									1.417	-69.517
1.418	-61.873									1.418	-69.517
1.419	-61.873									1.419	-69.517
1.42	-61.873									1.42	-69.517
1.421	-61.873									1.421	-69.517
1.422	-61.873									1.422	-69.517
1.423	-61.873									1.423	-69.517
1.424	-61.873									1.424	-69.517
1.425	-61.873									1.425	-69.517
1.426	-61.873									1.426	-69.517
1.427	-61.873									1.427	-69.517
1.428	-61.873									1.428	-69.517
1.429	-61.873									1.429	-69.517
1.43	-61.872									1.43	-69.517
1.431	-61.872									1.431	-69.517
1.432	-61.872									1.432	-69.517
1.433	-61.872									1.433	-69.517
1.434	-61.872									1.434	-69.517
1.435	-61.872									1.435	-69.517
1.436	-61.872									1.436	-69.517
1.437	-61.872									1.437	-69.517
1.438	-61.872									1.438	-69.517
1.439	-61.872									1.439	-69.517
1.44	-61.872									1.44	-69.517
1.441	-61.872									1.441	-69.517
1.442	-61.872									1.442	-69.517
1.443	-61.872									1.443	-69.517
1.444	-61.872									1.444	-69.517
1.445	-61.872									1.445	-69.517
1.446	-61.872									1.446	-69.517
1.447	-61.872									1.447	-69.517
1.448	-61.872									1.448	-69.517
1.449	-61.872									1.449	-69.517
1.45	-61.872									1.45	-69.517
1.451	-61.872									1.451	-69.517
1.452	-61.872									1.452	-69.517
1.453	-61.872									1.453	-69.517
1.454	-61.872									1.454	-69.517
1.455	-61.872									1.455	-69.517
1.456	-61.872									1.456	-69.517
1.457	-61.872									1.457	-69.517
1.458	-61.872									1.458	-69.517
1.459	-61.872									1.459	-69.517
1.46	-61.872									1.46	-69.517
1.461	-61.872									1.461	-69.517
1.462	-61.872									1.462	-69.517
1.463	-61.872									1.463	-69.517
1.464	-61.872									1.464	-69.517
1.465	-61.872									1.465	-69.517
1.466	-61.872									1.466	-69.517
1.467	-61.872									1.467	-69.517
1.468	-61.872									1.468	-69.517
1.469	-61.872									1.469	-69.517
1.47	-61.871									1.47	-69.517
1.471	-61.871									1.471	-69.517
1.472	-61.871									1.472	-69.517
1.473	-61.871									1.473	-69.517
1.474	-61.871									1.474	-69.517
1.475	-61.871									1.475	-69.517
1.476	-61.871									1.476	-69.517
1.477	-61.871									1.477	-69.517
1.478	-61.871									1.478	-69.517
1.479	-61.871									1.479	-69.517
1.48	-61.871									1.48	-69.517
1.481	-61.871									1.481	-69.517
1.482	-61.871									1.482	-69.517
1.483	-61.871									1.483	-69.517
1.484	-61.871									1.484	-69.517
1.485	-61.871									1.485	-69.517
1.486	-61.871									1.486	-69.517
1.487	-61.871									1.487	-69.517
1.488	-61.871									1.488	-69.517
1.489	-61.871									1.489	-69.517
1.49	-61.871									1.49	-69.517
1.491	-61.871									1.491	-69.517
1.492	-61.871									1.492	-69.517
1.493	-61.871									1.493	-69.517
1.494	-61.871									1.494	-69.517
1.495	-61.871									1.495	-69.517
1.496	-61.871									1.496	-69.517
1.497	-61.871									1.497	-69.517
1.498	-61.871									1.498	-69.517
1.499	-61.871									1.499	-69.517
1.5	-61.871									1.5	-69.517
1.501	-61.871									1.501	-69.517
1.502	-61.871									1.502	-69.517
1.503	-61.871									1.503	-69.517
1.504	-61.871									1.504	-69.517
1.505	-61.871									1.505	-69.517
1.506	-61.871									1.506	-69.517
1.507	-61.871									1.507	-69.517
1.508	-61.871									1.508	-69.517
1.509	-61.871									1.509	-69.517
1.51	-61.871									1.51	-69.517
1.511	-61.871									1.511	-69.517
1.512	-61.87									1.512	-69.517
1.513	-61.87									1.513	-69.517
1.514	-61.87									1.514	-69.517
1.515	-61.87									1.515	-69.517
1.516	-61.87									1.516	-69.517
1.517	-61.87									1.517	-69.517
1.518	-61.87									1.518	-69.517
1.519	-61.87									1.519	-69.517
1.52	-61.87									1.52	-69.517
1.521	-61.87									1.521	-69.517
1.522	-61.87									1.522	-69.517
1.523	-61.87									1.523	-69.517
1.524	-61.87									1.524	-69.517
1.525	-61.87									1.525	-69.517
1.526	-61.87									1.526	-69.517
1.527	-61.87									1.527	-69.517
1.528	-61.87									1.528	-69.517
1.529	-61.87									1.529	-69.517
1.53	-61.87									1.53	-69.517
1.531	-61.87									1.531	-69.517
1.532	-61.87									1.532	-69.517
1.533	-61.87									1.533	-69.517
1.534	-61.87									1.534	-69.517
1.535	-61.87									1.535	-69.517
1.536	-61.87									1.536	-69.517
1.537	-61.87									1.537	-69.517
1.538	-61.87									1.538	-69.517
1.539	-61.87									1.539	-69.517
1.54	-61.87									1.54	-69.517
1.541	-61.87									1.541	-69.517
1.542	-61.87									1.542	-69.517
1.543	-61.87									1.543	-69.517
1.544	-61.87									1.544	-69.517
1.545	-61.87									1.545	-69.517
1.546	-61.87									1.546	-69.517
1.547	-61.87									1.547	-69.517
1.548	-61.87									1.548	-69.517
1.549	-61.87									1.549	-69.517
1.55	-61.87									1.55	-69.517
1.551	-61.87									1.551	-69.517
1.552	-61.87									1.552	-69.517
1.553	-61.87									1.553	-69.517
1.554	-61.87									1.554	-69.517
1.555	-61.87									1.555	-69.517
1.556	-61.869									1.556	-69.517
1.557	-61.869									1.557	-69.517
1.558	-61.869									1.558	-69.517
1.559	-61.869									1.559	-69.517
1.56	-61.869									1.56	-69.517
1.561	-61.869									1.561	-69.517
1.562	-61.869									1.562	-69.517
1.563	-61.869									1.563	-69.517
1.564	-61.869									1.564	-69.517
1.565	-61.869									1.565	-69.517
1.566	-61.869									1.566	-69.517
1.567	-61.869									1.567	-69.517
1.568	-61.869									1.568	-69.517
1.569	-61.869									1.569	-69.517
1.57	-61.869									1.57	-69.517
1.571	-61.869									1.571	-69.517
1.572	-61.869									1.572	-69.517
1.573	-61.869									1.573	-69.517
1.574	-61.869									1.574	-69.517
1.575	-61.869									1.575	-69.517
1.576	-61.869									1.576	-69.517
1.577	-61.869									1.577	-69.517
1.578	-61.869									1.578	-69.517
1.579	-61.869									1.579	-69.517
1.58	-61.869									1.58	-69.517
1.581	-61.869									1.581	-69.517
1.582	-61.869									1.582	-69.517
1.583	-61.869									1.583	-69.517
1.584	-61.869									1.584	-69.517
1.585	-61.869									1.585	-69.517
1.586	-61.869									1.586	-69.517
1.587	-61.869									1.587	-69.517
1.588	-61.869									1.588	-69.517
1.589	-61.869									1.589	-69.517
1.59	-61.869									1.59	-69.517
1.591	-61.869									1.591	-69.517
1.592	-61.869									1.592	-69.517
1.593	-61.869									1.593	-69.517
1.594	-61.869									1.594	-69.517
1.595	-61.869									1.595	-69.517
1.596	-61.869									1.596	-69.517
1.597	-61.869									1.597	-69.517
1.598	-61.869									1.598	-69.517
1.599	-61.869									1.599	-69.517
1.6	-61.869									1.6	-69.517
1.601	-61.869									1.601	-69.517
1.602	-61.869									1.602	-69.517
1.603	-61.868									1.603	-69.517
1.604	-61.868									1.604	-69.517
1.605	-61.868									1.605	-69.517
1.606	-61.868									1.606	-69.517
1.607	-61.868									1.607	-69.517
1.608	-61.868									1.608	-69.517
1.609	-61.868									1.609	-69.517
1.61	-61.868									1.61	-69.517
1.611	-61.868									1.611	-69.517
1.612	-61.868									1.612	-69.517
1.613	-61.868									1.613	-69.517
1.614	-61.868									1.614	-69.517
1.615	-61.868									1.615	-69.517
1.616	-61.868									1.616	-69.517
1.617	-61.868									1.617	-69.517
1.618	-61.868									1.618	-69.517
1.619	-61.868									1.619	-69.517
1.62	-61.868									1.62	-69.517
1.621	-61.868									1.621	-69.517
1.622	-61.868									1.622	-69.517
1.623	-61.868									1.623	-69.517
1.624	-61.868									1.624	-69.517
1.625	-61.868									1.625	-69.517
1.626	-61.868									1.626	-69.517
1.627	-61.868									1.627	-69.517
1.628	-61.868									1.628	-69.517
1.629	-61.868									1.629	-69.517
1.63	-61.868									1.63	-69.517
1.631	-61.868									1.631	-69.517
1.632	-61.868									1.632	-69.517
1.633	-61.868									1.633	-69.517
1.634	-61.868									1.634	-69.517
1.635	-61.868									1.635	-69.517
1.636	-61.868									1.636	-69.517
1.637	-61.868									1.637	-69.517
1.638	-61.868									1.638	-69.517
1.639	-61.868									1.639	-69.517
1.64	-61.868									1.64	-69.517
1.641	-61.868									1.641	-69.517
1.642	-61.868									1.642	-69.517
1.643	-61.868									1.643	-69.517
1.644	-61.868									1.644	-69.517
1.645	-61.868									1.645	-69.517
1.646	-61.868									1.646	-69.517
1.647	-61.868									1.647	-69.517
1.648	-61.868									1.648	-69.517
1.649	-61.868									1.649	-69.517
1.65	-61.868									1.65	-69.517
1.651	-61.868									1.651	-69.517
1.652	-61.868									1.652	-69.517
1.653	-61.867									1.653	-69.517
1.654	-61.867									1.654	-69.517
1.655	-61.867									1.655	-69.517
1.656	-61.867									1.656	-69.517
1.657	-61.867									1.657	-69.517
1.658	-61.867									1.658	-69.517
1.659	-61.867									1.659	-69.517
1.66	-61.867									1.66	-69.517
1.661	-61.867									1.661	-69.517
1.662	-61.867									1.662	-69.517
1.663	-61.867									1.663	-69.517
1.664	-61.867									1.664	-69.517
1.665	-61.867									1.665	-69.517
1.666	-61.867									1.666	-69.517
1.667	-61.867									1.667	-69.517
1.668	-61.867									1.668	-69.517
1.669	-61.867									1.669	-69.517
1.67	-61.867									1.67	-69.517
1.671	-61.867									1.671	-69.517
1.672	-61.867									1.672	-69.517
1.673	-61.867									1.673	-69.517
1.674	-61.867									1.674	-69.517
1.675	-61.867									1.675	-69.517
1.676	-61.867									1.676	-69.517
1.677	-61.867									1.677	-69.517
1.678	-61.867									1.678	-69.517
1.679	-61.867									1.679	-69.517
1.68	-61.867									1.68	-69.517
1.681	-61.867									1.681	-69.517
1.682	-61.867									1.682	-69.517
1.683	-61.867									1.683	-69.517
1.684	-61.867									1.684	-69.517
1.685	-61.867									1.685	-69.517
1.686	-61.867									1.686	-69.517
1.687	-61.867									1.687	-69.517
1.688	-61.867									1.688	-69.517
1.689	-61.867									1.689	-69.517
1.69	-61.867									1.69	-69.517
1.691	-61.867									1.691	-69.517
1.692	-61.867									1.692	-69.517
1.693	-61.867									1.693	-69.517
1.694	-61.867									1.694	-69.517
1.695	-61.867									1.695	-69.517
1.696	-61.867									1.696	-69.517
1.697	-61.867									1.697	-69.517
1.698	-61.867									1.698	-69.517
1.699	-61.867									1.699	-69.517
1.7	-61.867									1.7	-69.517
1.701	-61.867									1.701	-69.517
1.702	-61.867									1.702	-69.517
1.703	-61.867									1.703	-69.517
1.704	-61.867									1.704	-69.517
1.705	-61.866									1.705	-69.517
1.706	-61.866									1.706	-69.517
1.707	-61.866									1.707	-69.517
1.708	-61.866									1.708	-69.517
1.709	-61.866									1.709	-69.517
1.71	-61.866									1.71	-69.517
1.711	-61.866									1.711	-69.517
1.712	-61.866									1.712	-69.517
1.713	-61.866									1.713	-69.517
1.714	-61.866									1.714	-69.517
1.715	-61.866									1.715	-69.517
1.716	-61.866									1.716	-69.517
1.717	-61.866									1.717	-69.517
1.718	-61.866									1.718	-69.517
1.719	-61.866									1.719	-69.517
1.72	-61.866									1.72	-69.517
1.721	-61.866									1.721	-69.517
1.722	-61.866									1.722	-69.517
1.723	-61.866									1.723	-69.517
1.724	-61.866									1.724	-69.517
1.725	-61.866									1.725	-69.517
1.726	-61.866									1.726	-69.517
1.727	-61.866									1.727	-69.517
1.728	-61.866									1.728	-69.517
1.729	-61.866									1.729	-69.517
1.73	-61.866									1.73	-69.517
1.731	-61.866									1.731	-69.517
1.732	-61.866									1.732	-69.517
1.733	-61.866									1.733	-69.517
1.734	-61.866									1.734	-69.517
1.735	-61.866									1.735	-69.517
1.736	-61.866									1.736	-69.517
1.737	-61.866									1.737	-69.517
1.738	-61.866									1.738	-69.517
1.739	-61.866									1.739	-69.517
1.74	-61.866									1.74	-69.517
1.741	-61.866									1.741	-69.517
1.742	-61.866									1.742	-69.517
1.743	-61.866									1.743	-69.517
1.744	-61.866									1.744	-69.517
1.745	-61.866									1.745	-69.517
1.746	-61.866									1.746	-69.517
1.747	-61.866									1.747	-69.517
1.748	-61.866									1.748	-69.517
1.749	-61.866									1.749	-69.517
1.75	-61.866									1.75	-69.517
1.751	-61.866									1.751	-69.517
1.752	-61.866									1.752	-69.517
1.753	-61.866									1.753	-69.517
1.754	-61.866									1.754	-69.517
1.755	-61.866									1.755	-69.517
1.756	-61.866									1.756	-69.517
1.757	-61.866									1.757	-69.517
1.758	-61.866									1.758	-69.517
1.759	-61.866									1.759	-69.517
1.76	-61.866									1.76	-69.517
1.761	-61.865									1.761	-69.517
1.762	-61.865									1.762	-69.517
1.763	-61.865									1.763	-69.517
1.764	-61.865									1.764	-69.517
1.765	-61.865									1.765	-69.517
1.766	-61.865									1.766	-69.517
1.767	-61.865									1.767	-69.517
1.768	-61.865									1.768	-69.517
1.769	-61.865									1.769	-69.517
1.77	-61.865									1.77	-69.517
1.771	-61.865									1.771	-69.517
1.772	-61.865									1.772	-69.517
1.773	-61.865									1.773	-69.517
1.774	-61.865									1.774	-69.517
1.775	-61.865									1.775	-69.517
1.776	-61.865									1.776	-69.517
1.777	-61.865									1.777	-69.517
1.778	-61.865									1.778	-69.517
1.779	-61.865									1.779	-69.517
1.78	-61.865									1.78	-69.517
1.781	-61.865									1.781	-69.517
1.782	-61.865									1.782	-69.517
1.783	-61.865									1.783	-69.517
1.784	-61.865									1.784	-69.517
1.785	-61.865									1.785	-69.517
1.786	-61.865									1.786	-69.517
1.787	-61.865									1.787	-69.517
1.788	-61.865									1.788	-69.517
1.789	-61.865									1.789	-69.517
1.79	-61.865									1.79	-69.517
1.791	-61.865									1.791	-69.517
1.792	-61.865									1.792	-69.517
1.793	-61.865									1.793	-69.517
1.794	-61.865									1.794	-69.517
1.795	-61.865									1.795	-69.517
1.796	-61.865									1.796	-69.517
1.797	-61.865									1.797	-69.517
1.798	-61.865									1.798	-69.517
1.799	-61.865									1.799	-69.517
1.8	-61.865									1.8	-69.517
1.801	-61.865									1.801	-69.517
1.802	-61.865									1.802	-69.517
1.803	-61.865									1.803	-69.517
1.804	-61.865									1.804	-69.517
1.805	-61.865									1.805	-69.517
1.806	-61.865									1.806	-69.517
1.807	-61.865									1.807	-69.517
1.808	-61.865									1.808	-69.517
1.809	-61.865									1.809	-69.517
1.81	-61.865									1.81	-69.517
1.811	-61.865									1.811	-69.517
1.812	-61.865									1.812	-69.517
1.813	-61.865									1.813	-69.517
1.814	-61.865									1.814	-69.517
1.815	-61.865									1.815	-69.517
1.816	-61.865									1.816	-69.517
1.817	-61.865									1.817	-69.517
1.818	-61.865									1.818	-69.517
1.819	-61.864									1.819	-69.517
1.82	-61.864									1.82	-69.517
1.821	-61.864									1.821	-69.517
1.822	-61.864									1.822	-69.517
1.823	-61.864									1.823	-69.517
1.824	-61.864									1.824	-69.517
1.825	-61.864									1.825	-69.517
1.826	-61.864									1.826	-69.517
1.827	-61.864									1.827	-69.517
1.828	-61.864									1.828	-69.517
1.829	-61.864									1.829	-69.517
1.83	-61.864									1.83	-69.517
1.831	-61.864									1.831	-69.517
1.832	-61.864									1.832	-69.517
1.833	-61.864									1.833	-69.517
1.834	-61.864									1.834	-69.517
1.835	-61.864									1.835	-69.517
1.836	-61.864									1.836	-69.517
1.837	-61.864									1.837	-69.517
1.838	-61.864									1.838	-69.517
1.839	-61.864									1.839	-69.517
1.84	-61.864									1.84	-69.517
1.841	-61.864									1.841	-69.517
1.842	-61.864									1.842	-69.517
1.843	-61.864									1.843	-69.517
1.844	-61.864									1.844	-69.517
1.845	-61.864									1.845	-69.517
1.846	-61.864									1.846	-69.517
1.847	-61.864									1.847	-69.517
1.848	-61.864									1.848	-69.517
1.849	-61.864									1.849	-69.517
1.85	-61.864									1.85	-69.517
1.851	-61.864									1.851	-69.517
1.852	-61.864									1.852	-69.517
1.853	-61.864									1.853	-69.517
1.854	-61.864									1.854	-69.517
1.855	-61.864									1.855	-69.517
1.856	-61.864									1.856	-69.517
1.857	-61.864									1.857	-69.517
1.858	-61.864									1.858	-69.517
1.859	-61.864									1.859	-69.517
1.86	-61.864									1.86	-69.517
1.861	-61.864									1.861	-69.517
1.862	-61.864									1.862	-69.517
1.863	-61.864									1.863	-69.517
1.864	-61.864									1.864	-69.517
1.865	-61.864									1.865	-69.517
1.866	-61.864									1.866	-69.517
1.867	-61.864									1.867	-69.517
1.868	-61.864									1.868	-69.517
1.869	-61.864									1.869	-69.517
1.87	-61.864									1.87	-69.517
1.871	-61.864									1.871	-69.517
1.872	-61.864									1.872	-69.517
1.873	-61.864									1.873	-69.517
1.874	-61.864									1.874	-69.517
1.875	-61.864									1.875	-69.517
1.876	-61.864									1.876	-69.517
1.877	-61.864									1.877	-69.517
1.878	-61.864									1.878	-69.517
1.879	-61.864									1.879	-69.517
1.88	-61.864									1.88	-69.517
1.881	-61.864									1.881	-69.517
1.882	-61.863									1.882	-69.517
1.883	-61.863									1.883	-69.517
1.884	-61.863									1.884	-69.517
1.885	-61.863									1.885	-69.517
1.886	-61.863									1.886	-69.517
1.887	-61.863									1.887	-69.517
1.888	-61.863									1.888	-69.517
1.889	-61.863									1.889	-69.517
1.89	-61.863									1.89	-69.517
1.891	-61.863									1.891	-69.517
1.892	-61.863									1.892	-69.517
1.893	-61.863									1.893	-69.517
1.894	-61.863									1.894	-69.517
1.895	-61.863									1.895	-69.517
1.896	-61.863									1.896	-69.517
1.897	-61.863									1.897	-69.517
1.898	-61.863									1.898	-69.517
1.899	-61.863									1.899	-69.517
1.9	-61.863									1.9	-69.517
1.901	-61.863									1.901	-69.517
1.902	-61.863									1.902	-69.517
1.903	-61.863									1.903	-69.517
1.904	-61.863									1.904	-69.517
1.905	-61.863									1.905	-69.517
1.906	-61.863									1.906	-69.517
1.907	-61.863									1.907	-69.517
1.908	-61.863									1.908	-69.517
1.909	-61.863									1.909	-69.517
1.91	-61.863									1.91	-69.517
1.911	-61.863									1.911	-69.517
1.912	-61.863									1.912	-69.517
1.913	-61.863									1.913	-69.517
1.914	-61.863									1.914	-69.517
1.915	-61.863									1.915	-69.517
1.916	-61.863									1.916	-69.517
1.917	-61.863									1.917	-69.517
1.918	-61.863									1.918	-69.517
1.919	-61.863									1.919	-69.517
1.92	-61.863									1.92	-69.517
1.921	-61.863									1.921	-69.517
1.922	-61.863									1.922	-69.517
1.923	-61.863									1.923	-69.517
1.924	-61.863									1.924	-69.517
1.925	-61.863									1.925	-69.517
1.926	-61.863									1.926	-69.517
1.927	-61.863									1.927	-69.517
1.928	-61.863									1.928	-69.517
1.929	-61.863									1.929	-69.517
1.93	-61.863									1.93	-69.517
1.931	-61.863									1.931	-69.517
1.932	-61.863									1.932	-69.517
1.933	-61.863									1.933	-69.517
1.934	-61.863									1.934	-69.517
1.935	-61.863									1.935	-69.517
1.936	-61.863									1.936	-69.517
1.937	-61.863									1.937	-69.517
1.938	-61.863									1.938	-69.517
1.939	-61.863									1.939	-69.517
1.94	-61.863									1.94	-69.517
1.941	-61.863									1.941	-69.517
1.942	-61.863									1.942	-69.517
1.943	-61.863									1.943	-69.517
1.944	-61.863									1.944	-69.517
1.945	-61.863									1.945	-69.517
1.946	-61.863									1.946	-69.517
1.947	-61.863									1.947	-69.517
1.948	-61.863									1.948	-69.517
1.949	-61.862									1.949	-69.517
1.95	-61.862									1.95	-69.517
1.951	-61.862									1.951	-69.517
1.952	-61.862									1.952	-69.517
1.953	-61.862									1.953	-69.517
1.954	-61.862									1.954	-69.517
1.955	-61.862									1.955	-69.517
1.956	-61.862									1.956	-69.517
1.957	-61.862									1.957	-69.517
1.958	-61.862									1.958	-69.517
1.959	-61.862									1.959	-69.517
1.96	-61.862									1.96	-69.517
1.961	-61.862									1.961	-69.517
1.962	-61.862									1.962	-69.517
1.963	-61.862									1.963	-69.517
1.964	-61.862									1.964	-69.517
1.965	-61.862									1.965	-69.517
1.966	-61.862									1.966	-69.517
1.967	-61.862									1.967	-69.517
1.968	-61.862									1.968	-69.517
1.969	-61.862									1.969	-69.517
1.97	-61.862									1.97	-69.517
1.971	-61.862									1.971	-69.517
1.972	-61.862									1.972	-69.517
1.973	-61.862									1.973	-69.517
1.974	-61.862									1.974	-69.517
1.975	-61.862									1.975	-69.517
1.976	-61.862									1.976	-69.517
1.977	-61.862									1.977	-69.517
1.978	-61.862									1.978	-69.517
1.979	-61.862									1.979	-69.517
1.98	-61.862									1.98	-69.517
1.981	-61.862									1.981	-69.517
1.982	-61.862									1.982	-69.517
1.983	-61.862									1.983	-69.517
1.984	-61.862									1.984	-69.517
1.985	-61.862									1.985	-69.517
1.986	-61.862									1.986	-69.517
1.987	-61.862									1.987	-69.517
1.988	-61.862									1.988	-69.517
1.989	-61.862									1.989	-69.517
1.99	-61.862									1.99	-69.517
1.991	-61.862									1.991	-69.517
1.992	-61.862									1.992	-69.517
1.993	-61.862									1.993	-69.517
1.994	-61.862									1.994	-69.517
1.995	-61.862									1.995	-69.517
1.996	-61.862									1.996	-69.517
1.997	-61.862									1.997	-69.517
[truncated: 10,005 more rows]

## Sheet: Figure 13B
Figure 13 B1										Figure 13 B2
Time	Voltage									Time	Voltage
0	-72.914									0	-67.091
0.001	-72.996									0.001	-66.916
0.002	-73.06									0.002	-66.738
0.003	-73.109									0.003	-66.555
0.004	-73.145									0.004	-66.368
0.005	-73.168									0.005	-66.175
0.006	-73.181									0.006	-65.974
0.007	-73.184									0.007	-65.763
0.008	-73.179									0.008	-65.54
0.009	-73.166									0.009	-65.302
0.01	-73.146									0.01	-65.045
0.011	-73.12									0.011	-64.763
0.012	-73.089									0.012	-64.448
0.013	-73.052									0.013	-64.09
0.014	-73.012									0.014	-63.67
0.015	-72.967									0.015	-63.161
0.016	-72.919									0.016	-62.513
0.017	-72.868									0.017	-61.63
0.018	-72.814									0.018	-60.283
0.019	-72.758									0.019	-57.735
0.02	-72.7									0.02	-49.352
0.021	-72.639									0.021	42.152
0.022	-72.577									0.022	38.905
0.023	-72.514									0.023	34.531
0.024	-72.449									0.024	30.059
0.025	-72.384									0.025	25.374
0.026	-72.317									0.026	20.346
0.027	-72.249									0.027	14.861
0.028	-72.181									0.028	8.8722
0.029	-72.112									0.029	2.5119
0.03	-72.042									0.03	-4.0137
0.031	-71.973									0.031	-10.634
0.032	-71.902									0.032	-17.589
0.033	-71.832									0.033	-25.269
0.034	-71.761									0.034	-33.032
0.035	-71.69									0.035	-39.901
0.036	-71.619									0.036	-47.379
0.037	-71.547									0.037	-54.232
0.038	-71.476									0.038	-60.678
0.039	-71.404									0.039	-65.582
0.04	-71.333									0.04	-68.637
0.041	-71.261									0.041	-70.443
0.042	-71.189									0.042	-71.498
0.043	-71.118									0.043	-72.112
0.044	-71.046									0.044	-72.464
0.045	-70.974									0.045	-72.656
0.046	-70.903									0.046	-72.748
0.047	-70.831									0.047	-72.774
0.048	-70.759									0.048	-72.757
0.049	-70.688									0.049	-72.707
0.05	-70.616									0.05	-72.634
0.051	-70.544									0.051	-72.543
0.052	-70.473									0.052	-72.438
0.053	-70.401									0.053	-72.321
0.054	-70.329									0.054	-72.193
0.055	-70.257									0.055	-72.058
0.056	-70.186									0.056	-71.915
0.057	-70.114									0.057	-71.766
0.058	-70.042									0.058	-71.612
0.059	-69.97									0.059	-71.454
0.06	-69.898									0.06	-71.292
0.061	-69.826									0.061	-71.127
0.062	-69.754									0.062	-70.959
0.063	-69.682									0.063	-70.79
0.064	-69.61									0.064	-70.619
0.065	-69.537									0.065	-70.447
0.066	-69.464									0.066	-70.275
0.067	-69.392									0.067	-70.102
0.068	-69.319									0.068	-69.929
0.069	-69.246									0.069	-69.756
0.07	-69.172									0.07	-69.583
0.071	-69.099									0.071	-69.411
0.072	-69.025									0.072	-69.24
0.073	-68.951									0.073	-69.069
0.074	-68.876									0.074	-68.899
0.075	-68.801									0.075	-68.73
0.076	-68.726									0.076	-68.561
0.077	-68.651									0.077	-68.393
0.078	-68.575									0.078	-68.225
0.079	-68.498									0.079	-68.057
0.08	-68.421									0.08	-67.889
0.081	-68.344									0.081	-67.721
0.082	-68.266									0.082	-67.552
0.083	-68.187									0.083	-67.382
0.084	-68.108									0.084	-67.211
0.085	-68.028									0.085	-67.038
0.086	-67.947									0.086	-66.862
0.087	-67.866									0.087	-66.682
0.088	-67.783									0.088	-66.499
0.089	-67.7									0.089	-66.31
0.09	-67.615									0.09	-66.114
0.091	-67.529									0.091	-65.911
0.092	-67.442									0.092	-65.696
0.093	-67.354									0.093	-65.469
0.094	-67.264									0.094	-65.226
0.095	-67.172									0.095	-64.962
0.096	-67.079									0.096	-64.671
0.097	-66.984									0.097	-64.344
0.098	-66.886									0.098	-63.969
0.099	-66.786									0.099	-63.526
0.1	-66.683									0.1	-62.981
0.101	-66.577									0.101	-62.276
0.102	-66.468									0.102	-61.287
0.103	-66.355									0.103	-59.702
0.104	-66.238									0.104	-56.36
0.105	-66.116									0.105	-39.424
0.106	-65.989									0.106	41.842
0.107	-65.855									0.107	37.582
0.108	-65.714									0.108	33.173
0.109	-65.564									0.109	28.652
0.11	-65.405									0.11	23.877
0.111	-65.233									0.111	18.728
0.112	-65.047									0.112	13.088
0.113	-64.843									0.113	6.9639
0.114	-64.617									0.114	0.53097
0.115	-64.362									0.115	-6.0168
0.116	-64.071									0.116	-12.699
0.117	-63.731									0.117	-19.845
0.118	-63.322									0.118	-27.708
0.119	-62.81									0.119	-35.18
0.12	-62.137									0.12	-42.106
0.121	-61.18									0.121	-49.558
0.122	-59.624									0.122	-56.257
0.123	-56.292									0.123	-62.389
0.124	-39.232									0.124	-66.683
0.125	41.368									0.125	-69.292
0.126	37.116									0.126	-70.826
0.127	32.723									0.127	-71.722
0.128	28.242									0.128	-72.241
0.129	23.545									0.129	-72.536
0.13	18.527									0.13	-72.693
0.131	13.093									0.131	-72.762
0.132	7.2659									0.132	-72.773
0.133	1.2063									0.133	-72.745
0.134	-4.8888									0.134	-72.687
0.135	-10.956									0.135	-72.609
0.136	-17.108									0.136	-72.513
0.137	-23.469									0.137	-72.404
0.138	-29.608									0.138	-72.283
0.139	-34.608									0.139	-72.153
0.14	-38.5									0.14	-72.015
0.141	-41.86									0.141	-71.87
0.142	-44.235									0.142	-71.72
0.143	-44.288									0.143	-71.564
0.144	-38.567									0.144	-71.405
0.145	-4.8129									0.145	-71.242
0.146	10.89									0.146	-71.076
0.147	8.1491									0.147	-70.908
0.148	3.4381									0.148	-70.738
0.149	-1.5968									0.149	-70.567
0.15	-6.6937									0.15	-70.394
0.151	-11.769									0.151	-70.222
0.152	-16.805									0.152	-70.049
0.153	-21.744									0.153	-69.876
0.154	-26.345									0.154	-69.703
0.155	-30.253									0.155	-69.531
0.156	-33.344									0.156	-69.359
0.157	-35.806									0.157	-69.188
0.158	-37.897									0.158	-69.017
0.159	-39.737									0.159	-68.847
0.16	-41.158									0.16	-68.678
0.161	-41.597									0.161	-68.509
0.162	-40.113									0.162	-68.341
0.163	-35.436									0.163	-68.173
0.164	-27.326									0.164	-68.005
0.165	-17.682									0.165	-67.838
0.166	-13.126									0.166	-67.669
0.167	-13.939									0.167	-67.5
0.168	-17.209									0.168	-67.33
0.169	-21.412									0.169	-67.158
0.17	-25.798									0.17	-66.984
0.171	-29.837									0.171	-66.807
0.172	-33.264									0.172	-66.627
0.173	-36.181									0.173	-66.442
0.174	-38.875									0.174	-66.251
0.175	-41.494									0.175	-66.053
0.176	-43.581									0.176	-65.846
0.177	-44.099									0.177	-65.628
0.178	-40.996									0.178	-65.397
0.179	-22.053									0.179	-65.147
0.18	8.4506									0.18	-64.876
0.181	8.6174									0.181	-64.575
0.182	4.7073									0.182	-64.235
0.183	0.24883									0.183	-63.842
0.184	-4.4208									0.184	-63.372
0.185	-9.2222									0.185	-62.786
0.186	-14.135									0.186	-62.011
0.187	-19.156									0.187	-60.888
0.188	-24.194									0.188	-58.974
0.189	-28.946									0.189	-54.257
0.19	-33.095									0.19	19.551
0.191	-36.705									0.191	40.59
0.192	-40.195									0.192	36.247
0.193	-43.659									0.193	31.814
0.194	-46.194									0.194	27.222
0.195	-47.198									0.195	22.349
0.196	-45.995									0.196	17.05
0.197	-34.817									0.197	11.253
0.198	20.011									0.198	5.0091
0.199	18.402									0.199	-1.4718
0.2	14.676									0.2	-8.0451
0.201	10.772									0.201	-14.822
0.202	6.6784									0.202	-22.199
0.203	2.3587									0.203	-30.124
0.204	-2.1813									0.204	-37.259
0.205	-6.9356									0.205	-44.441
0.206	-11.917									0.206	-51.648
0.207	-17.185									0.207	-58.272
0.208	-22.789									0.208	-63.921
0.209	-28.512									0.209	-67.634
0.21	-33.816									0.21	-69.853
0.211	-38.656									0.211	-71.154
0.212	-43.613									0.212	-71.913
0.213	-47.91									0.213	-72.351
0.214	-51.091									0.214	-72.596
0.215	-53.883									0.215	-72.721
0.216	-56.792									0.216	-72.77
0.217	-59.831									0.217	-72.768
0.218	-62.66									0.218	-72.73
0.219	-65.014									0.219	-72.665
0.22	-66.85									0.22	-72.581
0.221	-68.243									0.221	-72.481
0.222	-69.296									0.222	-72.368
0.223	-70.099									0.223	-72.244
0.224	-70.721									0.224	-72.111
0.225	-71.211									0.225	-71.971
0.226	-71.603									0.226	-71.825
0.227	-71.92									0.227	-71.672
0.228	-72.18									0.228	-71.516
0.229	-72.394									0.229	-71.355
0.23	-72.571									0.23	-71.191
0.231	-72.716									0.231	-71.024
0.232	-72.836									0.232	-70.856
0.233	-72.933									0.233	-70.685
0.234	-73.011									0.234	-70.514
0.235	-73.072									0.235	-70.342
0.236	-73.118									0.236	-70.169
0.237	-73.15									0.237	-69.996
0.238	-73.171									0.238	-69.823
0.239	-73.182									0.239	-69.65
0.24	-73.183									0.24	-69.478
0.241	-73.176									0.241	-69.306
0.242	-73.162									0.242	-69.135
0.243	-73.14									0.243	-68.965
0.244	-73.113									0.244	-68.795
0.245	-73.081									0.245	-68.626
0.246	-73.043									0.246	-68.458
0.247	-73.002									0.247	-68.29
0.248	-72.957									0.248	-68.122
0.249	-72.908									0.249	-67.954
0.25	-72.856									0.25	-67.786
0.251	-72.802									0.251	-67.618
0.252	-72.745									0.252	-67.448
0.253	-72.686									0.253	-67.278
0.254	-72.625									0.254	-67.105
0.255	-72.563									0.255	-66.93
0.256	-72.499									0.256	-66.753
0.257	-72.434									0.257	-66.571
0.258	-72.368									0.258	-66.384
0.259	-72.301									0.259	-66.191
0.26	-72.234									0.26	-65.991
0.261	-72.165									0.261	-65.781
0.262	-72.096									0.262	-65.559
0.263	-72.027									0.263	-65.323
0.264	-71.957									0.264	-65.067
0.265	-71.886									0.265	-64.788
0.266	-71.816									0.266	-64.476
0.267	-71.745									0.267	-64.122
0.268	-71.674									0.268	-63.708
0.269	-71.602									0.269	-63.208
0.27	-71.531									0.27	-62.575
0.271	-71.46									0.271	-61.717
0.272	-71.388									0.272	-60.425
0.273	-71.316									0.273	-58.039
0.274	-71.245									0.274	-50.766
0.275	-71.173									0.275	41.432
0.276	-71.101									0.276	39.271
0.277	-71.03									0.277	34.894
0.278	-70.958									0.278	30.438
0.279	-70.886									0.279	25.775
0.28	-70.815									0.28	20.781
0.281	-70.743									0.281	15.338
0.282	-70.671									0.282	9.3887
0.283	-70.6									0.283	3.0514
0.284	-70.528									0.284	-3.4668
0.285	-70.456									0.285	-10.075
0.286	-70.385									0.286	-16.985
0.287	-70.313									0.287	-24.603
0.288	-70.241									0.288	-32.425
0.289	-70.169									0.289	-39.322
0.29	-70.098									0.29	-46.762
0.291	-70.026									0.291	-53.678
0.292	-69.954									0.292	-60.18
0.293	-69.882									0.293	-65.25
0.294	-69.81									0.294	-68.438
0.295	-69.738									0.295	-70.326
0.296	-69.665									0.296	-71.43
0.297	-69.593									0.297	-72.073
0.298	-69.521									0.298	-72.442
0.299	-69.448									0.299	-72.644
0.3	-69.375									0.3	-72.743
0.301	-69.302									0.301	-72.774
0.302	-69.229									0.302	-72.76
0.303	-69.155									0.303	-72.712
0.304	-69.082									0.304	-72.641
0.305	-69.008									0.305	-72.552
0.306	-68.934									0.306	-72.447
0.307	-68.859									0.307	-72.331
0.308	-68.784									0.308	-72.204
0.309	-68.709									0.309	-72.069
0.31	-68.633									0.31	-71.927
0.311	-68.557									0.311	-71.779
0.312	-68.481									0.312	-71.625
0.313	-68.404									0.313	-71.467
0.314	-68.326									0.314	-71.305
0.315	-68.248									0.315	-71.14
0.316	-68.169									0.316	-70.973
0.317	-68.09									0.317	-70.804
0.318	-68.01									0.318	-70.633
0.319	-67.929									0.319	-70.461
0.32	-67.847									0.32	-70.289
0.321	-67.764									0.321	-70.116
0.322	-67.681									0.322	-69.943
0.323	-67.596									0.323	-69.77
0.324	-67.51									0.324	-69.598
0.325	-67.422									0.325	-69.426
0.326	-67.334									0.326	-69.254
0.327	-67.243									0.327	-69.083
0.328	-67.151									0.328	-68.913
0.329	-67.057									0.329	-68.744
0.33	-66.961									0.33	-68.575
0.331	-66.863									0.331	-68.406
0.332	-66.763									0.332	-68.238
0.333	-66.659									0.333	-68.071
0.334	-66.553									0.334	-67.903
0.335	-66.443									0.335	-67.735
0.336	-66.329									0.336	-67.566
0.337	-66.211									0.337	-67.396
0.338	-66.088									0.338	-67.225
0.339	-65.959									0.339	-67.052
0.34	-65.824									0.34	-66.876
0.341	-65.681									0.341	-66.697
0.342	-65.529									0.342	-66.514
0.343	-65.367									0.343	-66.326
0.344	-65.192									0.344	-66.131
0.345	-65.002									0.345	-65.928
0.346	-64.793									0.346	-65.714
0.347	-64.561									0.347	-65.488
0.348	-64.3									0.348	-65.246
0.349	-63.999									0.349	-64.984
0.35	-63.645									0.35	-64.696
0.351	-63.215									0.351	-64.372
0.352	-62.674									0.352	-64.002
0.353	-61.95									0.353	-63.565
0.354	-60.896									0.354	-63.03
0.355	-59.106									0.355	-62.341
0.356	-54.823									0.356	-61.382
0.357	2.6041									0.357	-59.868
0.358	40.45									0.358	-56.775
0.359	36.127									0.359	-43.399
0.36	31.716									0.36	42.103
0.361	27.193									0.361	37.947
0.362	22.435									0.362	33.541
0.363	17.33									0.363	29.021
0.364	11.794									0.364	24.277
0.365	5.9002									0.365	19.167
0.366	-0.18241									0.366	13.561
0.367	-6.2711									0.367	7.4759
0.368	-12.342									0.368	1.0591
0.369	-18.538									0.369	-5.4835
0.37	-24.921									0.37	-12.146
0.371	-30.867									0.371	-19.237
0.372	-35.566									0.372	-27.061
0.373	-39.303									0.373	-34.618
0.374	-42.532									0.374	-41.505
0.375	-44.505									0.375	-48.989
0.376	-43.758									0.376	-55.72
0.377	-35.001									0.377	-61.952
0.378	2.9945									0.378	-66.406
0.379	10.715									0.379	-69.128
0.38	7.1086									0.38	-70.73
0.381	2.2754									0.381	-71.666
0.382	-2.7882									0.382	-72.209
0.383	-7.8842									0.383	-72.518
0.384	-12.952									0.384	-72.684
0.385	-17.975									0.385	-72.758
0.386	-22.866									0.386	-72.774
0.387	-27.335									0.387	-72.748
0.388	-31.048									0.388	-72.693
0.389	-33.968									0.389	-72.616
0.39	-36.323									0.39	-72.521
0.391	-38.352									0.391	-72.413
0.392	-40.123									0.392	-72.293
0.393	-41.378									0.393	-72.164
0.394	-41.466									0.394	-72.026
0.395	-39.342									0.395	-71.882
0.396	-33.813									0.396	-71.732
0.397	-24.996									0.397	-71.577
0.398	-15.975									0.398	-71.418
0.399	-12.959									0.399	-71.255
0.4	-14.562									0.4	-71.089
0.401	-18.146									0.401	-70.921
0.402	-22.448									0.402	-70.752
0.403	-26.793									0.403	-70.581
0.404	-30.698									0.404	-70.408
0.405	-33.984									0.405	-70.236
0.406	-36.821									0.406	-70.063
0.407	-39.497									0.407	-69.89
0.408	-42.062									0.408	-69.717
0.409	-43.885									0.409	-69.545
0.41	-43.833									0.41	-69.373
0.411	-39.044									0.411	-69.202
0.412	-11.026									0.412	-69.031
0.413	9.5535									0.413	-68.861
0.414	7.8142									0.414	-68.692
0.415	3.7008									0.415	-68.523
0.416	-0.81941									0.416	-68.355
0.417	-5.5233									0.417	-68.187
0.418	-10.351									0.418	-68.019
0.419	-15.289									0.419	-67.851
0.42	-20.329									0.42	-67.683
0.421	-25.334									0.421	-67.514
0.422	-29.966									0.422	-67.344
0.423	-33.966									0.423	-67.172
0.424	-37.505									0.424	-66.999
0.425	-41.015									0.425	-66.822
0.426	-44.362									0.426	-66.642
0.427	-46.568									0.427	-66.457
0.428	-47.17									0.428	-66.267
0.429	-45.088									0.429	-66.07
0.43	-21.685									0.43	-65.864
0.431	20.571									0.431	-65.647
0.432	17.585									0.432	-65.416
0.433	13.816									0.433	-65.169
0.434	9.871									0.434	-64.899
0.435	5.7303									0.435	-64.601
0.436	1.3606									0.436	-64.265
0.437	-3.2281									0.437	-63.877
0.438	-8.03									0.438	-63.415
0.439	-13.068									0.439	-62.841
0.44	-18.411									0.44	-62.086
0.441	-24.075									0.441	-61.002
0.442	-29.751									0.442	-59.19
0.443	-34.919									0.443	-54.931
0.444	-39.744									0.444	1.3645
0.445	-44.676									0.445	40.947
0.446	-48.696									0.446	36.609
0.447	-51.722									0.447	32.189
0.448	-54.509									0.448	27.615
0.449	-57.463									0.449	22.77
0.45	-60.487									0.45	17.51
0.451	-63.226									0.451	11.756
0.452	-65.463									0.452	5.5419
0.453	-67.193									0.453	-0.92691
0.454	-68.502									0.454	-7.4929
0.455	-69.493									0.455	-14.24
0.456	-70.251									0.456	-21.552
0.457	-70.84									0.457	-29.475
0.458	-71.306									0.458	-36.699
0.459	-71.679									0.459	-43.802
0.46	-71.983									0.46	-51.088
0.461	-72.231									0.461	-57.731
0.462	-72.436									0.462	-63.524
0.463	-72.606									0.463	-67.39
0.464	-72.745									0.464	-69.71
0.465	-72.86									0.465	-71.07
0.466	-72.952									0.466	-71.864
0.467	-73.026									0.467	-72.323
0.468	-73.083									0.468	-72.581
0.469	-73.126									0.469	-72.714
0.47	-73.156									0.47	-72.769
0.471	-73.175									0.471	-72.77
0.472	-73.183									0.472	-72.734
0.473	-73.183									0.473	-72.671
0.474	-73.174									0.474	-72.588
0.475	-73.158									0.475	-72.489
0.476	-73.135									0.476	-72.377
0.477	-73.107									0.477	-72.255
0.478	-73.073									0.478	-72.123
0.479	-73.035									0.479	-71.983
0.48	-72.992									0.48	-71.837
0.481	-72.946									0.481	-71.685
0.482	-72.897									0.482	-71.529
0.483	-72.845									0.483	-71.369
0.484	-72.79									0.484	-71.205
0.485	-72.732									0.485	-71.038
0.486	-72.673									0.486	-70.87
0.487	-72.612									0.487	-70.7
0.488	-72.549									0.488	-70.528
0.489	-72.485									0.489	-70.356
0.49	-72.42									0.49	-70.183
0.491	-72.354									0.491	-70.01
0.492	-72.287									0.492	-69.837
0.493	-72.219									0.493	-69.665
0.494	-72.15									0.494	-69.492
0.495	-72.081									0.495	-69.321
0.496	-72.012									0.496	-69.15
0.497	-71.941									0.497	-68.979
0.498	-71.871									0.498	-68.809
0.499	-71.8									0.499	-68.64
0.5	-71.729									0.5	-68.472
0.501	-71.658									0.501	-68.304
0.502	-71.587									0.502	-68.136
0.503	-71.516									0.503	-67.968
0.504	-71.444									0.504	-67.8
0.505	-71.373									0.505	-67.631
0.506	-71.301									0.506	-67.462
0.507	-71.229									0.507	-67.292
0.508	-71.158									0.508	-67.119
0.509	-71.086									0.509	-66.945
0.51	-71.014									0.51	-66.767
0.511	-70.942									0.511	-66.586
0.512	-70.871									0.512	-66.399
0.513	-70.799									0.513	-66.207
0.514	-70.727									0.514	-66.007
0.515	-70.656									0.515	-65.798
0.516	-70.584									0.516	-65.578
0.517	-70.512									0.517	-65.343
0.518	-70.441									0.518	-65.089
0.519	-70.369									0.519	-64.811
0.52	-70.297									0.52	-64.503
0.521	-70.226									0.521	-64.152
0.522	-70.154									0.522	-63.744
0.523	-70.082									0.523	-63.252
0.524	-70.01									0.524	-62.632
0.525	-69.938									0.525	-61.798
0.526	-69.866									0.526	-60.555
0.527	-69.794									0.527	-58.312
0.528	-69.722									0.528	-51.901
0.529	-69.65									0.529	39.674
0.53	-69.577									0.53	39.629
0.531	-69.505									0.531	35.248
0.532	-69.432									0.532	30.796
0.533	-69.359									0.533	26.155
0.534	-69.286									0.534	21.198
0.535	-69.213									0.535	15.801
0.536	-69.14									0.536	9.8864
0.537	-69.066									0.537	3.5738
0.538	-68.992									0.538	-2.9353
0.539	-68.918									0.539	-9.5327
0.54	-68.843									0.54	-16.403
0.541	-68.768									0.541	-23.959
0.542	-68.693									0.542	-31.824
0.543	-68.617									0.543	-38.767
0.544	-68.541									0.544	-46.153
0.545	-68.464									0.545	-53.14
0.546	-68.387									0.546	-59.685
0.547	-68.309									0.547	-64.915
0.548	-68.231									0.548	-68.237
0.549	-68.152									0.549	-70.208
0.55	-68.073									0.55	-71.361
0.551	-67.992									0.551	-72.033
0.552	-67.911									0.552	-72.419
0.553	-67.829									0.553	-72.632
0.554	-67.746									0.554	-72.738
0.555	-67.662									0.555	-72.773
0.556	-67.577									0.556	-72.762
0.557	-67.491									0.557	-72.717
0.558	-67.403									0.558	-72.648
0.559	-67.314									0.559	-72.56
0.56	-67.223									0.56	-72.456
0.561	-67.131									0.561	-72.341
0.562	-67.037									0.562	-72.215
0.563	-66.94									0.563	-72.081
0.564	-66.842									0.564	-71.939
0.565	-66.741									0.565	-71.791
0.566	-66.637									0.566	-71.638
0.567	-66.529									0.567	-71.48
0.568	-66.419									0.568	-71.319
0.569	-66.304									0.569	-71.154
0.57	-66.185									0.57	-70.987
0.571	-66.06									0.571	-70.818
0.572	-65.93									0.572	-70.647
0.573	-65.793									0.573	-70.475
0.574	-65.649									0.574	-70.303
0.575	-65.495									0.575	-70.13
0.576	-65.33									0.576	-69.957
0.577	-65.152									0.577	-69.784
0.578	-64.958									0.578	-69.612
0.579	-64.745									0.579	-69.44
0.58	-64.508									0.58	-69.268
0.581	-64.238									0.581	-69.097
0.582	-63.927									0.582	-68.927
0.583	-63.559									0.583	-68.758
0.584	-63.11									0.584	-68.589
0.585	-62.536									0.585	-68.42
0.586	-61.758									0.586	-68.252
0.587	-60.596									0.587	-68.084
0.588	-58.52									0.588	-67.917
0.589	-52.845									0.589	-67.748
0.59	35.328									0.59	-67.58
0.591	39.526									0.591	-67.41
0.592	35.166									0.592	-67.239
0.593	30.763									0.593	-67.066
0.594	26.197									0.594	-66.891
0.595	21.365									0.595	-66.712
0.596	16.163									0.596	-66.529
0.597	10.546									0.597	-66.341
0.598	4.5894									0.598	-66.147
0.599	-1.5061									0.599	-65.945
0.6	-7.5854									0.6	-65.732
0.601	-13.668									0.601	-65.508
0.602	-19.914									0.602	-65.267
0.603	-26.285									0.603	-65.007
0.604	-32									0.604	-64.721
0.605	-36.433									0.605	-64.401
0.606	-40.051									0.606	-64.035
0.607	-43.112									0.607	-63.605
0.608	-44.638									0.608	-63.08
0.609	-42.95									0.609	-62.407
0.61	-29.835									0.61	-61.478
0.611	7.3813									0.611	-60.03
0.612	10.203									0.612	-57.162
0.613	6.1011									0.613	-46.186
0.614	1.1882									0.614	42.298
0.615	-3.8933									0.615	38.308
0.616	-8.9859									0.616	33.914
0.617	-14.045									0.617	29.407
0.618	-19.053									0.618	24.687
0.619	-23.883									0.619	19.611
0.62	-28.211									0.62	14.048
0.621	-31.743									0.621	7.9993
0.622	-34.517									0.622	1.601
0.623	-36.784									0.623	-4.9352
0.624	-38.76									0.624	-11.581
0.625	-40.456									0.625	-18.618
0.626	-41.525									0.626	-26.394
0.627	-41.238									0.627	-34.035
0.628	-38.452									0.628	-40.899
0.629	-32.162									0.629	-48.397
0.63	-22.797									0.63	-55.165
0.631	-14.761									0.631	-61.488
0.632	-13.03									0.632	-66.109
0.633	-15.233									0.633	-68.952
0.634	-19.046									0.634	-70.627
0.635	-23.407									0.635	-71.606
0.636	-27.691									0.636	-72.174
0.637	-31.462									0.637	-72.499
0.638	-34.628									0.638	-72.674
0.639	-37.407									0.639	-72.755
0.64	-40.073									0.64	-72.774
0.641	-42.557									0.641	-72.751
0.642	-44.08									0.642	-72.698
0.643	-43.4									0.643	-72.623
0.644	-36.356									0.644	-72.53
0.645	-1.9544									0.645	-72.422
0.646	9.7812									0.646	-72.303
0.647	6.9939									0.647	-72.175
0.648	2.7459									0.648	-72.038
0.649	-1.8225									0.649	-71.895
0.65	-6.5566									0.65	-71.745
0.651	-11.407									0.651	-71.59
0.652	-16.37									0.652	-71.431
0.653	-21.421									0.653	-71.269
0.654	-26.379									0.654	-71.103
0.655	-30.883									0.655	-70.935
0.656	-34.754									0.656	-70.766
0.657	-38.252									0.657	-70.595
0.658	-41.781									0.658	-70.423
0.659	-44.96									0.659	-70.25
0.66	-46.843									0.66	-70.077
0.661	-47.038									0.661	-69.904
0.662	-43.8									0.662	-69.732
0.663	-0.038973									0.663	-69.559
0.664	20.225									0.664	-69.387
0.665	16.79									0.665	-69.216
0.666	12.985									0.666	-69.045
0.667	8.9997									0.667	-68.875
0.668	4.8114									0.668	-68.706
0.669	0.39434									0.669	-68.537
0.67	-4.2408									0.67	-68.369
0.671	-9.0899									0.671	-68.201
0.672	-14.186									0.672	-68.033
0.673	-19.603									0.673	-67.865
0.674	-25.312									0.674	-67.697
0.675	-30.914									0.675	-67.528
0.676	-35.959									0.676	-67.358
0.677	-40.807									0.677	-67.187
0.678	-45.658									0.678	-67.013
0.679	-49.4									0.679	-66.837
0.68	-52.32									0.68	-66.657
0.681	-55.127									0.681	-66.472
0.682	-58.121									0.682	-66.283
0.683	-61.114									0.683	-66.086
0.684	-63.755									0.684	-65.881
0.685	-65.878									0.685	-65.665
0.686	-67.507									0.686	-65.436
0.687	-68.74									0.687	-65.19
0.688	-69.674									0.688	-64.922
0.689	-70.391									0.689	-64.627
0.69	-70.95									0.69	-64.294
0.691	-71.393									0.691	-63.911
0.692	-71.75									0.692	-63.455
0.693	-72.041									0.693	-62.892
0.694	-72.279									0.694	-62.156
0.695	-72.476									0.695	-61.108
0.696	-72.638									0.696	-59.385
0.697	-72.772									0.697	-55.501
0.698	-72.881									0.698	-21.452
0.699	-72.97									0.699	41.281
0.7	-73.04									0.7	36.947
0.701	-73.094									0.701	32.547
0.702	-73.134									0.702	27.995
0.703	-73.161									0.703	23.173
0.704	-73.178									0.704	17.952
0.705	-73.184									0.705	12.242
0.706	-73.182									0.706	6.0592
0.707	-73.171									0.707	-0.39858
0.708	-73.154									0.708	-6.9574
0.709	-73.13									0.709	-13.679
0.71	-73.1									0.71	-20.928
0.711	-73.066									0.711	-28.84
0.712	-73.026									0.712	-36.151
0.713	-72.983									0.713	-43.18
0.714	-72.936									0.714	-50.538
0.715	-72.886									0.715	-57.2
0.716	-72.833									0.716	-63.125
0.717	-72.778									0.717	-67.143
0.718	-72.72									0.718	-69.564
0.719	-72.66									0.719	-70.985
0.72	-72.599									0.72	-71.814
0.721	-72.536									0.721	-72.294
0.722	-72.472									0.722	-72.565
0.723	-72.406									0.723	-72.707
0.724	-72.34									0.724	-72.766
0.725	-72.273									0.725	-72.771
0.726	-72.205									0.726	-72.738
0.727	-72.136									0.727	-72.677
0.728	-72.067									0.728	-72.596
0.729	-71.997									0.729	-72.498
0.73	-71.927									0.73	-72.387
0.731	-71.856									0.731	-72.265
0.732	-71.785									0.732	-72.134
0.733	-71.715									0.733	-71.995
0.734	-71.643									0.734	-71.849
0.735	-71.572									0.735	-71.698
0.736	-71.501									0.736	-71.542
0.737	-71.429									0.737	-71.382
0.738	-71.358									0.738	-71.218
0.739	-71.286									0.739	-71.052
0.74	-71.214									0.74	-70.884
0.741	-71.143									0.741	-70.713
0.742	-71.071									0.742	-70.542
0.743	-70.999									0.743	-70.37
0.744	-70.927									0.744	-70.197
0.745	-70.856									0.745	-70.024
0.746	-70.784									0.746	-69.851
0.747	-70.712									0.747	-69.679
0.748	-70.641									0.748	-69.506
0.749	-70.569									0.749	-69.335
0.75	-70.497									0.75	-69.164
0.751	-70.426									0.751	-68.993
0.752	-70.354									0.752	-68.823
0.753	-70.282									0.753	-68.654
0.754	-70.211									0.754	-68.486
0.755	-70.139									0.755	-68.317
0.756	-70.067									0.756	-68.15
0.757	-69.995									0.757	-67.982
0.758	-69.923									0.758	-67.814
0.759	-69.851									0.759	-67.645
0.76	-69.779									0.76	-67.476
0.761	-69.707									0.761	-67.306
0.762	-69.635									0.762	-67.134
0.763	-69.562									0.763	-66.959
0.764	-69.49									0.764	-66.782
0.765	-69.417									0.765	-66.601
0.766	-69.344									0.766	-66.415
0.767	-69.271									0.767	-66.223
0.768	-69.198									0.768	-66.024
0.769	-69.124									0.769	-65.816
0.77	-69.05									0.77	-65.597
0.771	-68.976									0.771	-65.363
0.772	-68.902									0.772	-65.111
0.773	-68.827									0.773	-64.836
0.774	-68.752									0.774	-64.53
0.775	-68.677									0.775	-64.184
0.776	-68.601									0.776	-63.781
0.777	-68.525									0.777	-63.298
0.778	-68.448									0.778	-62.691
0.779	-68.371									0.779	-61.88
0.78	-68.293									0.78	-60.684
0.781	-68.215									0.781	-58.577
0.782	-68.136									0.782	-52.898
0.783	-68.056									0.783	35.835
0.784	-67.976									0.784	39.988
0.785	-67.894									0.785	35.62
0.786	-67.812									0.786	31.171
0.787	-67.729									0.787	26.551
0.788	-67.645									0.788	21.628
0.789	-67.559									0.789	16.271
0.79	-67.473									0.79	10.397
0.791	-67.385									0.791	4.1108
0.792	-67.295									0.792	-2.3892
0.793	-67.204									0.793	-8.977
0.794	-67.112									0.794	-15.809
0.795	-67.017									0.795	-23.299
0.796	-66.92									0.796	-31.198
0.797	-66.821									0.797	-38.202
0.798	-66.719									0.798	-45.521
0.799	-66.614									0.799	-52.585
0.8	-66.507									0.8	-59.166
0.801	-66.395									0.801	-64.556
0.802	-66.279									0.802	-68.02
0.803	-66.159									0.803	-70.081
0.804	-66.034									0.804	-71.287
0.805	-65.902									0.805	-71.99
0.806	-65.764									0.806	-72.395
0.807	-65.617									0.807	-72.619
0.808	-65.461									0.808	-72.732
0.809	-65.294									0.809	-72.773
0.81	-65.113									0.81	-72.764
0.811	-64.916									0.811	-72.722
0.812	-64.698									0.812	-72.654
0.813	-64.454									0.813	-72.568
0.814	-64.177									0.814	-72.465
0.815	-63.856									0.815	-72.351
0.816	-63.473									0.816	-72.226
0.817	-63.002									0.817	-72.092
0.818	-62.395									0.818	-71.951
0.819	-61.557									0.819	-71.804
0.82	-60.269									0.82	-71.651
0.821	-57.833									0.821	-71.493
0.822	-49.991									0.822	-71.332
0.823	41.439									0.823	-71.168
0.824	38.617									0.824	-71.001
0.825	34.254									0.825	-70.832
0.826	29.826									0.826	-70.661
0.827	25.214									0.827	-70.49
0.828	20.312									0.828	-70.317
0.829	15.025									0.829	-70.144
0.83	9.3229									0.83	-69.971
0.831	3.3222									0.831	-69.799
0.832	-2.7788									0.832	-69.626
0.833	-8.8513									0.833	-69.454
0.834	-14.952									0.834	-69.282
0.835	-21.247									0.835	-69.111
0.836	-27.568									0.836	-68.941
0.837	-33.028									0.837	-68.772
0.838	-37.231									0.838	-68.603
0.839	-40.751									0.839	-68.434
0.84	-43.605									0.84	-68.266
0.841	-44.635									0.841	-68.098
0.842	-41.804									0.842	-67.93
0.843	-21.905									0.843	-67.762
0.844	9.6666									0.844	-67.594
0.845	9.5416									0.845	-67.424
0.846	5.1358									0.846	-67.253
0.847	0.16411									0.847	-67.081
0.848	-4.9258									0.848	-66.905
0.849	-10.013									0.849	-66.727
0.85	-15.063									0.85	-66.545
0.851	-20.051									0.851	-66.357
0.852	-24.811									0.852	-66.163
0.853	-28.992									0.853	-65.962
0.854	-32.357									0.854	-65.75
0.855	-35.006									0.855	-65.526
0.856	-37.202									0.856	-65.288
0.857	-39.13									0.857	-65.029
0.858	-40.74									0.858	-64.745
0.859	-41.606									0.859	-64.428
0.86	-40.925									0.86	-64.067
0.861	-37.473									0.861	-63.643
0.862	-30.496									0.862	-63.127
0.863	-20.785									0.863	-62.469
0.864	-13.933									0.864	-61.567
0.865	-13.257									0.865	-60.179
0.866	-15.915									0.866	-57.503
0.867	-19.901									0.867	-48.168
0.868	-24.292									0.868	42.316
0.869	-28.499									0.869	38.647
0.87	-32.144									0.87	34.275
0.871	-35.21									0.871	29.788
0.872	-37.948									0.872	25.087
0.873	-40.605									0.873	20.037
0.874	-42.977									0.874	14.518
0.875	-44.175									0.875	8.5044
0.876	-42.773									0.876	2.1279
0.877	-32.805									0.877	-4.4028
0.878	3.5546									0.878	-11.033
0.879	9.521									0.879	-18.021
0.88	6.1657									0.88	-25.743
0.881	1.8268									0.881	-33.458
0.882	-2.783									0.882	-40.318
0.883	-7.5435									0.883	-47.812
0.884	-12.417									0.884	-54.626
0.885	-17.403									0.885	-61.025
0.886	-22.458									0.886	-65.809
0.887	-27.355									0.887	-68.773
0.888	-31.731									0.888	-70.522
0.889	-35.491									0.889	-71.545
0.89	-38.972									0.89	-72.139
0.891	-42.505									0.891	-72.479
0.892	-45.476									0.892	-72.664
0.893	-47.04									0.893	-72.751
0.894	-46.794									0.894	-72.774
0.895	-41.847									0.895	-72.754
0.896	13.03									0.896	-72.704
0.897	19.635									0.897	-72.63
0.898	16.029									0.898	-72.538
0.899	12.185									0.899	-72.431
0.9	8.1669									0.9	-72.313
0.901	3.9282									0.901	-72.186
0.902	-0.53244									0.902	-72.05
0.903	-5.2111									0.903	-71.906
0.904	-10.106									0.904	-71.757
0.905	-15.262									0.905	-71.603
0.906	-20.75									0.906	-71.444
0.907	-26.484									0.907	-71.282
0.908	-31.992									0.908	-71.117
0.909	-36.938									0.909	-70.949
0.91	-41.834									0.91	-70.78
0.911	-46.528									0.911	-70.609
0.912	-50.039									0.912	-70.437
0.913	-52.888									0.913	-70.264
0.914	-55.725									0.914	-70.091
0.915	-58.747									0.915	-69.918
0.916	-61.693									0.916	-69.746
0.917	-64.233									0.917	-69.573
0.918	-66.249									0.918	-69.401
0.919	-67.789									0.919	-69.23
0.92	-68.952									0.92	-69.059
0.921	-69.836									0.921	-68.889
0.922	-70.516									0.922	-68.72
0.923	-71.049									0.923	-68.551
0.924	-71.472									0.924	-68.383
0.925	-71.814									0.925	-68.215
0.926	-72.093									0.926	-68.047
0.927	-72.322									0.927	-67.879
0.928	-72.512									0.928	-67.711
0.929	-72.668									0.929	-67.542
0.93	-72.796									0.93	-67.372
0.931	-72.901									0.931	-67.201
0.932	-72.986									0.932	-67.027
0.933	-73.052									0.933	-66.851
0.934	-73.103									0.934	-66.672
0.935	-73.141									0.935	-66.488
0.936	-73.166									0.936	-66.299
0.937	-73.18									0.937	-66.103
0.938	-73.184									0.938	-65.898
0.939	-73.18									0.939	-65.683
0.94	-73.168									0.94	-65.455
0.941	-73.149									0.941	-65.211
0.942	-73.124									0.942	-64.946
0.943	-73.094									0.943	-64.653
0.944	-73.058									0.944	-64.324
0.945	-73.018									0.945	-63.945
0.946	-72.974									0.946	-63.497
0.947	-72.926									0.947	-62.945
0.948	-72.876									0.948	-62.227
0.949	-72.822									0.949	-61.214
0.95	-72.766									0.95	-59.575
0.951	-72.708									0.951	-56.025
0.952	-72.648									0.952	-34.782
0.953	-72.586									0.953	41.615
0.954	-72.523									0.954	37.314
0.955	-72.459									0.955	32.915
0.956	-72.393									0.956	28.381
0.957	-72.326									0.957	23.587
0.958	-72.259									0.958	18.406
0.959	-72.191									0.959	12.738
0.96	-72.122									0.96	6.5884
0.961	-72.052									0.961	0.14516
0.962	-71.983									0.962	-6.4072
0.963	-71.912									0.963	-13.105
0.964	-71.842									0.964	-20.293
0.965	-71.771									0.965	-28.18
0.966	-71.7									0.966	-35.586
0.967	-71.629									0.967	-42.55
0.968	-71.558									0.968	-49.968
0.969	-71.486									0.969	-56.65
0.97	-71.415									0.97	-62.699
0.971	-71.343									0.971	-66.878
0.972	-71.271									0.972	-69.408
0.973	-71.2									0.973	-70.894
0.974	-71.128									0.974	-71.761
0.975	-71.056									0.975	-72.264
0.976	-70.985									0.976	-72.548
0.977	-70.913									0.977	-72.699
0.978	-70.841									0.978	-72.764
0.979	-70.77									0.979	-72.772
0.98	-70.698									0.98	-72.742
0.981	-70.626									0.981	-72.683
0.982	-70.555									0.982	-72.603
0.983	-70.483									0.983	-72.507
0.984	-70.411									0.984	-72.397
0.985	-70.339									0.985	-72.276
0.986	-70.268									0.986	-72.145
0.987	-70.196									0.987	-72.007
0.988	-70.124									0.988	-71.862
0.989	-70.052									0.989	-71.711
0.99	-69.981									0.99	-71.555
0.991	-69.909									0.991	-71.395
0.992	-69.837									0.992	-71.232
0.993	-69.764									0.993	-71.066
0.994	-69.692									0.994	-70.898
0.995	-69.62									0.995	-70.728
0.996	-69.547									0.996	-70.556
0.997	-69.475									0.997	-70.384
0.998	-69.402									0.998	-70.212
0.999	-69.329									0.999	-70.039
1	-69.256									1	-69.866

## Sheet: Figure 13C
Figure 13 C1										Figure 13 C2
Time	Voltage									Time	Voltage
0	-50.497									0	-63.578
0.001	-51.036									0.001	-63.062
0.002	-51.059									0.002	-62.425
0.003	-50.23									0.003	-61.585
0.004	-46.69									0.004	-60.361
0.005	19.067									0.005	-58.226
0.006	25.819									0.006	-52.547
0.007	21.971									0.007	34.44
0.008	18.13									0.008	37.96
0.009	14.235									0.009	33.551
0.01	10.222									0.01	29.069
0.011	6.0265									0.011	24.446
0.012	1.6									0.012	19.542
0.013	-3.0802									0.013	14.216
0.014	-8.0525									0.014	8.4061
0.015	-13.406									0.015	2.2007
0.016	-19.346									0.016	-4.2567
0.017	-26.04									0.017	-10.938
0.018	-32.96									0.018	-18.159
0.019	-39.406									0.019	-26.457
0.02	-45.836									0.02	-35.012
0.021	-50.87									0.021	-43.288
0.022	-54.71									0.022	-51.797
0.023	-58.015									0.023	-59.144
0.024	-60.842									0.024	-64.707
0.025	-63.123									0.025	-68.051
0.026	-64.892									0.026	-69.93
0.027	-66.25									0.027	-70.969
0.028	-67.3									0.028	-71.534
0.029	-68.125									0.029	-71.83
0.03	-68.786									0.03	-71.967
0.031	-69.326									0.031	-72.008
0.032	-69.772									0.032	-71.989
0.033	-70.146									0.033	-71.929
0.034	-70.462									0.034	-71.84
0.035	-70.73									0.035	-71.729
0.036	-70.957									0.036	-71.603
0.037	-71.151									0.037	-71.463
0.038	-71.315									0.038	-71.312
0.039	-71.453									0.039	-71.152
0.04	-71.57									0.04	-70.985
0.041	-71.666									0.041	-70.811
0.042	-71.745									0.042	-70.631
0.043	-71.809									0.043	-70.446
0.044	-71.859									0.044	-70.256
0.045	-71.897									0.045	-70.064
0.046	-71.924									0.046	-69.868
0.047	-71.941									0.047	-69.67
0.048	-71.949									0.048	-69.469
0.049	-71.95									0.049	-69.267
0.05	-71.943									0.05	-69.063
0.051	-71.93									0.051	-68.858
0.052	-71.912									0.052	-68.651
0.053	-71.888									0.053	-68.444
0.054	-71.86									0.054	-68.235
0.055	-71.827									0.055	-68.025
0.056	-71.791									0.056	-67.814
0.057	-71.752									0.057	-67.601
0.058	-71.71									0.058	-67.386
0.059	-71.666									0.059	-67.169
0.06	-71.619									0.06	-66.948
0.061	-71.57									0.061	-66.724
0.062	-71.519									0.062	-66.495
0.063	-71.467									0.063	-66.261
0.064	-71.413									0.064	-66.019
0.065	-71.358									0.065	-65.767
0.066	-71.302									0.066	-65.504
0.067	-71.244									0.067	-65.226
0.068	-71.186									0.068	-64.929
0.069	-71.127									0.069	-64.607
0.07	-71.067									0.07	-64.252
0.071	-71.007									0.071	-63.853
0.072	-70.946									0.072	-63.39
0.073	-70.885									0.073	-62.834
0.074	-70.823									0.074	-62.131
0.075	-70.76									0.075	-61.174
0.076	-70.697									0.076	-59.699
0.077	-70.634									0.077	-56.809
0.078	-70.571									0.078	-45.987
0.079	-70.507									0.079	40.353
0.08	-70.443									0.08	36.254
0.081	-70.379									0.081	31.833
0.082	-70.314									0.082	27.318
0.083	-70.249									0.083	22.601
0.084	-70.184									0.084	17.544
0.085	-70.119									0.085	12.027
0.086	-70.054									0.086	6.0529
0.087	-69.988									0.087	-0.26902
0.088	-69.922									0.088	-6.8009
0.089	-69.856									0.089	-13.631
0.09	-69.789									0.09	-21.221
0.091	-69.723									0.091	-29.851
0.092	-69.656									0.092	-38.093
0.093	-69.589									0.093	-46.736
0.094	-69.522									0.094	-54.739
0.095	-69.454									0.095	-61.579
0.096	-69.386									0.096	-66.223
0.097	-69.318									0.097	-68.909
0.098	-69.25									0.098	-70.406
0.099	-69.181									0.099	-71.229
0.1	-69.112									0.1	-71.673
0.101	-69.043									0.101	-71.897
0.102	-68.973									0.102	-71.992
0.103	-68.903									0.103	-72.007
0.104	-68.833									0.104	-71.97
0.105	-68.762									0.105	-71.897
0.106	-68.691									0.106	-71.799
0.107	-68.62									0.107	-71.682
0.108	-68.548									0.108	-71.55
0.109	-68.475									0.109	-71.406
0.11	-68.402									0.11	-71.252
0.111	-68.329									0.111	-71.089
0.112	-68.255									0.112	-70.918
0.113	-68.18									0.113	-70.742
0.114	-68.105									0.114	-70.56
0.115	-68.03									0.115	-70.373
0.116	-67.953									0.116	-70.182
0.117	-67.876									0.117	-69.989
0.118	-67.798									0.118	-69.792
0.119	-67.719									0.119	-69.592
0.12	-67.64									0.12	-69.391
0.121	-67.559									0.121	-69.188
0.122	-67.478									0.122	-68.984
0.123	-67.395									0.123	-68.778
0.124	-67.312									0.124	-68.571
0.125	-67.227									0.125	-68.363
0.126	-67.141									0.126	-68.154
0.127	-67.053									0.127	-67.944
0.128	-66.964									0.128	-67.732
0.129	-66.874									0.129	-67.518
0.13	-66.781									0.13	-67.303
0.131	-66.687									0.131	-67.084
0.132	-66.591									0.132	-66.863
0.133	-66.492									0.133	-66.637
0.134	-66.391									0.134	-66.406
0.135	-66.287									0.135	-66.168
0.136	-66.181									0.136	-65.923
0.137	-66.07									0.137	-65.667
0.138	-65.957									0.138	-65.399
0.139	-65.839									0.139	-65.114
0.14	-65.716									0.14	-64.808
0.141	-65.588									0.141	-64.475
0.142	-65.454									0.142	-64.104
0.143	-65.313									0.143	-63.683
0.144	-65.164									0.144	-63.189
0.145	-65.006									0.145	-62.584
0.146	-64.836									0.146	-61.801
0.147	-64.653									0.147	-60.691
0.148	-64.454									0.148	-58.853
0.149	-64.234									0.149	-54.59
0.15	-63.99									0.15	-0.39282
0.151	-63.713									0.151	38.961
0.152	-63.392									0.152	34.541
0.153	-63.012									0.153	30.103
0.154	-62.545									0.154	25.531
0.155	-61.946									0.155	20.697
0.156	-61.121									0.156	15.47
0.157	-59.856									0.157	9.7766
0.158	-57.473									0.158	3.6445
0.159	-50.064									0.159	-2.765
0.16	39.128									0.16	-9.3825
0.161	36.45									0.161	-16.432
0.162	32.006									0.162	-24.466
0.163	27.553									0.163	-33.142
0.164	22.952									0.164	-41.284
0.165	18.094									0.165	-49.986
0.166	12.894									0.166	-57.562
0.167	7.3289									0.167	-63.651
0.168	1.5005									0.168	-67.445
0.169	-4.4444									0.169	-69.593
0.17	-10.443									0.17	-70.783
0.171	-16.606									0.171	-71.434
0.172	-23.107									0.172	-71.779
0.173	-29.579									0.173	-71.946
0.174	-34.985									0.174	-72.005
0.175	-39.322									0.175	-71.997
0.176	-43.174									0.176	-71.945
0.177	-45.718									0.177	-71.862
0.178	-45.874									0.178	-71.756
0.179	-40.814									0.179	-71.633
0.18	3.3918									0.18	-71.496
0.181	15.502									0.181	-71.348
0.182	11.695									0.182	-71.19
0.183	7.1552									0.183	-71.024
0.184	2.3836									0.184	-70.851
0.185	-2.5349									0.185	-70.672
0.186	-7.5322									0.186	-70.488
0.187	-12.581									0.187	-70.3
0.188	-17.695									0.188	-70.108
0.189	-22.823									0.189	-69.913
0.19	-27.659									0.19	-69.715
0.191	-31.767									0.191	-69.515
0.192	-35.06									0.192	-69.313
0.193	-37.837									0.193	-69.11
0.194	-40.382									0.194	-68.905
0.195	-42.525									0.195	-68.699
0.196	-43.449									0.196	-68.491
0.197	-41.817									0.197	-68.283
0.198	-33.445									0.198	-68.073
0.199	-6.9094									0.199	-67.862
0.2	2.7379									0.2	-67.65
0.201	0.26885									0.201	-67.435
0.202	-4.0887									0.202	-67.219
0.203	-8.8412									0.203	-66.999
0.204	-13.756									0.204	-66.776
0.205	-18.794									0.205	-66.548
0.206	-23.862									0.206	-66.315
0.207	-28.637									0.207	-66.075
0.208	-32.755									0.208	-65.826
0.209	-36.237									0.209	-65.565
0.21	-39.463									0.21	-65.291
0.211	-42.623									0.211	-64.999
0.212	-45.004									0.212	-64.683
0.213	-45.697									0.213	-64.337
0.214	-43.274									0.214	-63.949
0.215	-21.679									0.215	-63.503
0.216	14.374									0.216	-62.971
0.217	12.063									0.217	-62.309
0.218	8.0789									0.218	-61.425
0.219	3.8495									0.219	-60.109
0.22	-0.58054									0.22	-57.711
0.221	-5.202									0.221	-50.539
0.222	-10.007									0.222	39.534
0.223	-15.026									0.223	37.266
0.224	-20.306									0.224	32.836
0.225	-25.751									0.225	28.363
0.226	-30.933									0.226	23.704
0.227	-35.478									0.227	18.733
0.228	-39.69									0.228	13.327
0.229	-43.92									0.229	7.4532
0.23	-47.216									0.23	1.1951
0.231	-49.227									0.231	-5.2925
0.232	-50.388									0.232	-12.029
0.233	-50.986									0.233	-19.387
0.234	-51.073									0.234	-27.847
0.235	-50.371									0.235	-36.277
0.236	-47.341									0.236	-44.706
0.237	9.2679									0.237	-53.019
0.238	26.181									0.238	-60.187
0.239	22.348									0.239	-65.37
0.24	18.505									0.24	-68.428
0.241	14.62									0.241	-70.14
0.242	10.623									0.242	-71.084
0.243	6.4462									0.243	-71.596
0.244	2.0445									0.244	-71.86
0.245	-2.6085									0.245	-71.979
0.246	-7.5486									0.246	-72.009
0.247	-12.856									0.247	-71.982
0.248	-18.725									0.248	-71.916
0.249	-25.348									0.249	-71.823
0.25	-32.29									0.25	-71.71
0.251	-38.76									0.251	-71.581
0.252	-45.224									0.252	-71.44
0.253	-50.427									0.253	-71.288
0.254	-54.344									0.254	-71.126
0.255	-57.692									0.255	-70.958
0.256	-60.572									0.256	-70.782
0.257	-62.91									0.257	-70.602
0.258	-64.728									0.258	-70.416
0.259	-66.124									0.259	-70.226
0.26	-67.202									0.26	-70.033
0.261	-68.048									0.261	-69.837
0.262	-68.724									0.262	-69.638
0.263	-69.275									0.263	-69.437
0.264	-69.73									0.264	-69.235
0.265	-70.111									0.265	-69.031
0.266	-70.432									0.266	-68.825
0.267	-70.704									0.267	-68.619
0.268	-70.936									0.268	-68.411
0.269	-71.132									0.269	-68.202
0.27	-71.299									0.27	-67.992
0.271	-71.44									0.271	-67.78
0.272	-71.559									0.272	-67.567
0.273	-71.657									0.273	-67.352
0.274	-71.738									0.274	-67.134
0.275	-71.803									0.275	-66.913
0.276	-71.855									0.276	-66.689
0.277	-71.894									0.277	-66.459
0.278	-71.922									0.278	-66.223
0.279	-71.94									0.279	-65.98
0.28	-71.949									0.28	-65.726
0.281	-71.95									0.281	-65.461
0.282	-71.944									0.282	-65.181
0.283	-71.932									0.283	-64.88
0.284	-71.914									0.284	-64.554
0.285	-71.89									0.285	-64.193
0.286	-71.863									0.286	-63.784
0.287	-71.831									0.287	-63.309
0.288	-71.795									0.288	-62.735
0.289	-71.756									0.289	-62.001
0.29	-71.715									0.29	-60.987
0.291	-71.67									0.291	-59.38
0.292	-71.624									0.292	-56.018
0.293	-71.575									0.293	-39.768
0.294	-71.524									0.294	39.893
0.295	-71.472									0.295	35.57
0.296	-71.418									0.296	31.117
0.297	-71.363									0.297	26.58
0.298	-71.307									0.298	21.821
0.299	-71.25									0.299	16.703
0.3	-71.192									0.3	11.115
0.301	-71.133									0.301	5.0716
0.302	-71.073									0.302	-1.2885
0.303	-71.013									0.303	-7.8527
0.304	-70.952									0.304	-14.763
0.305	-70.891									0.305	-22.529
0.306	-70.829									0.306	-31.218
0.307	-70.766									0.307	-39.376
0.308	-70.704									0.308	-48.101
0.309	-70.641									0.309	-55.914
0.31	-70.577									0.31	-62.473
0.311	-70.513									0.311	-66.756
0.312	-70.449									0.312	-69.208
0.313	-70.385									0.313	-70.571
0.314	-70.321									0.314	-71.319
0.315	-70.256									0.315	-71.72
0.316	-70.191									0.316	-71.919
0.317	-70.126									0.317	-71.999
0.318	-70.06									0.318	-72.004
0.319	-69.994									0.319	-71.96
0.32	-69.929									0.32	-71.883
0.321	-69.862									0.321	-71.782
0.322	-69.796									0.322	-71.662
0.323	-69.729									0.323	-71.528
0.324	-69.663									0.324	-71.382
0.325	-69.596									0.325	-71.226
0.326	-69.528									0.326	-71.062
0.327	-69.461									0.327	-70.891
0.328	-69.393									0.328	-70.713
0.329	-69.325									0.329	-70.531
0.33	-69.257									0.33	-70.343
0.331	-69.188									0.331	-70.152
0.332	-69.119									0.332	-69.958
0.333	-69.05									0.333	-69.76
0.334	-68.98									0.334	-69.561
0.335	-68.91									0.335	-69.359
0.336	-68.84									0.336	-69.156
0.337	-68.769									0.337	-68.952
0.338	-68.698									0.338	-68.746
0.339	-68.627									0.339	-68.539
0.34	-68.555									0.34	-68.33
0.341	-68.482									0.341	-68.121
0.342	-68.41									0.342	-67.911
0.343	-68.336									0.343	-67.698
0.344	-68.262									0.344	-67.485
0.345	-68.188									0.345	-67.268
0.346	-68.113									0.346	-67.05
0.347	-68.037									0.347	-66.827
0.348	-67.961									0.348	-66.601
0.349	-67.884									0.349	-66.369
0.35	-67.806									0.35	-66.13
0.351	-67.727									0.351	-65.883
0.352	-67.648									0.352	-65.626
0.353	-67.567									0.353	-65.355
0.354	-67.486									0.354	-65.067
0.355	-67.404									0.355	-64.758
0.356	-67.32									0.356	-64.419
0.357	-67.235									0.357	-64.042
0.358	-67.149									0.358	-63.611
0.359	-67.062									0.359	-63.102
0.36	-66.973									0.36	-62.475
0.361	-66.883									0.361	-61.654
0.362	-66.791									0.362	-60.467
0.363	-66.697									0.363	-58.43
0.364	-66.6									0.364	-53.26
0.365	-66.502									0.365	28.58
0.366	-66.401									0.366	38.273
0.367	-66.298									0.367	33.867
0.368	-66.191									0.368	29.393
0.369	-66.082									0.369	24.784
0.37	-65.968									0.37	19.905
0.371	-65.851									0.371	14.612
0.372	-65.729									0.372	8.8357
0.373	-65.601									0.373	2.6543
0.374	-65.468									0.374	-3.7889
0.375	-65.328									0.375	-10.449
0.376	-65.179									0.376	-17.611
0.377	-65.022									0.377	-25.83
0.378	-64.853									0.378	-34.433
0.379	-64.672									0.379	-42.65
0.38	-64.475									0.38	-51.237
0.381	-64.257									0.381	-58.659
0.382	-64.016									0.382	-64.391
0.383	-63.742									0.383	-67.87
0.384	-63.427									0.384	-69.83
0.385	-63.053									0.385	-70.914
0.386	-62.597									0.386	-71.505
0.387	-62.014									0.387	-71.815
0.388	-61.218									0.388	-71.961
0.389	-60.014									0.389	-72.008
0.39	-57.809									0.39	-71.992
0.391	-51.47									0.391	-71.934
0.392	37.33									0.392	-71.847
0.393	36.893									0.393	-71.738
0.394	32.451									0.394	-71.612
0.395	28.001									0.395	-71.473
0.396	23.421									0.396	-71.323
0.397	18.594									0.397	-71.164
0.398	13.43									0.398	-70.997
0.399	7.8997									0.399	-70.823
0.4	2.0904									0.4	-70.644
0.401	-3.848									0.401	-70.459
0.402	-9.8389									0.402	-70.27
0.403	-15.977									0.403	-70.078
0.404	-22.444									0.404	-69.882
0.405	-28.965									0.405	-69.684
0.406	-34.505									0.406	-69.484
0.407	-38.913									0.407	-69.281
0.408	-42.823									0.408	-69.078
0.409	-45.559									0.409	-68.873
0.41	-46.003									0.41	-68.666
0.411	-41.892									0.411	-68.459
0.412	-2.2294									0.412	-68.25
0.413	15.701									0.413	-68.04
0.414	12.129									0.414	-67.829
0.415	7.6204									0.415	-67.617
0.416	2.8684									0.416	-67.402
0.417	-2.0406									0.417	-67.185
0.418	-7.0314									0.418	-66.965
0.419	-12.075									0.419	-66.741
0.42	-17.183									0.42	-66.512
0.421	-22.318									0.421	-66.278
0.422	-27.205									0.422	-66.036
0.423	-31.397									0.423	-65.786
0.424	-34.762									0.424	-65.524
0.425	-37.574									0.425	-65.247
0.426	-40.14									0.426	-64.951
0.427	-42.349									0.427	-64.632
0.428	-43.442									0.428	-64.28
0.429	-42.165									0.429	-63.884
0.43	-34.895									0.43	-63.426
0.431	-9.6063									0.431	-62.879
0.432	2.6421									0.432	-62.189
0.433	0.63552									0.433	-61.257
0.434	-3.6438									0.434	-59.836
0.435	-8.3735									0.435	-57.121
0.436	-13.275									0.436	-47.757
0.437	-18.304									0.437	40.401
0.438	-23.379									0.438	36.577
0.439	-28.201									0.439	32.156
0.44	-32.389									0.44	27.647
0.441	-35.919									0.441	22.951
0.442	-39.153									0.442	17.924
0.443	-42.333									0.443	12.443
0.444	-44.836									0.444	6.4987
0.445	-45.725									0.445	0.19563
0.446	-43.771									0.446	-6.3213
0.447	-27.195									0.447	-13.12
0.448	14.042									0.448	-20.633
0.449	12.425									0.449	-29.217
0.45	8.4763									0.45	-37.519
0.451	4.2669									0.451	-46.103
0.452	-0.14392									0.452	-54.203
0.453	-4.7478									0.453	-61.157
0.454	-9.5347									0.454	-65.968
0.455	-14.531									0.455	-68.766
0.456	-19.785									0.456	-70.327
0.457	-25.228									0.457	-71.186
0.458	-30.458									0.458	-71.65
0.459	-35.063									0.459	-71.887
0.46	-39.279									0.46	-71.989
0.461	-43.529									0.461	-72.008
0.462	-46.959									0.462	-71.974
0.463	-49.075									0.463	-71.903
0.464	-50.302									0.464	-71.807
0.465	-50.946									0.465	-71.691
0.466	-51.083									0.466	-71.56
0.467	-50.477									0.467	-71.417
0.468	-47.819									0.468	-71.263
0.469	-3.9975									0.469	-71.101
0.47	26.483									0.47	-70.931
0.471	22.669									0.471	-70.755
0.472	18.827									0.472	-70.573
0.473	14.949									0.473	-70.387
0.474	10.964									0.474	-70.196
0.475	6.8049									0.475	-70.002
0.476	2.4233									0.476	-69.806
0.477	-2.2068									0.477	-69.607
0.478	-7.1205									0.478	-69.406
0.479	-12.391									0.479	-69.203
0.48	-18.201									0.48	-68.998
0.481	-24.761									0.481	-68.793
0.482	-31.715									0.482	-68.586
0.483	-38.215									0.483	-68.378
0.484	-44.688									0.484	-68.169
0.485	-50.036									0.485	-67.959
0.486	-54.023									0.486	-67.747
0.487	-57.409									0.487	-67.534
0.488	-60.335									0.488	-67.318
0.489	-62.722									0.489	-67.1
0.49	-64.584									0.49	-66.878
0.491	-66.014									0.491	-66.653
0.492	-67.117									0.492	-66.422
0.493	-67.981									0.493	-66.185
0.494	-68.67									0.494	-65.94
0.495	-69.231									0.495	-65.685
0.496	-69.693									0.496	-65.418
0.497	-70.08									0.497	-65.134
0.498	-70.406									0.498	-64.83
0.499	-70.682									0.499	-64.499
0.5	-70.917									0.5	-64.131
0.501	-71.116									0.501	-63.714
0.502	-71.286									0.502	-63.226
0.503	-71.429									0.503	-62.631
0.504	-71.549									0.504	-61.863
0.505	-71.649									0.505	-60.784
0.506	-71.732									0.506	-59.022
0.507	-71.798									0.507	-55.064
0.508	-71.851									0.508	-19.696
0.509	-71.891									0.509	39.252
0.51	-71.92									0.51	34.847
0.511	-71.939									0.511	30.413
0.512	-71.948									0.512	25.849
0.513	-71.95									0.513	21.038
0.514	-71.945									0.514	15.841
0.515	-71.933									0.515	10.176
0.516	-71.915									0.516	4.0712
0.517	-71.893									0.517	-2.3243
0.518	-71.865									0.518	-8.9257
0.519	-71.834									0.519	-15.929
0.52	-71.798									0.52	-23.885
0.521	-71.76									0.521	-32.575
0.522	-71.718									0.522	-40.705
0.523	-71.674									0.523	-49.441
0.524	-71.628									0.524	-57.084
0.525	-71.579									0.525	-63.32
0.526	-71.529									0.526	-67.252
0.527	-71.477									0.527	-69.486
0.528	-71.423									0.528	-70.725
0.529	-71.368									0.529	-71.403
0.53	-71.312									0.53	-71.763
0.531	-71.255									0.531	-71.939
0.532	-71.197									0.532	-72.004
0.533	-71.138									0.533	-72
0.534	-71.078									0.534	-71.95
0.535	-71.018									0.535	-71.868
0.536	-70.957									0.536	-71.764
0.537	-70.896									0.537	-71.642
0.538	-70.834									0.538	-71.506
0.539	-70.772									0.539	-71.358
0.54	-70.709									0.54	-71.201
0.541	-70.646									0.541	-71.035
0.542	-70.583									0.542	-70.863
0.543	-70.519									0.543	-70.684
0.544	-70.455									0.544	-70.501
0.545	-70.391									0.545	-70.313
0.546	-70.326									0.546	-70.121
0.547	-70.261									0.547	-69.926
0.548	-70.196									0.548	-69.728
0.549	-70.131									0.549	-69.528
0.55	-70.066									0.55	-69.327
0.551	-70									0.551	-69.123
0.552	-69.934									0.552	-68.918
0.553	-69.868									0.553	-68.712
0.554	-69.802									0.554	-68.505
0.555	-69.735									0.555	-68.297
0.556	-69.668									0.556	-68.087
0.557	-69.601									0.557	-67.876
0.558	-69.534									0.558	-67.664
0.559	-69.467									0.559	-67.45
0.56	-69.399									0.56	-67.233
0.561	-69.331									0.561	-67.014
0.562	-69.262									0.562	-66.791
0.563	-69.194									0.563	-66.563
0.564	-69.125									0.564	-66.33
0.565	-69.056									0.565	-66.091
0.566	-68.986									0.566	-65.842
0.567	-68.916									0.567	-65.583
0.568	-68.846									0.568	-65.309
0.569	-68.775									0.569	-65.018
0.57	-68.704									0.57	-64.704
0.571	-68.633									0.571	-64.36
0.572	-68.561									0.572	-63.975
0.573	-68.489									0.573	-63.533
0.574	-68.416									0.574	-63.009
0.575	-68.342									0.575	-62.357
0.576	-68.269									0.576	-61.491
0.577	-68.194									0.577	-60.214
0.578	-68.119									0.578	-57.929
0.579	-68.044									0.579	-51.422
0.58	-67.967									0.58	38.318
0.581	-67.89									0.581	37.552
0.582	-67.812									0.582	33.131
0.583	-67.734									0.583	28.642
0.584	-67.654									0.584	24.001
0.585	-67.574									0.585	19.062
0.586	-67.493									0.586	13.695
0.587	-67.411									0.587	7.8418
0.588	-67.327									0.588	1.6071
0.589	-67.243									0.589	-4.8685
0.59	-67.157									0.59	-11.58
0.591	-67.069									0.591	-18.882
0.592	-66.981									0.592	-27.276
0.593	-66.89									0.593	-35.76
0.594	-66.798									0.594	-44.124
0.595	-66.705									0.595	-52.517
0.596	-66.609									0.596	-59.762
0.597	-66.511									0.597	-65.102
0.598	-66.41									0.598	-68.276
0.599	-66.307									0.599	-70.055
0.6	-66.201									0.6	-71.037
0.601	-66.091									0.601	-71.571
0.602	-65.978									0.602	-71.848
0.603	-65.861									0.603	-71.974
0.604	-65.739									0.604	-72.009
0.605	-65.612									0.605	-71.985
0.606	-65.479									0.606	-71.921
0.607	-65.34									0.607	-71.83
0.608	-65.192									0.608	-71.718
0.609	-65.036									0.609	-71.59
0.61	-64.868									0.61	-71.449
0.611	-64.688									0.611	-71.298
0.612	-64.492									0.612	-71.137
0.613	-64.277									0.613	-70.969
0.614	-64.037									0.614	-70.794
0.615	-63.767									0.615	-70.614
0.616	-63.455									0.616	-70.428
0.617	-63.088									0.617	-70.239
0.618	-62.64									0.618	-70.046
0.619	-62.07									0.619	-69.85
0.62	-61.297									0.62	-69.651
0.621	-60.141									0.621	-69.45
0.622	-58.074									0.622	-69.248
0.623	-52.458									0.623	-69.044
0.624	33.643									0.624	-68.839
0.625	37.263									0.625	-68.632
0.626	32.828									0.626	-68.424
0.627	28.389									0.627	-68.216
0.628	23.82									0.628	-68.006
0.629	19.018									0.629	-67.794
0.63	13.878									0.63	-67.581
0.631	8.3786									0.631	-67.366
0.632	2.5852									0.632	-67.149
0.633	-3.3459									0.633	-66.928
0.634	-9.3316									0.634	-66.703
0.635	-15.449									0.635	-66.474
0.636	-21.888									0.636	-66.239
0.637	-28.44									0.637	-65.996
0.638	-34.092									0.638	-65.743
0.639	-38.565									0.639	-65.479
0.64	-42.524									0.64	-65.199
0.641	-45.406									0.641	-64.9
0.642	-46.077									0.642	-64.576
0.643	-42.631									0.643	-64.217
0.644	-7.9479									0.644	-63.813
0.645	15.792									0.645	-63.343
0.646	12.483									0.646	-62.776
0.647	8.0054									0.647	-62.056
0.648	3.2664									0.648	-61.065
0.649	-1.6309									0.649	-59.516
0.65	-6.6171									0.65	-56.372
0.651	-11.656									0.651	-42.929
0.652	-16.759									0.652	40.115
0.653	-21.897									0.653	35.855
0.654	-26.822									0.654	31.404
0.655	-31.084									0.655	26.881
0.656	-34.51									0.656	22.14
0.657	-37.354									0.657	17.047
0.658	-39.935									0.658	11.493
0.659	-42.195									0.659	5.4743
0.66	-43.419									0.66	-0.86876
0.661	-42.415									0.661	-7.4194
0.662	-35.915									0.662	-14.295
0.663	-12.056									0.663	-21.989
0.664	2.5151									0.664	-30.656
0.665	0.95383									0.665	-38.845
0.666	-3.2527									0.666	-47.551
0.667	-7.9626									0.667	-55.439
0.668	-12.852									0.668	-62.12
0.669	-17.871									0.669	-66.547
0.67	-22.95									0.67	-69.091
0.671	-27.811									0.671	-70.507
0.672	-32.061									0.672	-71.284
0.673	-35.636									0.673	-71.701
0.674	-38.878									0.674	-71.911
0.675	-42.074									0.675	-71.996
0.676	-44.676									0.676	-72.005
0.677	-45.73									0.677	-71.964
0.678	-44.141									0.678	-71.889
0.679	-30.755									0.679	-71.789
0.68	13.52									0.68	-71.67
0.681	12.734									0.681	-71.537
0.682	8.8223									0.682	-71.392
0.683	4.6309									0.683	-71.237
0.684	0.23702									0.684	-71.073
0.685	-4.3513									0.685	-70.902
0.686	-9.1221									0.686	-70.725
0.687	-14.098									0.687	-70.542
0.688	-19.33									0.688	-70.355
0.689	-24.767									0.689	-70.164
0.69	-30.037									0.69	-69.97
0.691	-34.696									0.691	-69.773
0.692	-38.921									0.692	-69.574
0.693	-43.181									0.693	-69.372
0.694	-46.724									0.694	-69.169
0.695	-48.937									0.695	-68.965
0.696	-50.224									0.696	-68.759
0.697	-50.912									0.697	-68.552
0.698	-51.097									0.698	-68.344
0.699	-50.581									0.699	-68.135
0.7	-48.243									0.7	-67.924
0.701	-20.176									0.701	-67.712
0.702	26.796									0.702	-67.498
0.703	23.02									0.703	-67.282
0.704	19.176									0.704	-67.064
0.705	15.304									0.705	-66.842
0.706	11.331									0.706	-66.615
0.707	7.1879									0.707	-66.384
0.708	2.828									0.708	-66.146
0.709	-1.7786									0.709	-65.899
0.71	-6.665									0.71	-65.643
0.711	-11.898									0.711	-65.373
0.712	-17.65									0.712	-65.086
0.713	-24.142									0.713	-64.778
0.714	-31.102									0.714	-64.442
0.715	-37.644									0.715	-64.067
0.716	-44.121									0.716	-63.64
0.717	-49.625									0.717	-63.138
0.718	-53.695									0.718	-62.521
0.719	-57.122									0.719	-61.715
0.72	-60.093									0.72	-60.561
0.721	-62.53									0.721	-58.612
0.722	-64.436									0.722	-53.86
0.723	-65.9									0.723	19.86
0.724	-67.028									0.724	38.556
0.725	-67.911									0.725	34.145
0.726	-68.614									0.726	29.686
0.727	-69.185									0.727	25.09
0.728	-69.655									0.728	20.229
0.729	-70.048									0.729	14.962
0.73	-70.379									0.73	9.2174
0.731	-70.659									0.731	3.0558
0.732	-70.897									0.732	-3.3738
0.733	-71.1									0.733	-10.016
0.734	-71.272									0.734	-17.131
0.735	-71.417									0.735	-25.276
0.736	-71.539									0.736	-33.913
0.737	-71.641									0.737	-42.093
0.738	-71.725									0.738	-50.735
0.739	-71.793									0.739	-58.22
0.74	-71.847									0.74	-64.099
0.741	-71.888									0.741	-67.703
0.742	-71.918									0.742	-69.737
0.743	-71.937									0.743	-70.863
0.744	-71.948									0.744	-71.477
0.745	-71.95									0.745	-71.801
0.746	-71.946									0.746	-71.955
0.747	-71.934									0.747	-72.007
0.748	-71.917									0.748	-71.994
0.749	-71.895									0.749	-71.939
0.75	-71.868									0.75	-71.853
0.751	-71.837									0.751	-71.745
0.752	-71.802									0.752	-71.621
0.753	-71.764									0.753	-71.483
0.754	-71.722									0.754	-71.333
0.755	-71.678									0.755	-71.175
0.756	-71.632									0.756	-71.008
0.757	-71.584									0.757	-70.834
0.758	-71.533									0.758	-70.655
0.759	-71.481									0.759	-70.471
0.76	-71.428									0.76	-70.282
0.761	-71.373									0.761	-70.09
0.762	-71.317									0.762	-69.895
0.763	-71.26									0.763	-69.697
0.764	-71.202									0.764	-69.496
0.765	-71.144									0.765	-69.294
0.766	-71.084									0.766	-69.091
0.767	-71.024									0.767	-68.886
0.768	-70.963									0.768	-68.679
0.769	-70.902									0.769	-68.472
0.77	-70.84									0.77	-68.263
0.771	-70.778									0.771	-68.054
0.772	-70.715									0.772	-67.843
0.773	-70.652									0.773	-67.63
0.774	-70.588									0.774	-67.415
0.775	-70.525									0.775	-67.198
0.776	-70.461									0.776	-66.979
0.777	-70.397									0.777	-66.755
0.778	-70.332									0.778	-66.527
0.779	-70.267									0.779	-66.293
0.78	-70.202									0.78	-66.052
0.781	-70.137									0.781	-65.802
0.782	-70.072									0.782	-65.54
0.783	-70.006									0.783	-65.265
0.784	-69.94									0.784	-64.971
0.785	-69.874									0.785	-64.652
0.786	-69.808									0.786	-64.303
0.787	-69.741									0.787	-63.91
0.788	-69.674									0.788	-63.457
0.789	-69.607									0.789	-62.916
0.79	-69.54									0.79	-62.238
0.791	-69.473									0.791	-61.326
0.792	-69.405									0.792	-59.949
0.793	-69.337									0.793	-57.372
0.794	-69.269									0.794	-49.01
0.795	-69.2									0.795	40.271
0.796	-69.131									0.796	36.851
0.797	-69.062									0.797	32.43
0.798	-68.992									0.798	27.94
0.799	-68.923									0.799	23.258
0.8	-68.852									0.8	18.252
0.801	-68.782									0.801	12.801
0.802	-68.711									0.802	6.8854
0.803	-68.639									0.803	0.60021
0.804	-68.568									0.804	-5.9052
0.805	-68.495									0.805	-12.677
0.806	-68.423									0.806	-20.126
0.807	-68.349									0.807	-28.665
0.808	-68.275									0.808	-37.014
0.809	-68.201									0.809	-45.538
0.81	-68.126									0.81	-53.721
0.811	-68.051									0.811	-60.766
0.812	-67.974									0.812	-65.728
0.813	-67.897									0.813	-68.631
0.814	-67.82									0.814	-70.252
0.815	-67.741									0.815	-71.145
0.816	-67.662									0.816	-71.628
0.817	-67.582									0.817	-71.876
0.818	-67.5									0.818	-71.985
0.819	-67.418									0.819	-72.008
0.82	-67.335									0.82	-71.977
0.821	-67.25									0.821	-71.909
0.822	-67.165									0.822	-71.814
0.823	-67.078									0.823	-71.699
0.824	-66.989									0.824	-71.569
0.825	-66.899									0.825	-71.426
0.826	-66.807									0.826	-71.273
0.827	-66.713									0.827	-71.111
0.828	-66.618									0.828	-70.942
0.829	-66.52									0.829	-70.766
0.83	-66.419									0.83	-70.585
0.831	-66.316									0.831	-70.399
0.832	-66.21									0.832	-70.208
0.833	-66.101									0.833	-70.015
0.834	-65.989									0.834	-69.818
0.835	-65.872									0.835	-69.619
0.836	-65.75									0.836	-69.418
0.837	-65.624									0.837	-69.216
0.838	-65.492									0.838	-69.012
0.839	-65.353									0.839	-68.806
0.84	-65.206									0.84	-68.599
0.841	-65.05									0.841	-68.392
0.842	-64.884									0.842	-68.183
0.843	-64.705									0.843	-67.972
0.844	-64.511									0.844	-67.761
0.845	-64.297									0.845	-67.547
0.846	-64.061									0.846	-67.332
0.847	-63.793									0.847	-67.114
0.848	-63.486									0.848	-66.893
0.849	-63.124									0.849	-66.667
0.85	-62.685									0.85	-66.437
0.851	-62.129									0.851	-66.201
0.852	-61.38									0.852	-65.956
0.853	-60.273									0.853	-65.702
0.854	-58.336									0.854	-65.436
0.855	-53.376									0.855	-65.153
0.856	25.242									0.856	-64.851
0.857	37.668									0.857	-64.522
0.858	33.253									0.858	-64.157
0.859	28.796									0.859	-63.743
0.86	24.242									0.86	-63.261
0.861	19.472									0.861	-62.674
0.862	14.375									0.862	-61.921
0.863	8.9002									0.863	-60.869
0.864	3.1324									0.864	-59.174
0.865	-2.7934									0.865	-55.489
0.866	-8.7734									0.866	-31.815
0.867	-14.87									0.867	39.527
0.868	-21.275									0.868	35.15
0.869	-27.852									0.869	30.696
0.87	-33.625									0.87	26.15
0.871	-38.179									0.871	21.36
0.872	-42.177									0.872	16.199
0.873	-45.22									0.873	10.568
0.874	-46.131									0.874	4.4871
0.875	-43.308									0.875	-1.8941
0.876	-15.075									0.876	-8.4792
0.877	15.797									0.877	-15.443
0.878	12.88									0.878	-23.318
0.879	8.434									0.879	-32.016
0.88	3.7187									0.88	-40.149
0.881	-1.1686									0.881	-48.887
0.882	-6.1491									0.882	-56.598
0.883	-11.184									0.883	-62.973
0.884	-16.279									0.884	-67.05
0.885	-21.42									0.885	-69.373
0.886	-26.383									0.886	-70.662
0.887	-30.722									0.887	-71.369
0.888	-34.22									0.888	-71.745
0.889	-37.103									0.889	-71.931
0.89	-39.702									0.89	-72.002
0.891	-42.013									0.891	-72.001
0.892	-43.376									0.892	-71.954
0.893	-42.656									0.893	-71.875
0.894	-36.943									0.894	-71.771
0.895	-15.123									0.895	-71.65
0.896	2.2157									0.896	-71.515
0.897	1.2688									0.897	-71.368
0.898	-2.8398									0.898	-71.211
0.899	-7.524									0.899	-71.046
0.9	-12.401									0.9	-70.874
0.901	-17.409									0.901	-70.696
0.902	-22.49									0.902	-70.513
0.903	-27.389									0.903	-70.325
0.904	-31.705									0.904	-70.134
0.905	-35.332									0.905	-69.939
0.906	-38.587									0.906	-69.742
0.907	-41.791									0.907	-69.542
0.908	-44.491									0.908	-69.34
0.909	-45.718									0.909	-69.137
0.91	-44.47									0.91	-68.932
0.911	-33.683									0.911	-68.726
0.912	12.61									0.912	-68.519
0.913	13.066									0.913	-68.311
0.914	9.2004									0.914	-68.101
0.915	5.033									0.915	-67.891
0.916	0.65502									0.916	-67.678
0.917	-3.9143									0.917	-67.464
0.918	-8.6675									0.918	-67.248
0.919	-13.623									0.919	-67.029
0.92	-18.83									0.92	-66.806
0.921	-24.257									0.921	-66.579
0.922	-29.566									0.922	-66.347
0.923	-34.287									0.923	-66.107
0.924	-38.527									0.924	-65.859
0.925	-42.791									0.925	-65.601
0.926	-46.449									0.926	-65.329
0.927	-48.774									0.927	-65.039
0.928	-50.131									0.928	-64.727
0.929	-50.868									0.929	-64.385
0.93	-51.103									0.93	-64.004
0.931	-50.676									0.931	-63.566
0.932	-48.645									0.932	-63.049
0.933	-31.625									0.933	-62.408
0.934	27.089									0.934	-61.561
0.935	23.378									0.935	-60.324
0.936	19.54									0.936	-58.15
0.937	15.673									0.937	-52.274
0.938	11.708									0.938	35.744
0.939	7.5875									0.939	37.854
0.94	3.2515									0.94	33.446
0.941	-1.3321									0.941	28.966
0.942	-6.1892									0.942	24.337
0.943	-11.385									0.943	19.423
0.944	-17.077									0.944	14.083
0.945	-23.496									0.945	8.2643
0.946	-30.452									0.946	2.0497
0.947	-37.045									0.947	-4.4117
0.948	-43.51									0.948	-11.101
0.949	-49.189									0.949	-18.342
0.95	-53.356									0.95	-26.664
0.951	-56.826									0.951	-35.203
0.952	-59.842									0.952	-43.501
0.953	-62.329									0.953	-51.98
0.954	-64.281									0.954	-59.303
0.955	-65.78									0.955	-64.809
0.956	-66.935									0.956	-68.109
0.957	-67.837									0.957	-69.963
0.958	-68.555									0.958	-70.987
0.959	-69.136									0.959	-71.544
0.96	-69.615									0.96	-71.834
0.961	-70.014									0.961	-71.969
0.962	-70.35									0.962	-72.009
0.963	-70.635									0.963	-71.988
0.964	-70.876									0.964	-71.927
0.965	-71.082									0.965	-71.837
0.966	-71.257									0.966	-71.727
0.967	-71.404									0.967	-71.6
0.968	-71.529									0.968	-71.46
0.969	-71.632									0.969	-71.309
0.97	-71.718									0.97	-71.149
0.971	-71.787									0.971	-70.981
0.972	-71.842									0.972	-70.806
0.973	-71.884									0.973	-70.626
0.974	-71.915									0.974	-70.441
0.975	-71.936									0.975	-70.252
0.976	-71.947									0.976	-70.059
0.977	-71.95									0.977	-69.863
0.978	-71.946									0.978	-69.665
0.979	-71.936									0.979	-69.464
0.98	-71.919									0.98	-69.262
0.981	-71.897									0.981	-69.058
0.982	-71.871									0.982	-68.853
0.983	-71.84									0.983	-68.646
0.984	-71.805									0.984	-68.439
0.985	-71.767									0.985	-68.23
0.986	-71.726									0.986	-68.02
0.987	-71.683									0.987	-67.809
0.988	-71.636									0.988	-67.596
0.989	-71.588									0.989	-67.381
0.99	-71.538									0.99	-67.164
0.991	-71.486									0.991	-66.943
0.992	-71.433									0.992	-66.719
0.993	-71.378									0.993	-66.49
0.994	-71.322									0.994	-66.255
0.995	-71.266									0.995	-66.013
0.996	-71.208									0.996	-65.761
0.997	-71.149									0.997	-65.498
0.998	-71.089									0.998	-65.219
0.999	-71.029									0.999	-64.922
1	-70.969									1	-64.599
